# Supplementary material for: Spectroelectrochemical study of carbon structural and functionality characteristics on vanadium redox reactions for flow batteries
Source: Royal Society of Chemistry journal article supplement (doi:10.1039/d4ma00675e), 2024-01-01
Supplement: d4ma00675e1.pdf [file d4ma00675e1.pdf]

**Spectroelectrochemical Study of Carbon Structural and Functionality Characteristics on  
Vanadium Redox Reactions for Flow Batteries**

Ha H. Phan,<sup>1</sup> Jon G. Bell,<sup>1</sup> Greg A. Mutch,<sup>2</sup> Alan J McCue<sup>3</sup>, Anh N. Phan,<sup>1\*</sup> and K. Mark  
Thomas<sup>1\*</sup>

<sup>1</sup> Wolfson Northern Carbon Reduction Laboratories, School of Engineering, Newcastle  
University, Newcastle upon Tyne NE1 7RU, United Kingdom

<sup>2</sup> School of Engineering, Newcastle University, Newcastle upon Tyne NE1 7RU, United  
Kingdom

School of Chemistry, University of Aberdeen, Aberdeen AB24 3UE, United Kingdom

\*Corresponding authors

## Contents

|                                                                                                                                                                              | Page      |
|------------------------------------------------------------------------------------------------------------------------------------------------------------------------------|-----------|
| <b>1. Gas Adsorption Characteristics</b>                                                                                                                                     | <b>5</b>  |
| <b>1.1 Carbonization in a Nitrogen Atmosphere (Series 1)</b>                                                                                                                 | <b>5</b>  |
| 1.1.1 Carbon Dioxide Adsorption and Desorption Isotherms at 0°C for the Series of Carbons prepared under a Nitrogen Atmosphere                                               | 5         |
| 1.1.2 Dubinin-Radushkevich Graphs for Carbon Dioxide Adsorption at 0°C for the Series of Carbons prepared under a Nitrogen Atmosphere                                        | 5         |
| 1.1.3 Carbon Dioxide Adsorption Kinetic Profiles for the Series of Carbons Prepared under a Nitrogen Atmosphere.                                                             | 7         |
| <b>1.2 Carbonization in a Carbon Dioxide Atmosphere (Series 2)</b>                                                                                                           | <b>9</b>  |
| 1.2.1 Nitrogen Adsorption and Desorption Isotherms at -196°C for the Series of Carbons prepared under Carbon Dioxide Atmosphere                                              | 9         |
| 1.2.2 BET graphs and Mesopore Pore Size Distributions for Nitrogen Adsorption and Desorption at -196°C for the series of Carbons prepared under a Carbon Dioxide Atmosphere. | 11        |
| 1.2.3 Dubinin-Radushkevich graphs for Nitrogen Adsorption at -196°C for the series of Carbons prepared in a Carbon Dioxide Atmosphere.                                       | 17        |
| 1.2.4 CO <sub>2</sub> Adsorption and Desorption Isotherms at 0°C for the Series of Carbons prepared in a Carbon Dioxide Atmosphere.                                          | 19        |
| 1.2.5 Dubinin-Radushkevich graphs for Carbon Dioxide adsorption at 0°C for the Series Carbons prepared in a Carbon Dioxide Atmosphere.                                       | 20        |
| <b>1.3 Chemical Treatment of Carbon for Functional Group Modification</b>                                                                                                    | <b>23</b> |
| 1.3.1 Nitrogen Adsorption at -196°C for Functionalized Carbons.                                                                                                              | 23        |
| 1.3.2 BET Graphs and Mesopore Pore Size Distributions for Nitrogen Adsorption at -196°C on Functionalized Carbons.                                                           | 25        |
| 1.3.3 Dubinin-Radushkevich graphs for Nitrogen Adsorption at -196°C on Functionalized Carbons.                                                                               | 31        |
| 1.3.4 Carbon Dioxide Adsorption Isotherms at 0°C on Functionalized Carbons.                                                                                                  | 33        |
| 1.3.5 Dubinin-Radushkevich Graphs for Carbon Dioxide Adsorption at 0°C for Functionalized Carbons.                                                                           | 35        |

|                                                                                                                                                                                                                |    |
|----------------------------------------------------------------------------------------------------------------------------------------------------------------------------------------------------------------|----|
| <b>1.4 Comparison of Gas Adsorption Parameters</b>                                                                                                                                                             | 38 |
| <b>2. Electrochemistry</b>                                                                                                                                                                                     | 40 |
| <b>2.1 Cyclic Voltammetry</b>                                                                                                                                                                                  | 40 |
| 2.1.1 Comparison of Cyclic Voltammograms with a Sweep Rate of 20mV s <sup>-1</sup> for Carbon/PVDF Electrodes made from Carbons prepared in Nitrogen and Carbon Dioxide Atmospheres.                           | 40 |
| 2.1.2 Comparison of Cyclic Voltammograms for Carbon Electrodes as a function of Sweep Rates for Carbons with a range of Heat Treatment Temperatures.                                                           | 42 |
| 2.1.3 Cyclic Voltammograms as a Function of Sweep Rate.                                                                                                                                                        | 44 |
| 2.1.4 Comparison of Cyclic Voltammograms (Sweep Rate 20 mV s <sup>-1</sup> ) for Electrodes made from Carbons prepared under Nitrogen and Carbon Dioxide Atmospheres with corresponding functionalized Carbons | 47 |
| <b>2.2 Modeling of Electrical Impedance Spectra</b>                                                                                                                                                            | 48 |
| <b>2.3 Cell Performance Repeatability Measurements</b>                                                                                                                                                         | 54 |
| <b>3. X-ray Photoelectron Spectroscopy</b>                                                                                                                                                                     | 58 |
| <b>3.1 Repeatability Studies</b>                                                                                                                                                                               | 58 |
| <b>3.2 Comparison of X-ray Photoelectron O 1s Spectra for various Hold Times</b>                                                                                                                               | 61 |
| <b>3.3 Comparison of X-ray Photoelectron O 1s Spectra for Series 1 (N<sub>2</sub> Atmosphere) and Series 2 (CO<sub>2</sub> Atmosphere) as a Function of Heat Treatment Temperature</b>                         | 63 |
| <b>3.4 Comparison of X-ray Photoelectron Spectra for Various Treatments Methods with Original Materials</b>                                                                                                    | 65 |
| <b>3.5 XPS N 1s Spectra for chemically treated and original carbons.</b>                                                                                                                                       | 67 |
| <b>3.6 Curve Resolution Data for X-ray Photoelectron Spectra</b>                                                                                                                                               | 69 |

|                                                                                                       |            |
|-------------------------------------------------------------------------------------------------------|------------|
| <b>4. Temperature Programmed Desorption</b>                                                           | <b>80</b>  |
| <b>5. Thermogravimetric Analysis</b>                                                                  | <b>82</b>  |
| <b>6. Powder X-ray Diffraction</b>                                                                    | <b>83</b>  |
| <b>7. Raman Spectroscopy</b>                                                                          | <b>85</b>  |
| 7.1 Repeatability of Curve Fitting                                                                    | 85         |
| 7.2 Raman Spectra, Curve Fitting, and Residuals                                                       | 90         |
| 7.3 Comparisons of Raman, X-ray Diffraction, and Carbonization<br>Temperature Data                    | 103        |
| <b>8. Fourier Transform Infrared Spectroscopy</b>                                                     | <b>106</b> |
| <b>9. Electron Microscopy</b>                                                                         | <b>109</b> |
| <b>10. Comparison of Characterization Data for the HNO<sub>3</sub> Functionalized<br/>    Carbons</b> | <b>110</b> |

# 1. Gas Adsorption Characteristics

## 1.1 Carbonization in a Nitrogen Atmosphere (Series 1)

### 1.1.1 Carbon Dioxide Adsorption and Desorption Isotherms at 0°C for the Series of Carbons Prepared under Nitrogen Atmosphere

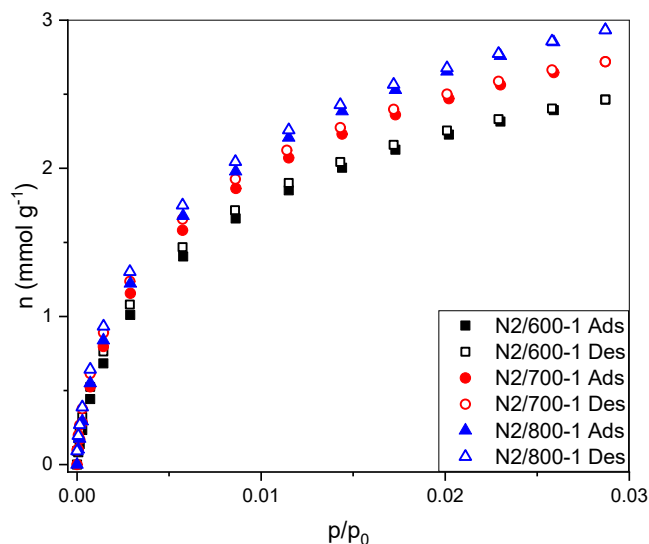

Figure S1 Carbon dioxide adsorption and desorption isotherms for carbons N<sub>2</sub>/600-1, N<sub>2</sub>/700-1 and N<sub>2</sub>/800-1 at 0°C

### 1.1.2 Dubinin-Radushkevich Graphs for Carbon Dioxide Adsorption at 0°C for the Series of Carbons Prepared under Nitrogen Atmosphere

a)

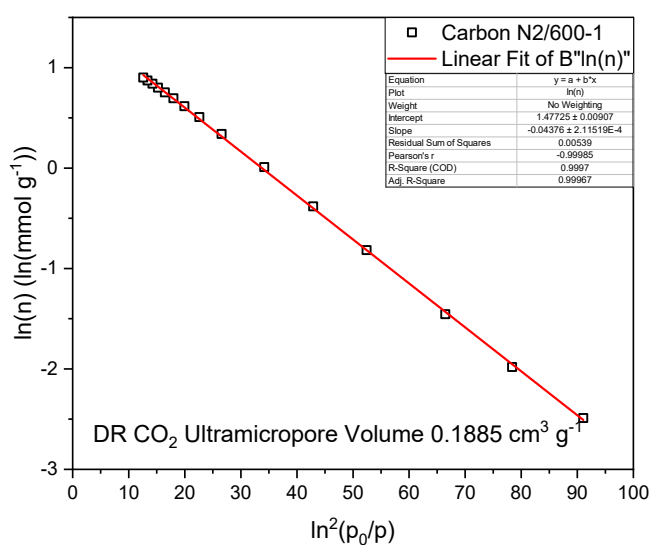

b)

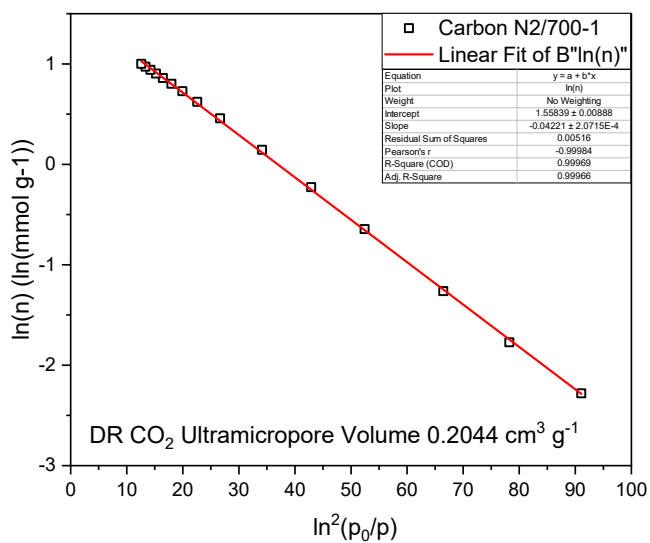

c)

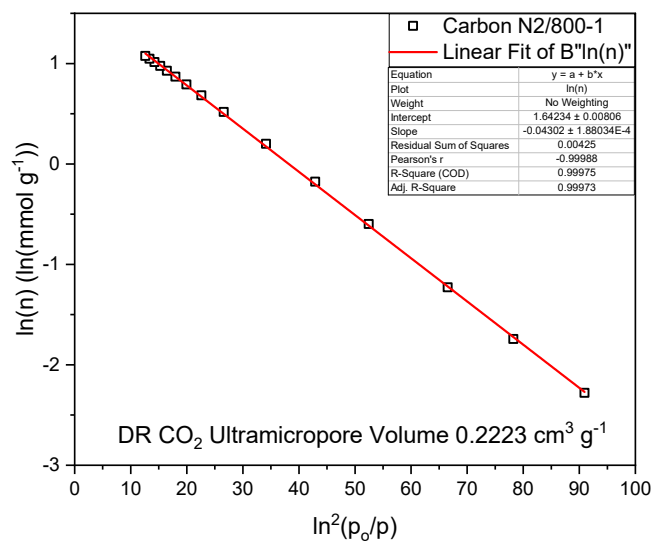

Figure S2. Dubinin-Radushkevich graphs for carbon dioxide adsorption at 0°C on carbons prepared in a nitrogen atmosphere a) Carbon N<sub>2</sub>/600-1, b) Carbon N<sub>2</sub>/700-1 and c) Carbon N<sub>2</sub>/800-1

### 1.1.3 Carbon Dioxide Adsorption Kinetic Profiles for the Series of Carbons Prepared under a Nitrogen Atmosphere

a)

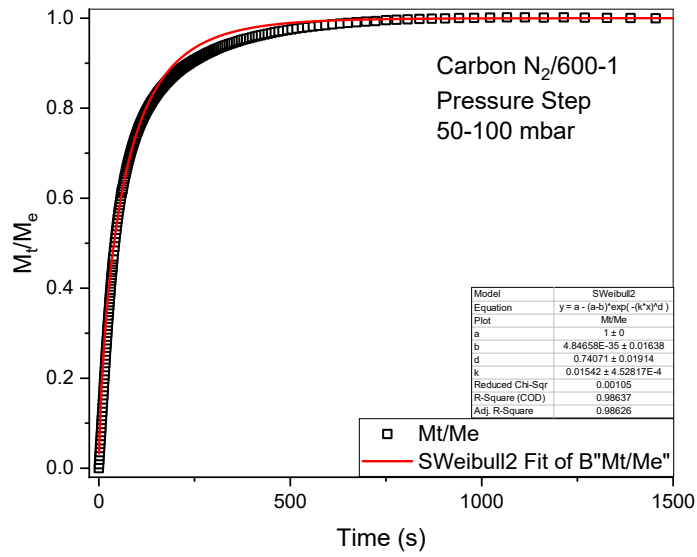

b)

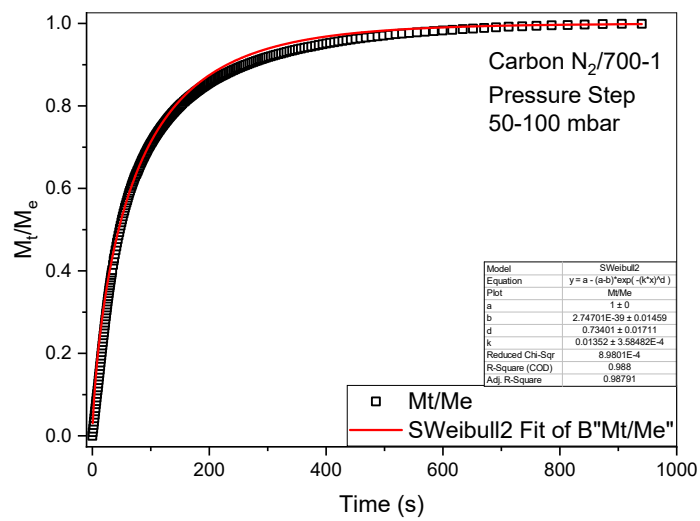

c)

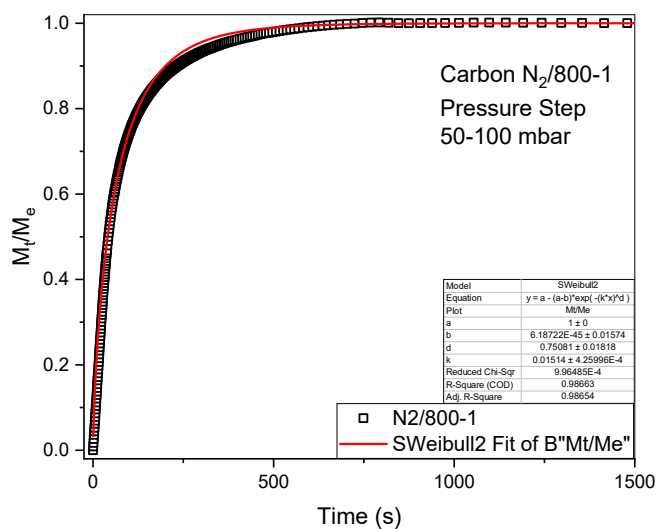

d)

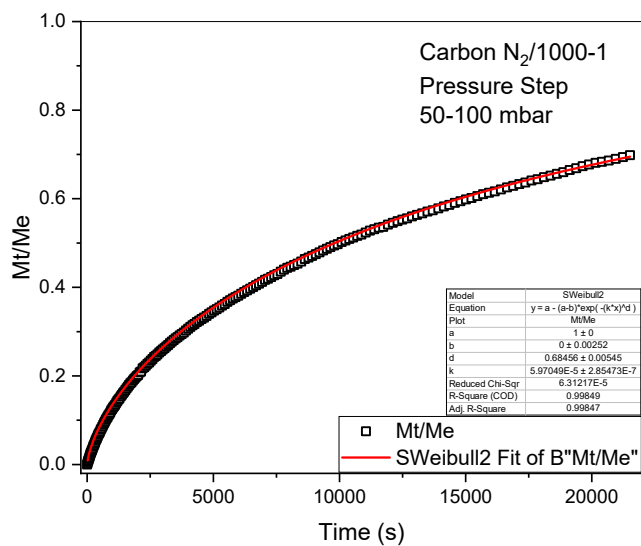

Figure S3 Adsorption kinetics for pressure step 50-100 mbar for CO<sub>2</sub> adsorption on carbons a) Carbon N<sub>2</sub>/600-1 (0°C), b) Carbon N<sub>2</sub>/700-1 (0°C), c) Carbon N<sub>2</sub>/800-1 (0°C) and d) Carbon N<sub>2</sub>/1000-1 (30°C).



## 1.2 Carbonization in a Carbon Dioxide Atmosphere (Series 2)

### 1.2.1 Nitrogen Adsorption and Desorption Isotherms at $-196^{\circ}\text{C}$ for the Series of Carbons prepared in a Carbon Dioxide Atmosphere

a)

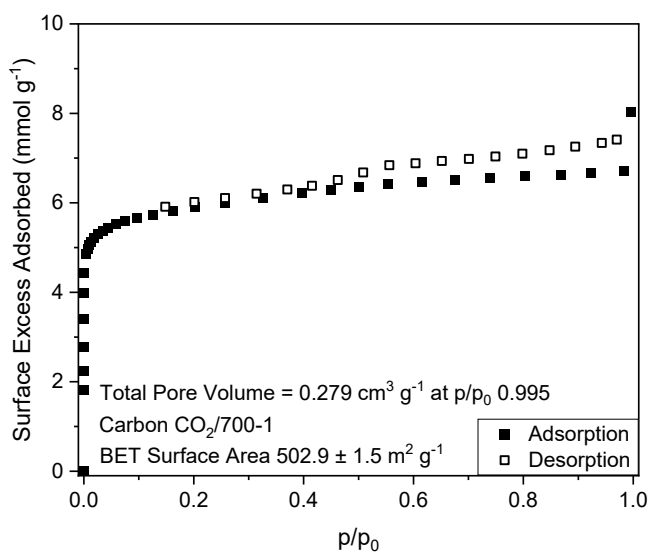

b)

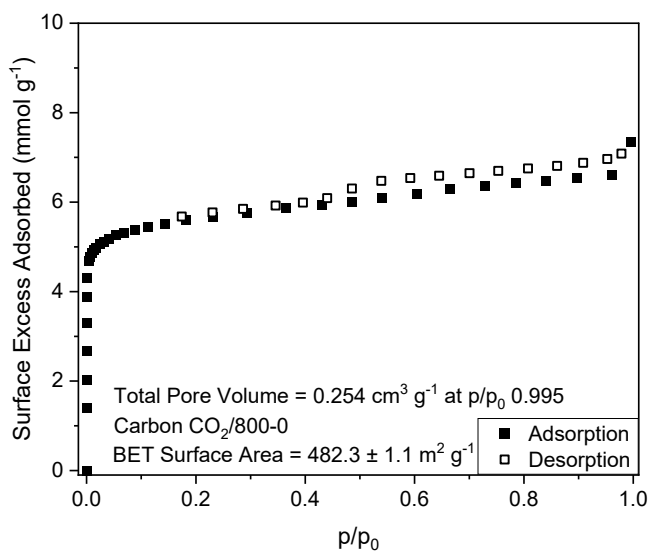

c)

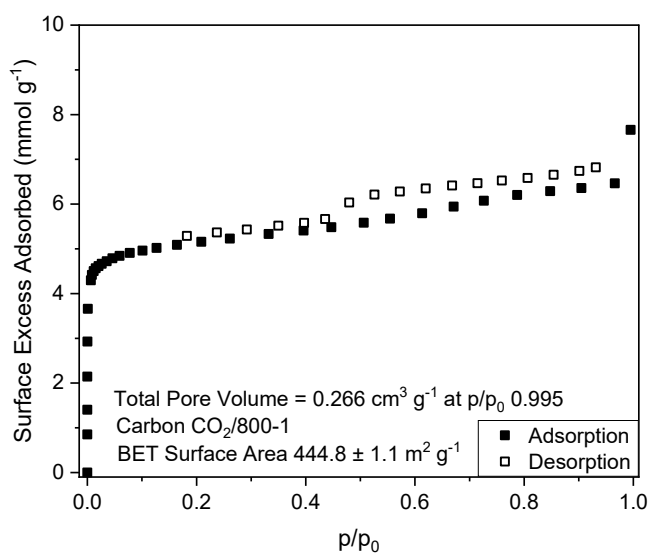

d)

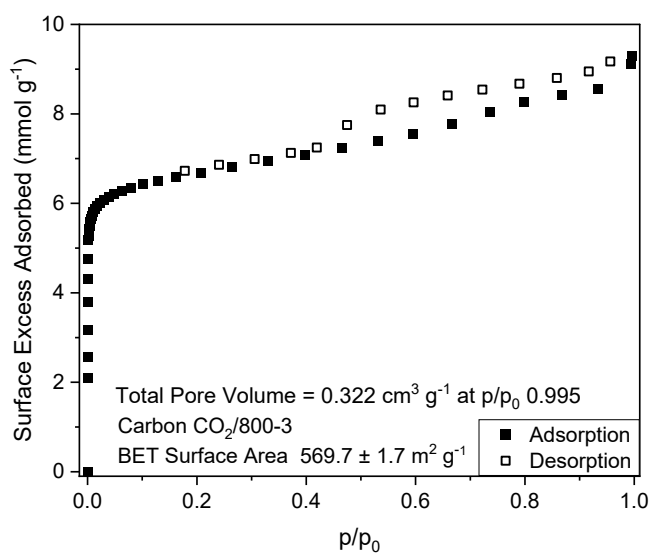

e)

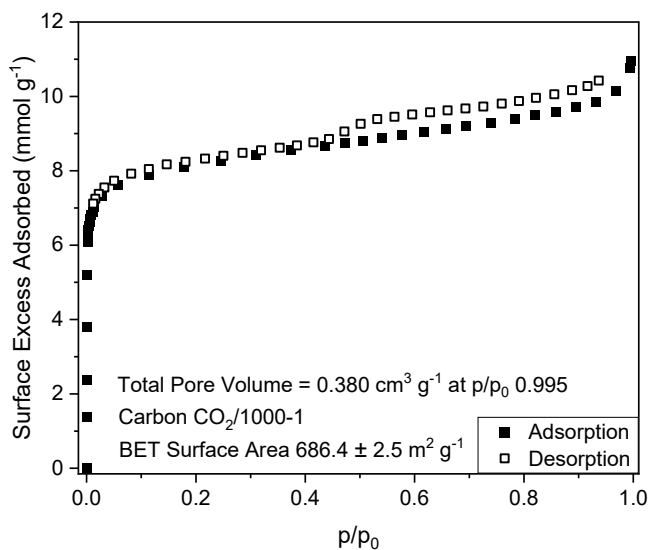

Figure S4. Nitrogen adsorption and desorption isotherms for carbons prepared in a carbon dioxide atmosphere at  $-196^{\circ}\text{C}$  a) Carbon  $\text{CO}_2/700-1$  b) Carbon  $\text{CO}_2/800-0$  c) Carbon  $\text{CO}_2/800-1$ , d) Carbon  $\text{CO}_2/800-3$  and e) Carbon  $\text{CO}_2/1000-1$

### 1.2.2. BET graphs and Mesopore Pore Size Distributions for Nitrogen Adsorption and Desorption at $-196^{\circ}\text{C}$ for the Series of Carbons prepared in a Carbon Dioxide Atmosphere

a)

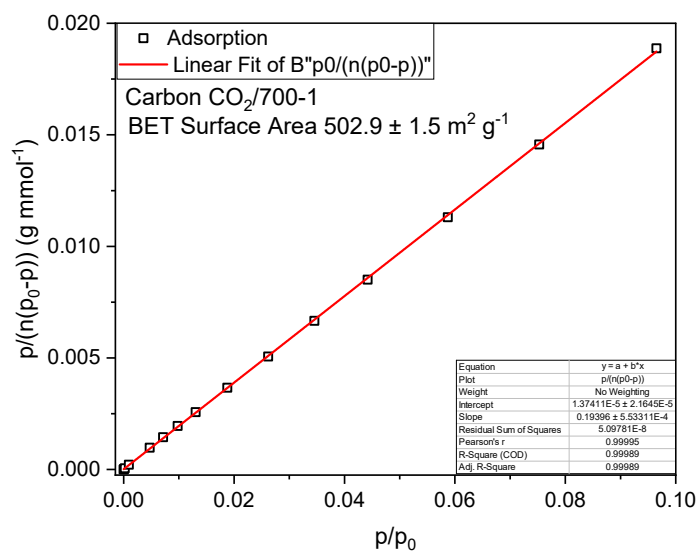

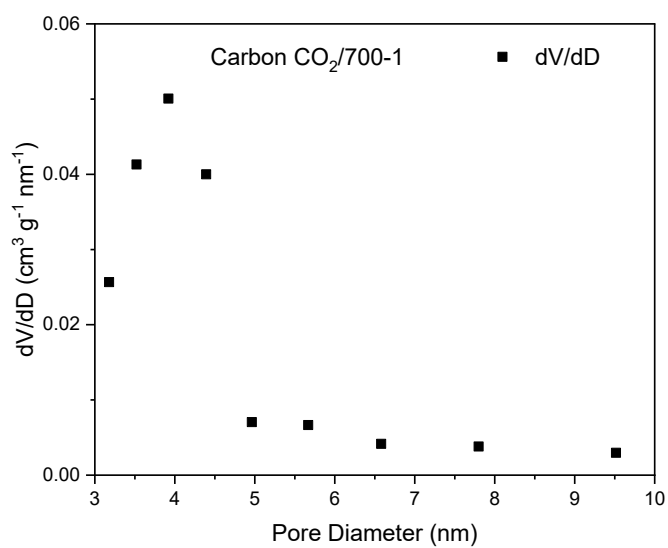

b)

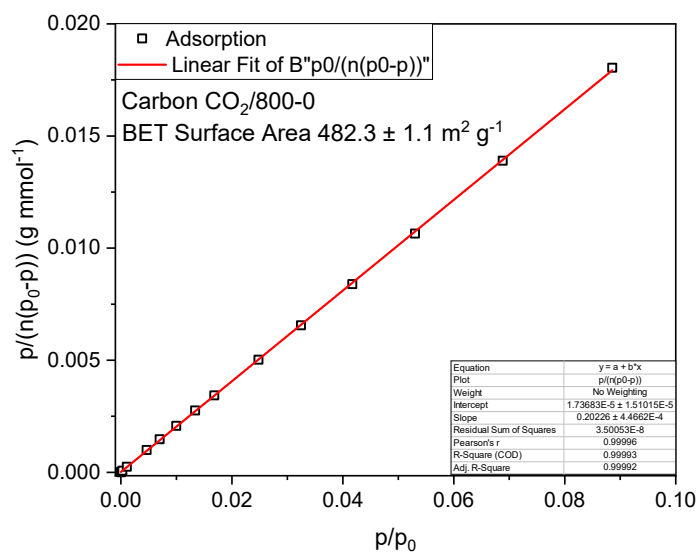

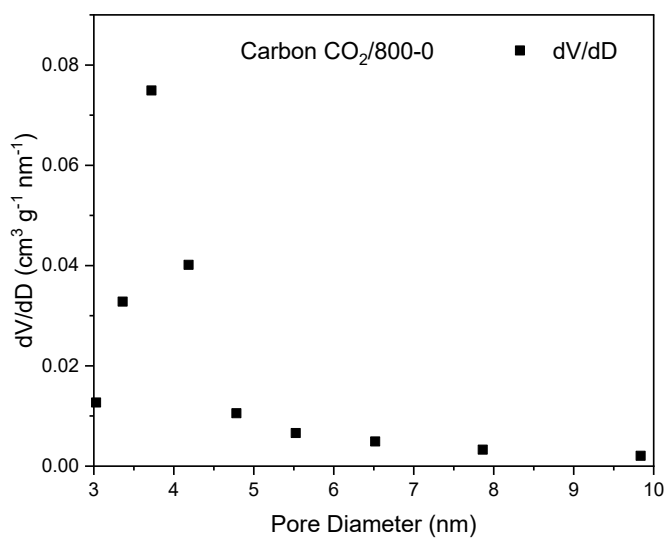

c)

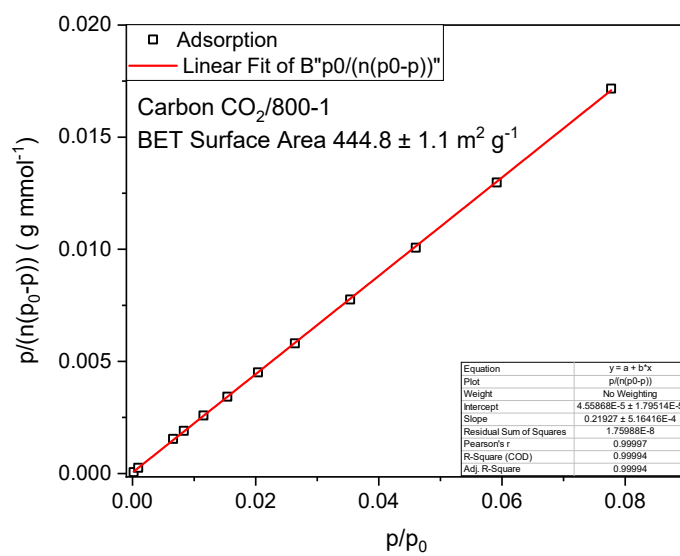

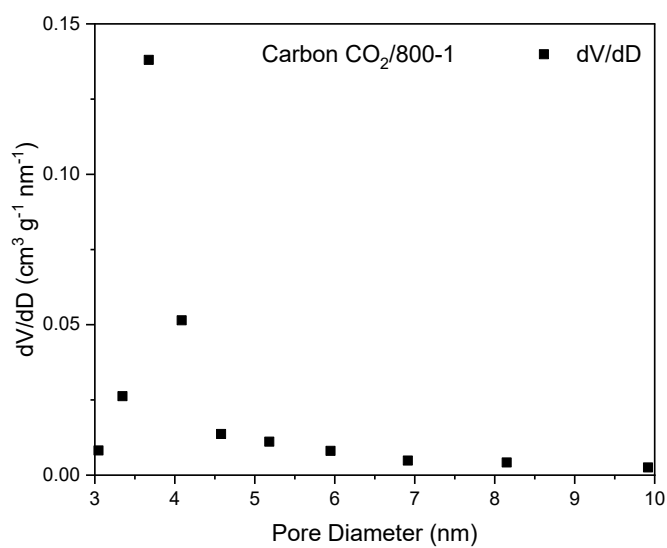

d)

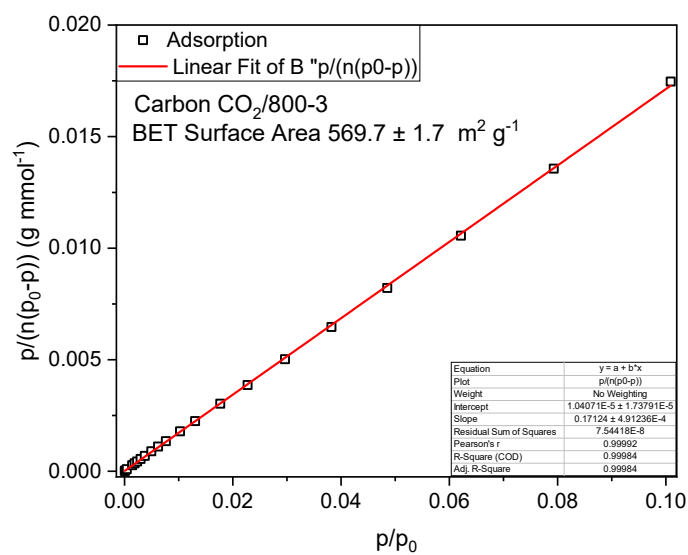

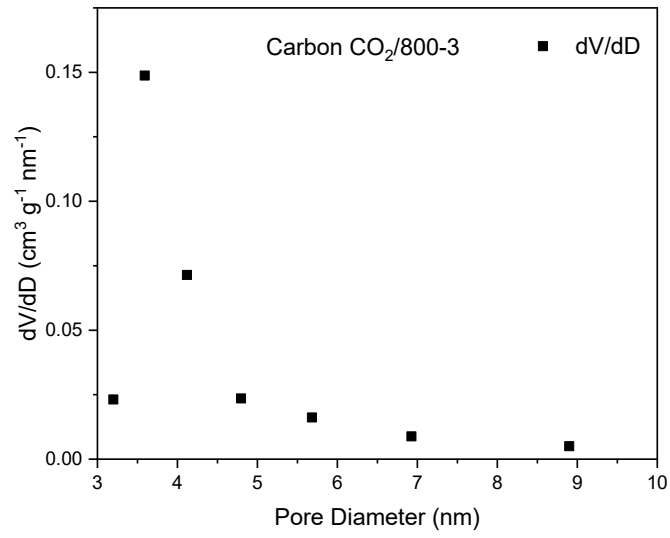

e)

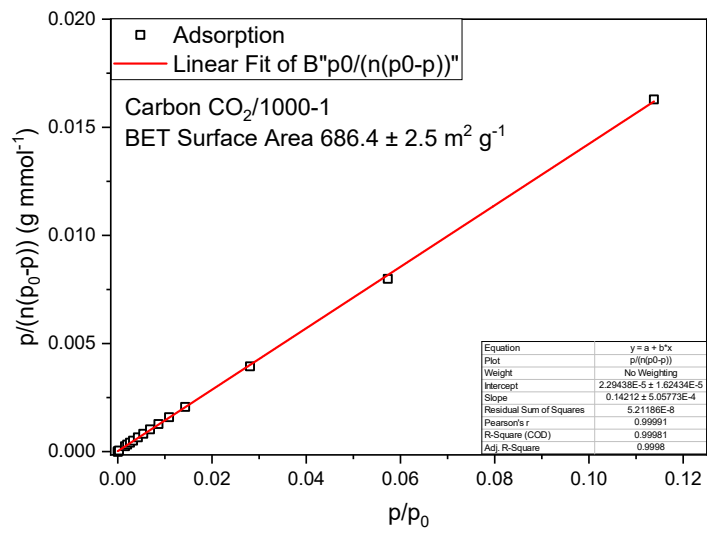

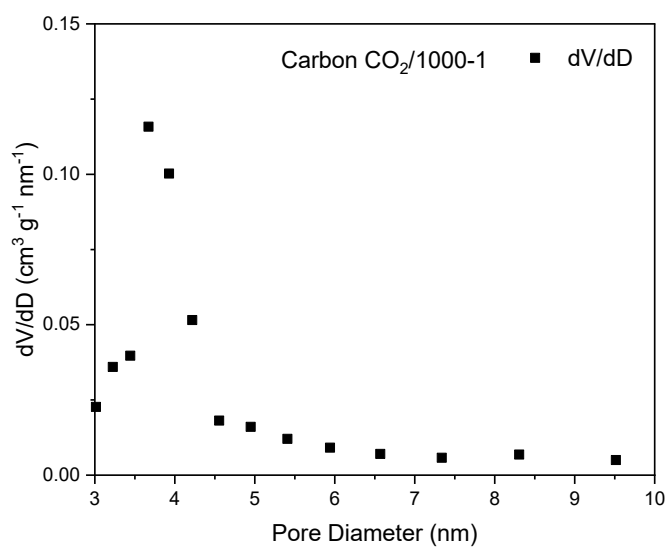

Figure S5. BET graphs and mesopore pore size distributions for nitrogen adsorption and desorption at  $-196^{\circ}\text{C}$  for carbons prepared in a carbon dioxide atmosphere a) Carbon  $\text{CO}_2/700-1$ , b) Carbon  $\text{CO}_2/800-0$  c) Carbon  $\text{CO}_2/800-1$ , d) Carbon  $\text{CO}_2/800-3$  and e) Carbon  $\text{CO}_2/1000-1$



### 1.2.3 Dubinin-Radushkevich graphs for nitrogen adsorption at -196°C for the Series of Carbons prepared in a Carbon Dioxide Atmosphere

a)

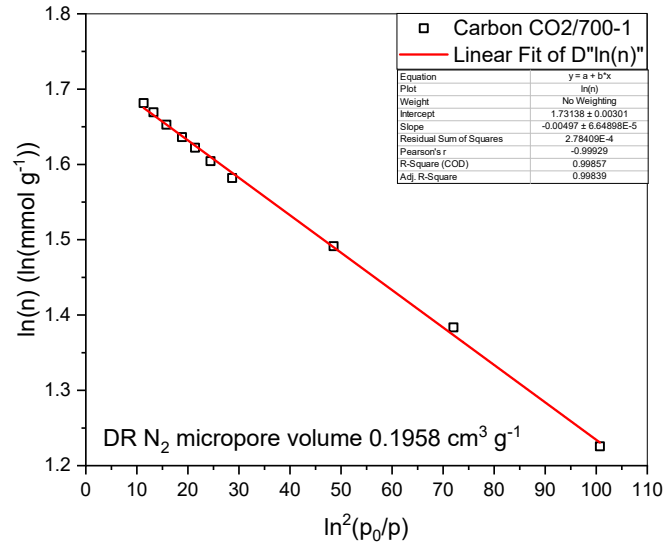

b)

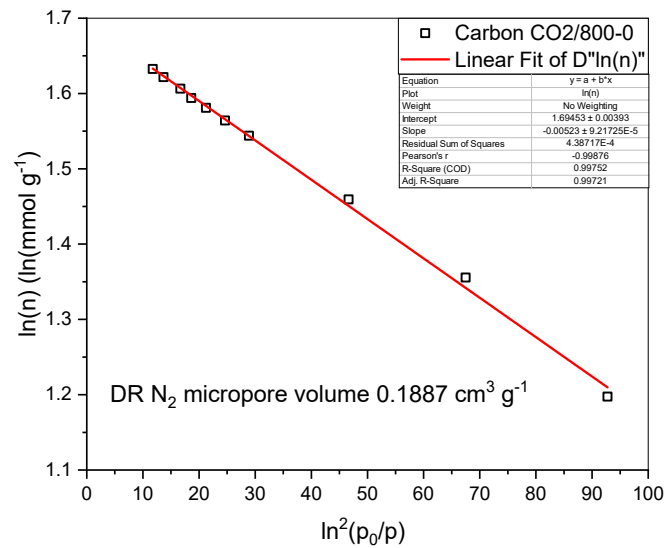

c)

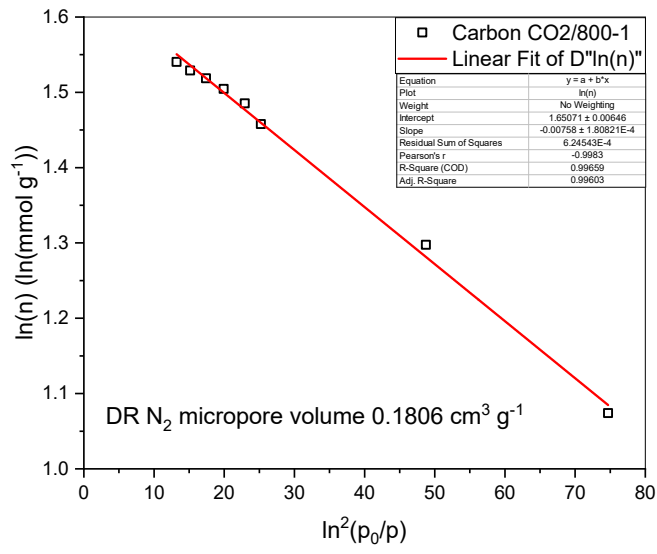

d)

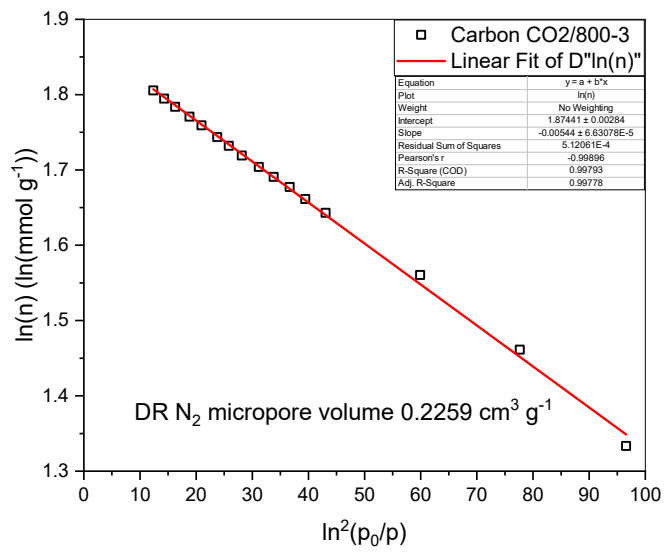

e)

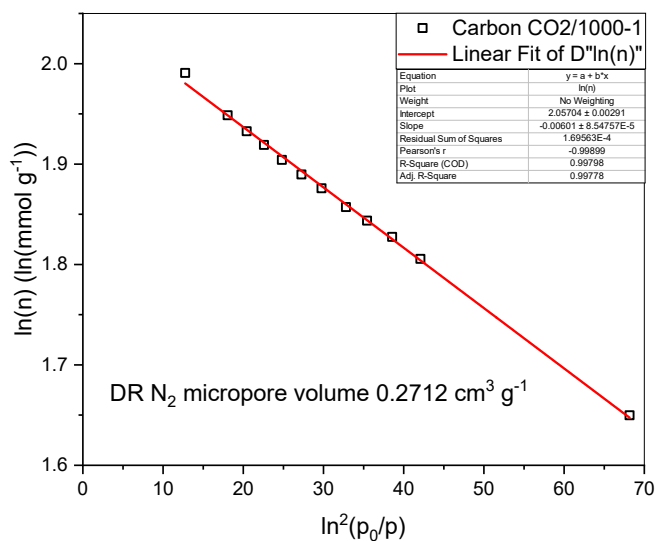

Figure S6. Dubinin-Radushkevich graphs for nitrogen adsorption at -196°C on carbons prepared in a carbon dioxide atmosphere a) Carbon CO<sub>2</sub>/700-1, b) Carbon CO<sub>2</sub>/800-0, c) Carbon CO<sub>2</sub>/800-1, d) Carbon CO<sub>2</sub>/800-3 and e) Carbon CO<sub>2</sub>/1000-1

### 1.2.4 CO<sub>2</sub> Adsorption and Desorption Isotherms at 0°C for the Carbons prepared in a Carbon Dioxide Atmosphere

a)

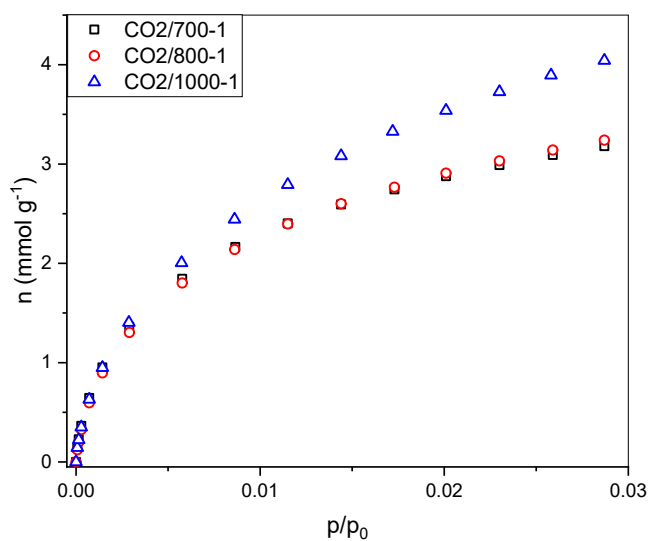

b)

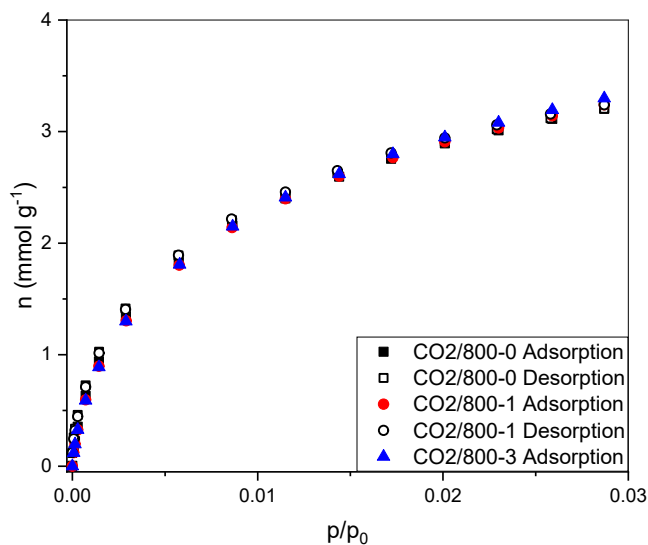

Figure S7. Carbon dioxide adsorption and desorption isotherms at 0°C for carbons prepared in a CO<sub>2</sub> atmosphere a) The effect of HTT and b) The effect of hold time at HTT 800°C.

### 1.2.5 Dubinin-Radushkevich graphs for Carbon Dioxide Adsorption at 0°C for the Series of Carbons prepared in a Carbon Dioxide Atmosphere

a)

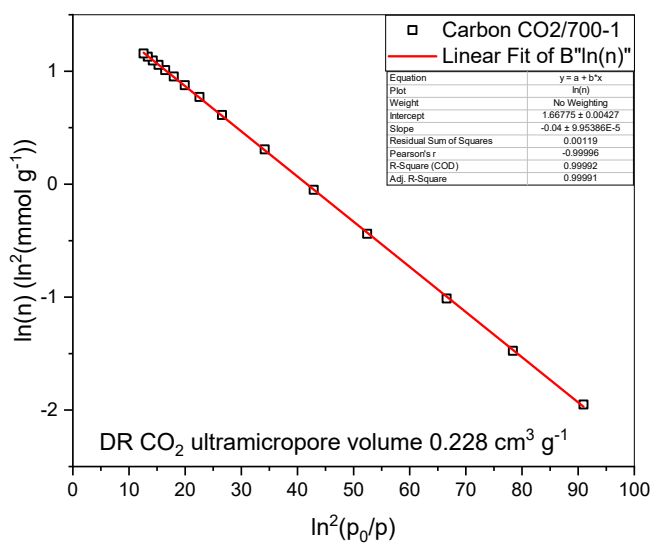

b)

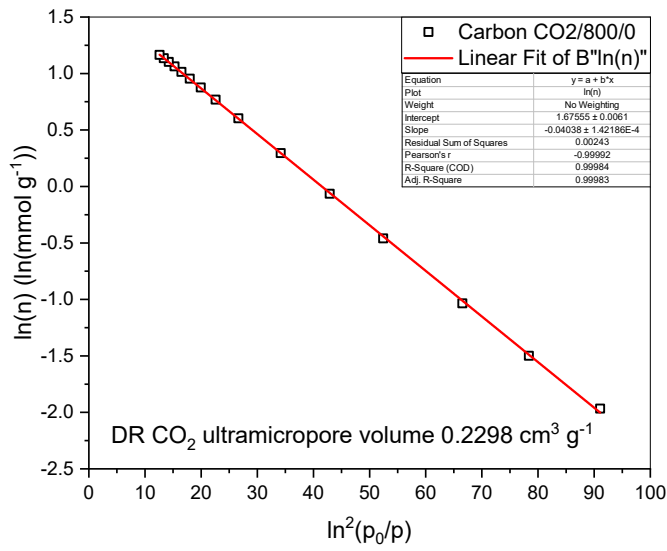

c)

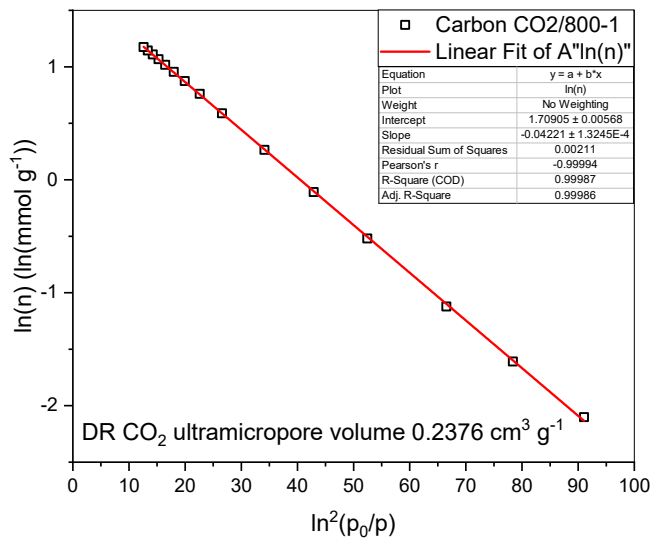

d)

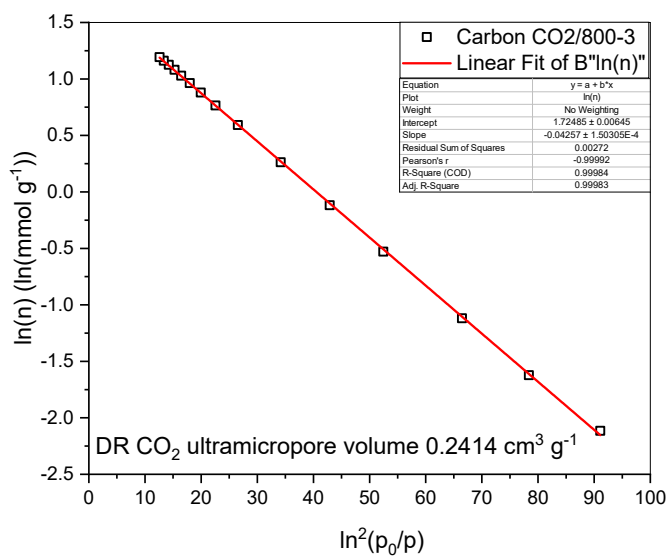

e)

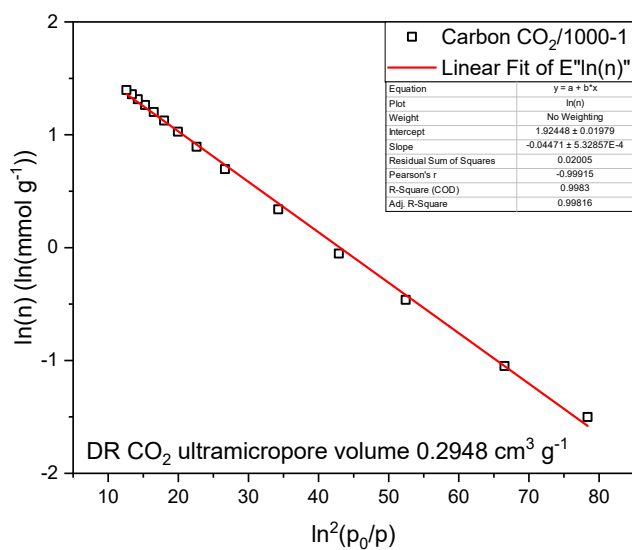

Figure S8. Dubinin-Radushkevich graphs for CO<sub>2</sub> adsorption at 0°C on carbons prepared in a carbon dioxide atmosphere a) Carbon CO<sub>2</sub>/700-1, b) Carbon CO<sub>2</sub>/800-0, c) Carbon CO<sub>2</sub>/800-1, d) Carbon CO<sub>2</sub>/800-3 and e) Carbon CO<sub>2</sub>/1000-1

## 1.3 Chemical Treatment of Carbon for Functional Group Modification

### 1.3.1 Nitrogen Adsorption at -196°C for Functionalized Carbons

a)

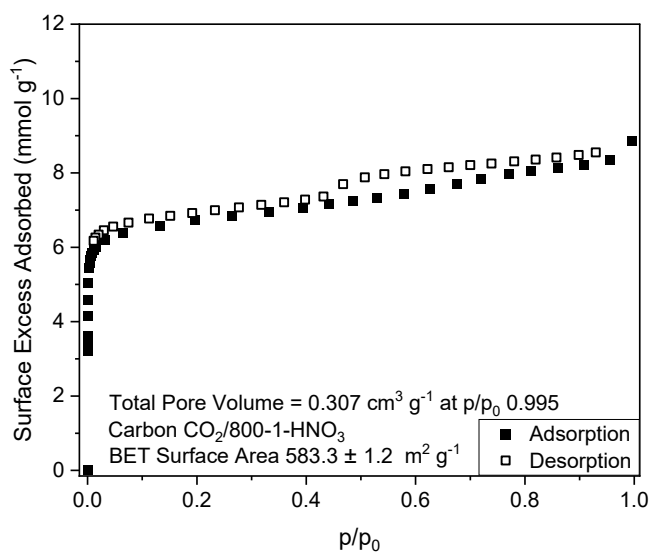

b)

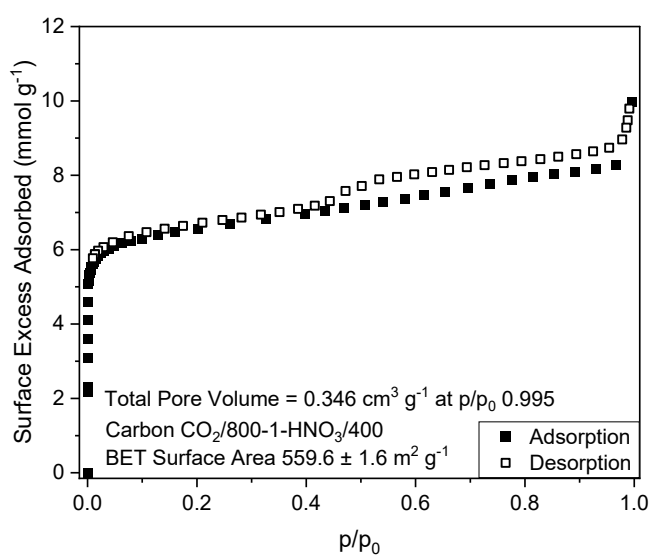

c)

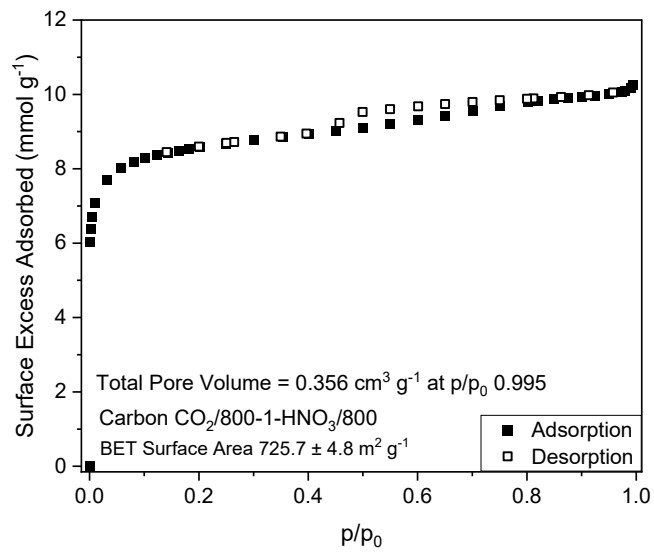

d)

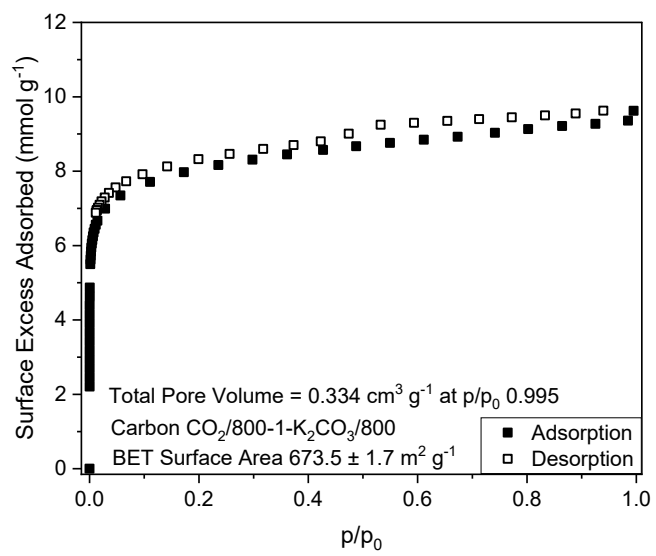



e)

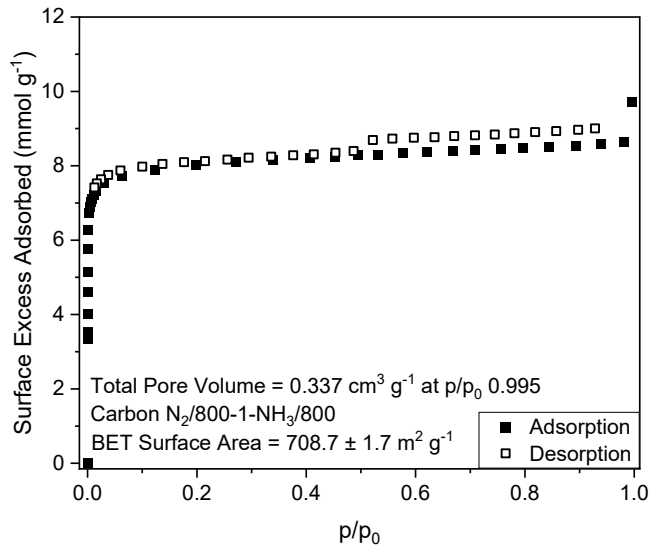

Figure Nitrogen adsorption and desorption isotherms at  $-196^\circ\text{C}$  for functionalized carbons a) Carbon  $\text{CO}_2/800-1-\text{HNO}_3$  b) Carbon  $\text{CO}_2/800-1-\text{HNO}_3/400$  c) Carbon  $\text{CO}_2/800-1-\text{HNO}_3/800$ , d) Carbon  $\text{CO}_2/800-1-\text{K}_2\text{CO}_3/800$  and e) Carbon  $\text{N}_2/800-1-\text{NH}_3/800$

### 1.3.2. BET graphs and Mesopore Pore Size Distributions for Nitrogen Adsorption at $-196^\circ\text{C}$ on Functionalized Carbons

a)

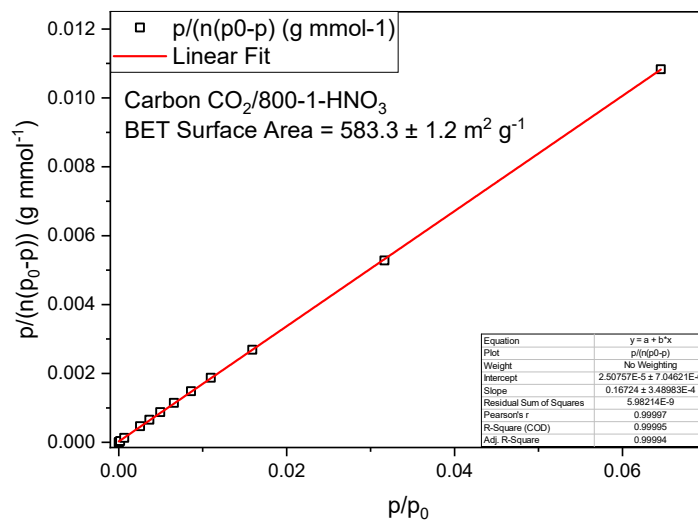

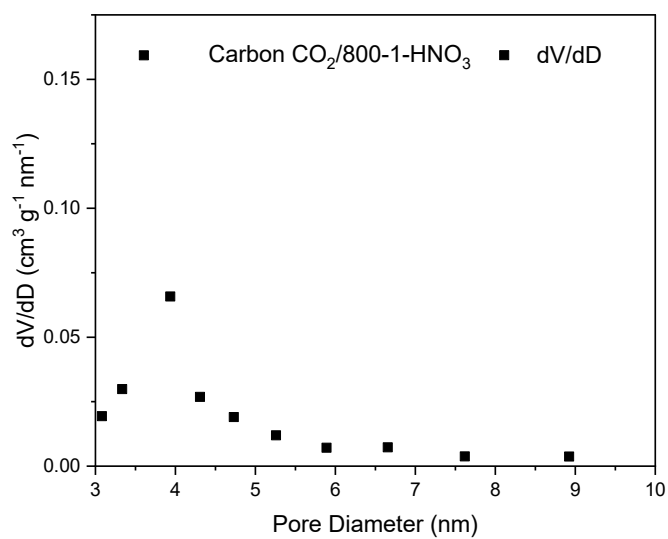

b)

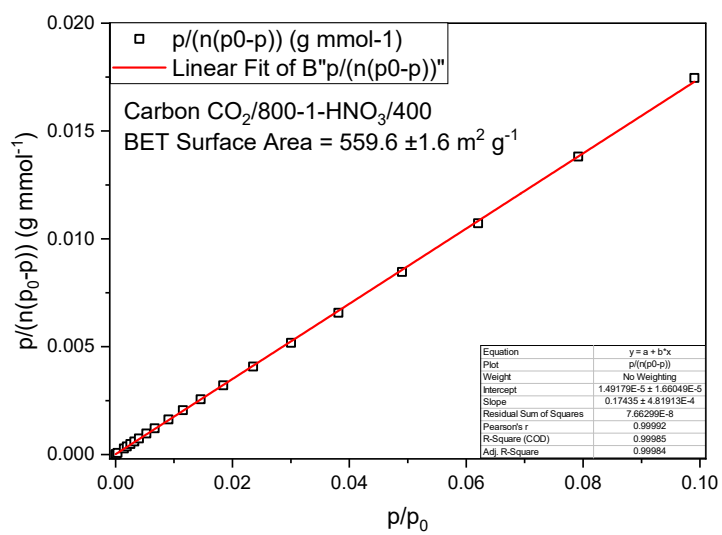

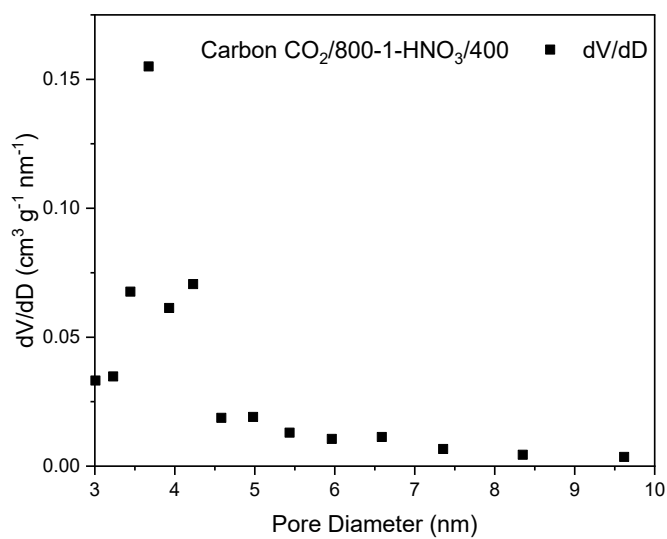

c)

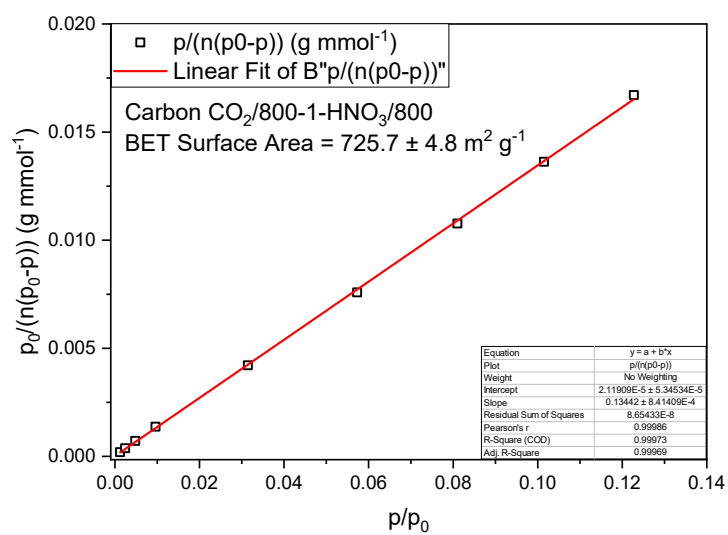

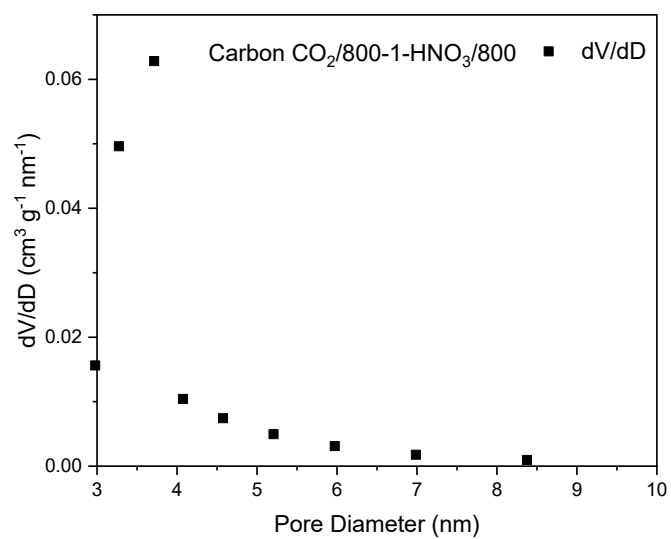

d)

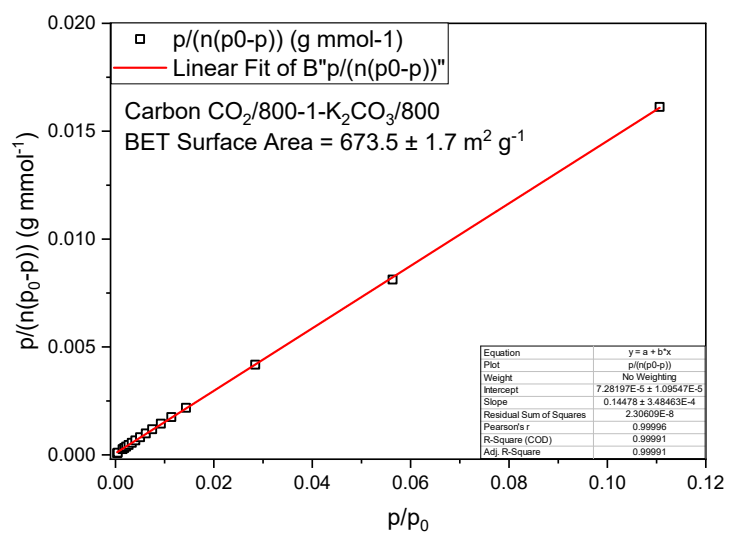

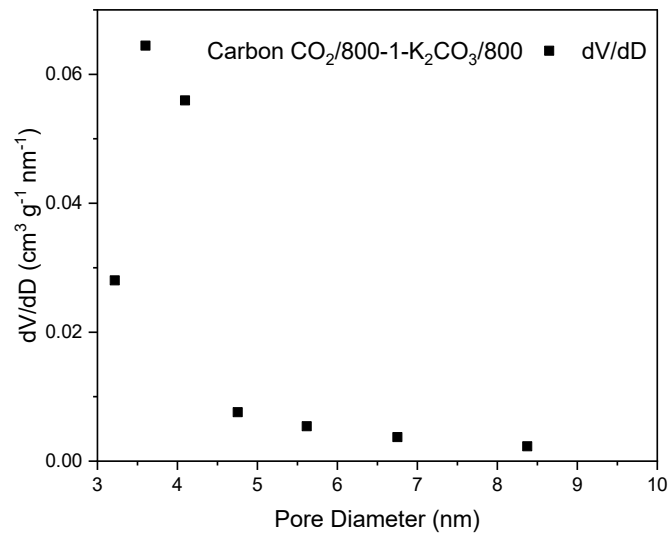

e)

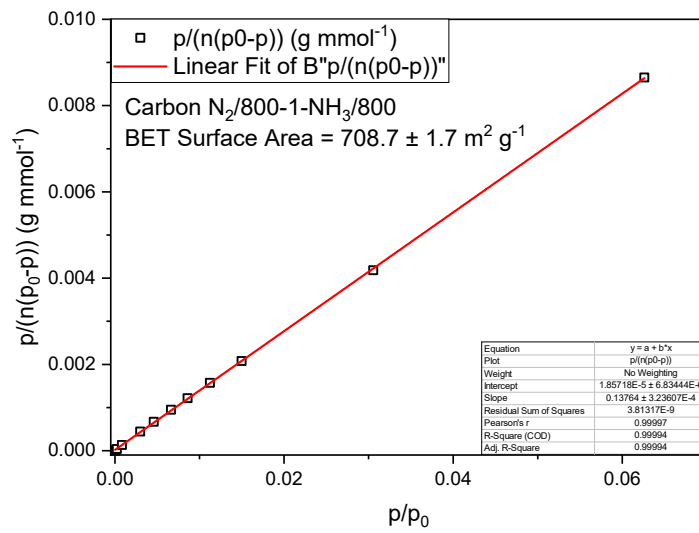

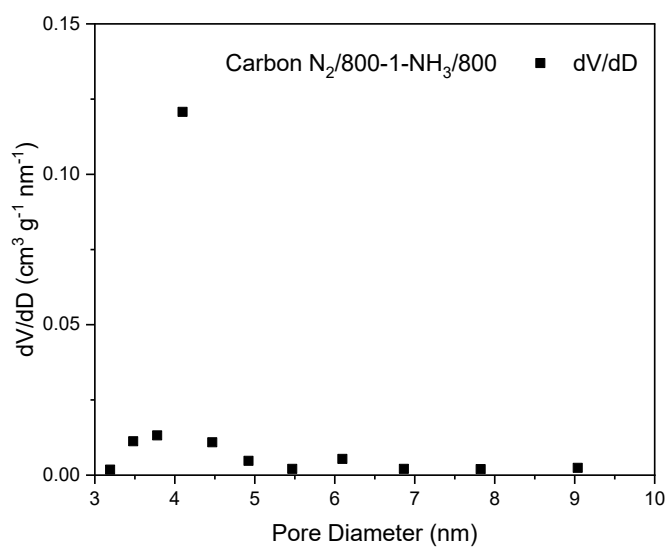

Figure S10. BET and mesopore pore size distribution graphs for nitrogen adsorption isotherms at  $-196^{\circ}\text{C}$  for functionalized carbons a) Carbon  $\text{CO}_2/800\text{-1-HNO}_3$  b) Carbon  $\text{CO}_2/800\text{-1-HNO}_3/400$  c) Carbon  $\text{CO}_2/800\text{-1-HNO}_3/800$ , d) Carbon  $\text{CO}_2/800\text{-1-K}_2\text{CO}_3/800$  and e) Carbon  $\text{N}_2/800\text{-1-NH}_3/800$

### 1.3.3. Dubinin-Radushkevich graphs for Nitrogen Adsorption at -196°C on Functionalized Carbons

a)

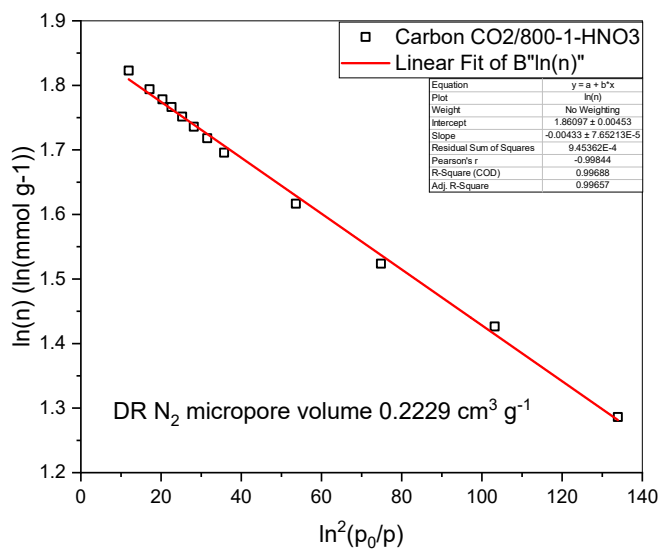

b)

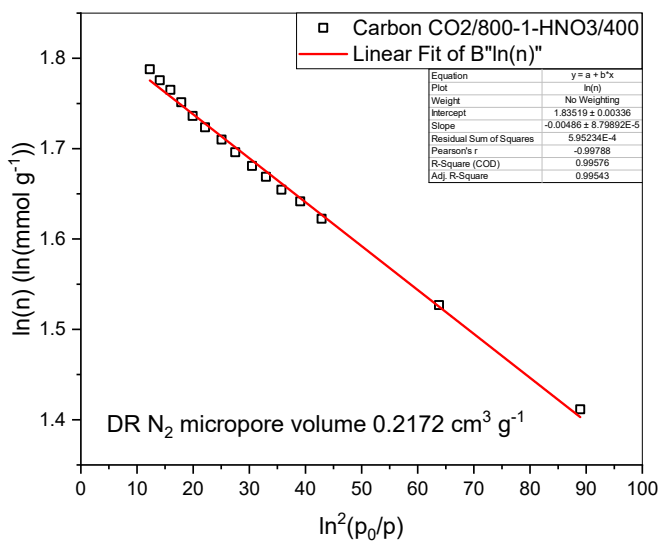

c)

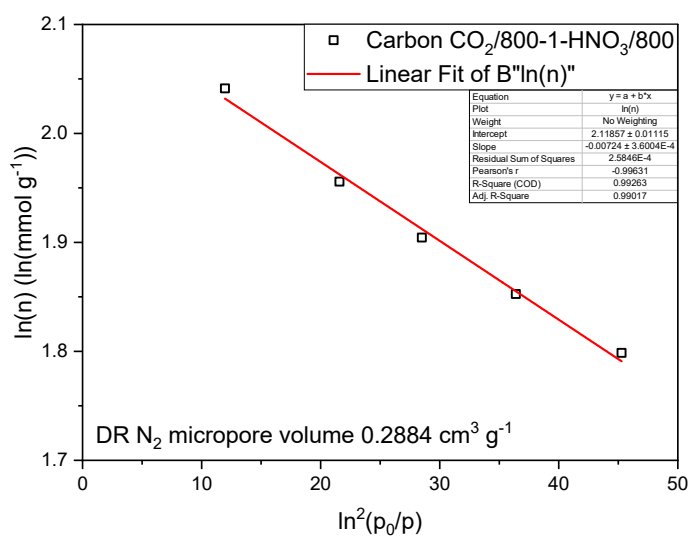

d)

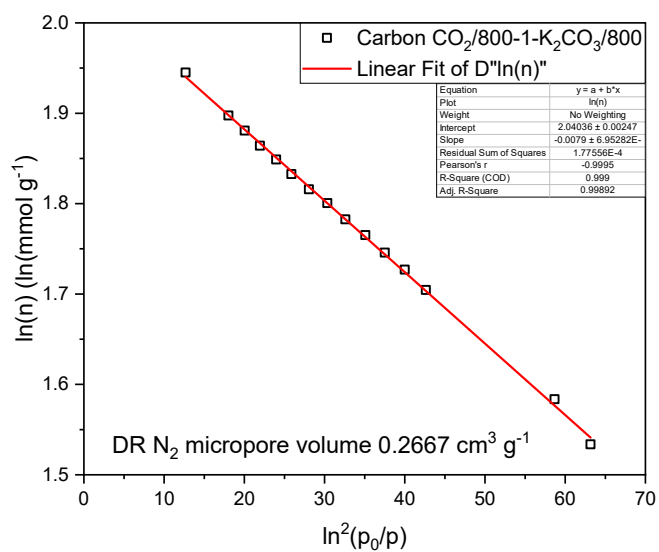



e)

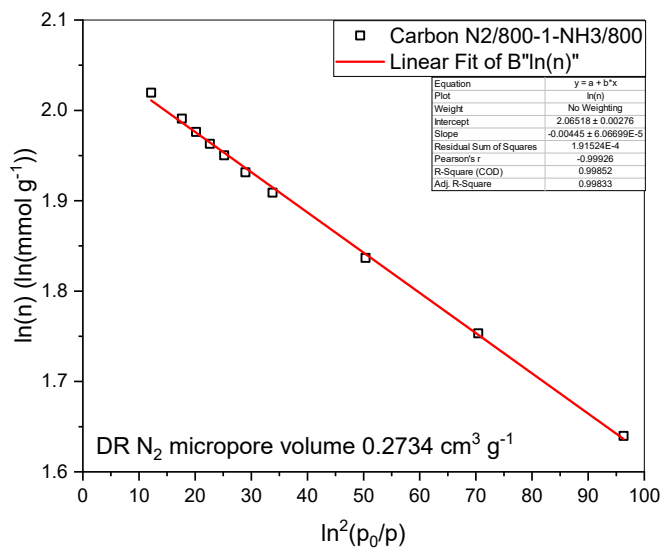

Figure S11. Dubinin-Radushkevich graphs for nitrogen adsorption at -196°C for functionalized carbons a) Carbon CO<sub>2</sub>/800-1-HNO<sub>3</sub> b) Carbon CO<sub>2</sub>/800-1-HNO<sub>3</sub>/400 c) Carbon CO<sub>2</sub>/800-1-HNO<sub>3</sub>/800, d) Carbon CO<sub>2</sub>/800-1-K<sub>2</sub>CO<sub>3</sub>/800 and e) Carbon N<sub>2</sub>/800-1-NH<sub>3</sub>/800

### 1.3.4 Carbon Dioxide Adsorption Isotherms at 0°C for Functionalized Carbons

a)

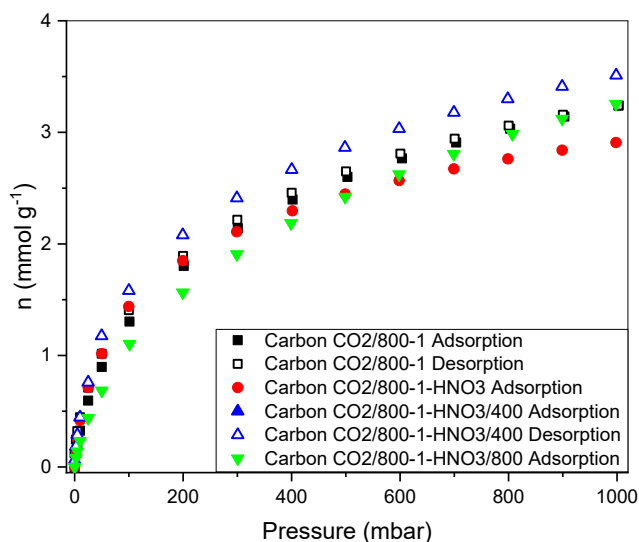

b)

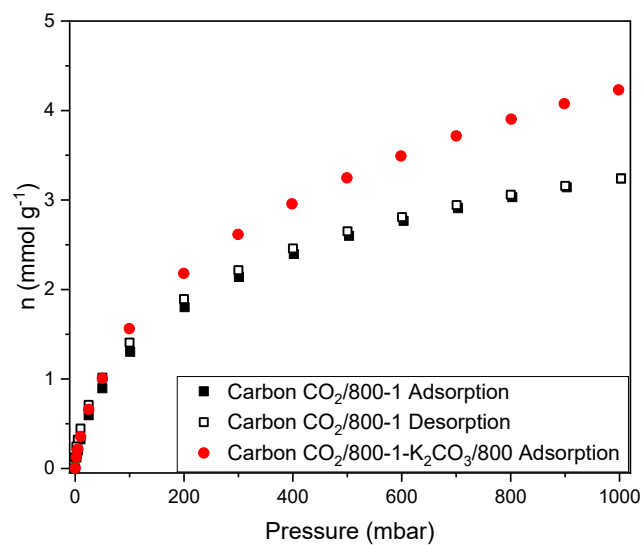

c)

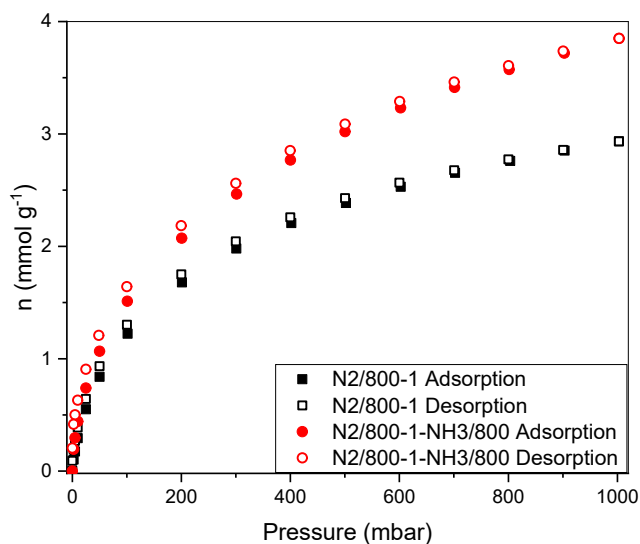

Figure S12. Carbon dioxide adsorption isotherms for functionalized carbons at 0°C a) Nitric acid oxidized carbon CO<sub>2</sub>/800-1 and heat-treated carbon series, b) Comparison of Carbons CO<sub>2</sub>/800-1 and CO<sub>2</sub>/800-1-K<sub>2</sub>CO<sub>3</sub>/800 and c) Comparison of Carbons N<sub>2</sub>/800-1 and N<sub>2</sub>/800-1-NH<sub>3</sub>/800

### 1.3.5 Dubinin-Radushkevich graphs for Carbon Dioxide Adsorption at 0°C for Functionalized Carbons

a)

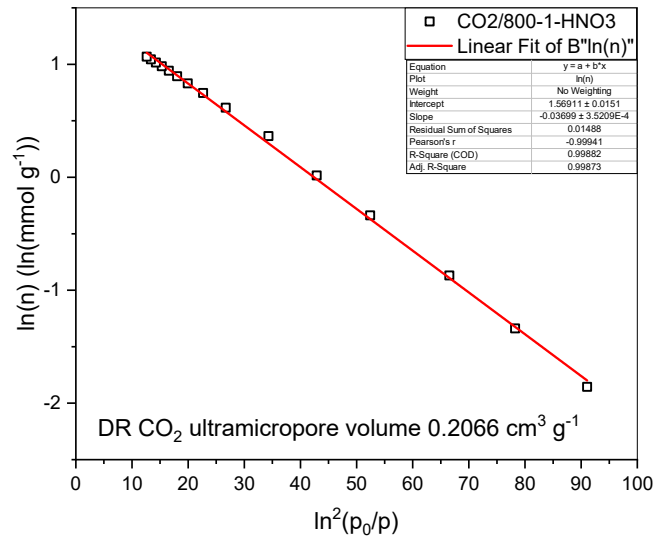

b)

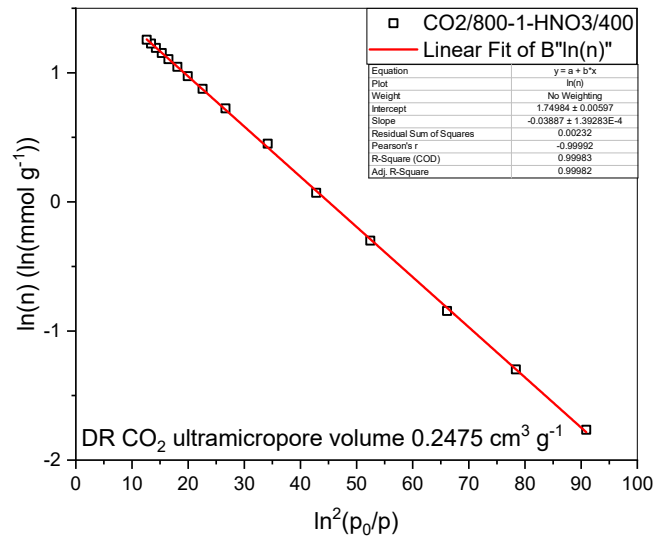

c)

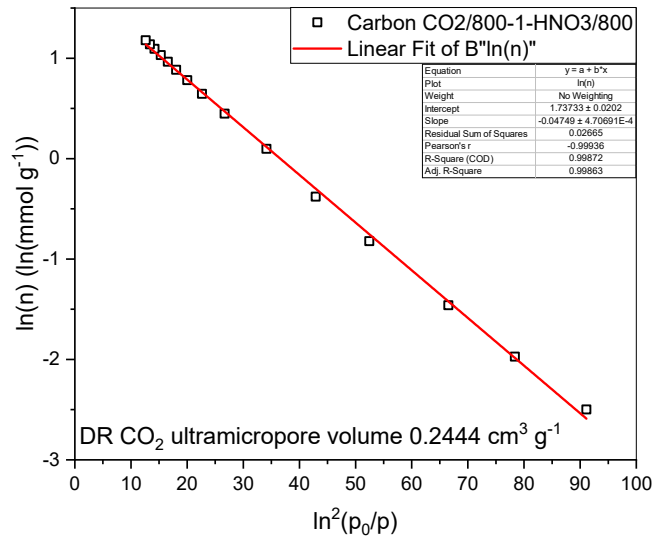

d)

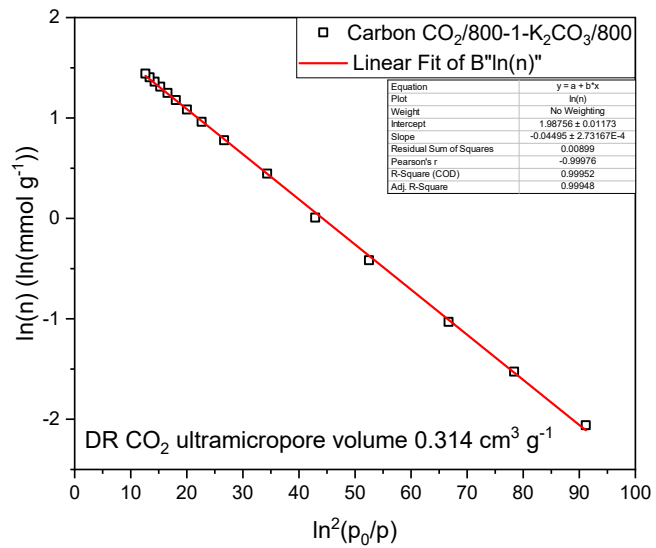

e)

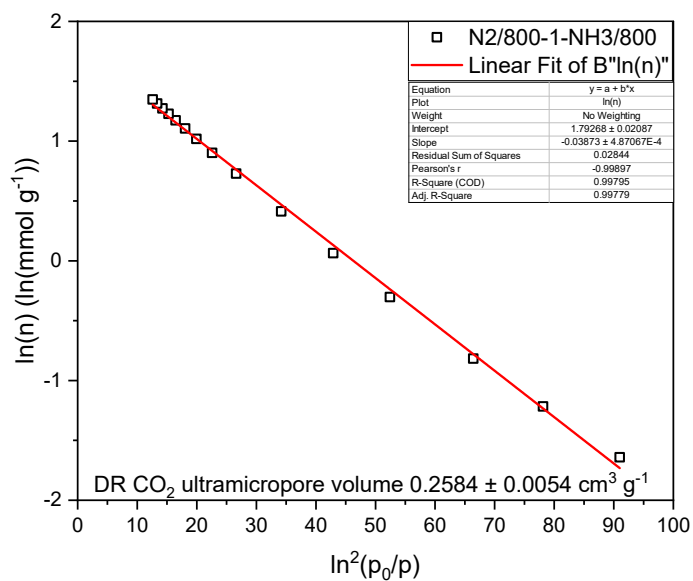

f)

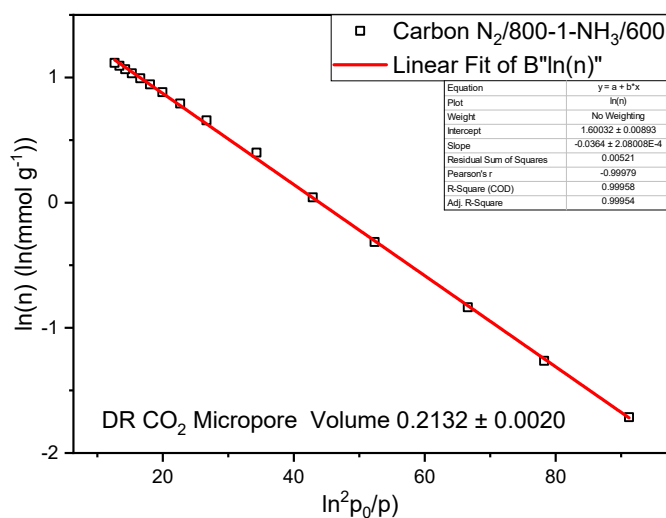

Figure S13 Dubinin-Radushkevich graphs for carbon dioxide adsorption at 0°C for functionalized carbons a) Carbon CO<sub>2</sub>/800-1-HNO<sub>3</sub> b) Carbon CO<sub>2</sub>/800-1-HNO<sub>3</sub>/400 c) Carbon CO<sub>2</sub>/800-1-HNO<sub>3</sub>/800, d) Carbon CO<sub>2</sub>/800-1-K<sub>2</sub>CO<sub>3</sub>/800 and e) Carbon N<sub>2</sub>/800-1-NH<sub>3</sub>/800 and f) Carbon N<sub>2</sub>/800-1-NH<sub>3</sub>/600

## 1.4 Comparison of Gas Adsorption Parameters

a)

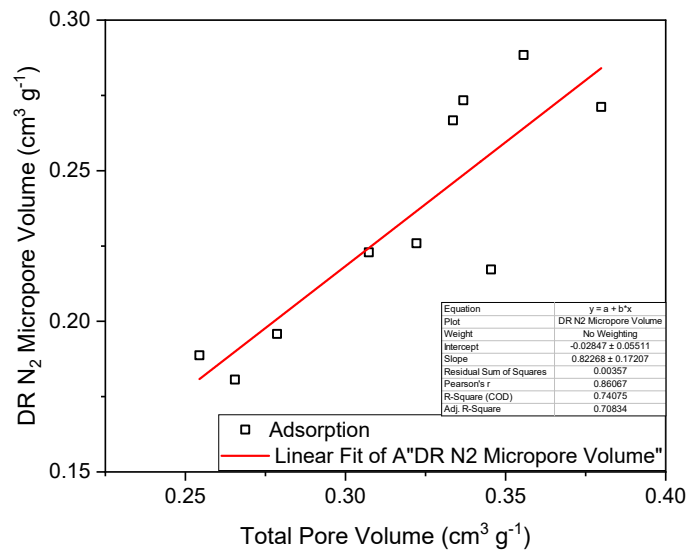

b)

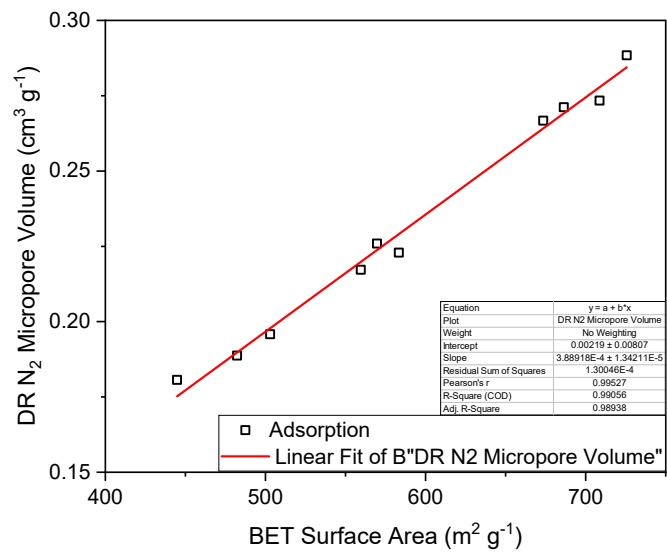

c)

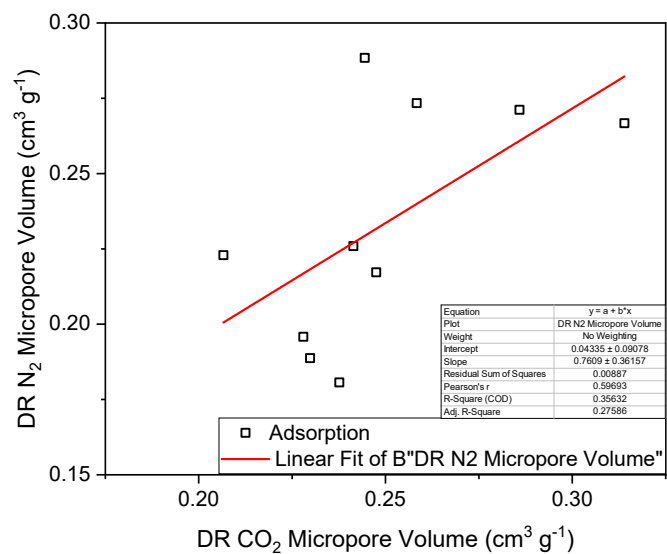

Figure S14 Comparison of adsorption parameters a) DR N<sub>2</sub> Micropore Volume versus Total Pore Volume; b) DR N<sub>2</sub> Micropore Volume versus BET Surface Area and c) DR N<sub>2</sub> Micropore Volume versus DR CO<sub>2</sub> Micropore Volume

## 2 Electrochemistry

### 2.1 Cyclic Voltammetry

#### 2.1.1 Comparison of Cyclic Voltammograms with a Sweep Rate of $20\text{mV s}^{-1}$ for Carbon/PVDF Electrodes made from Carbons prepared in Nitrogen and Carbon Dioxide Atmospheres

a)

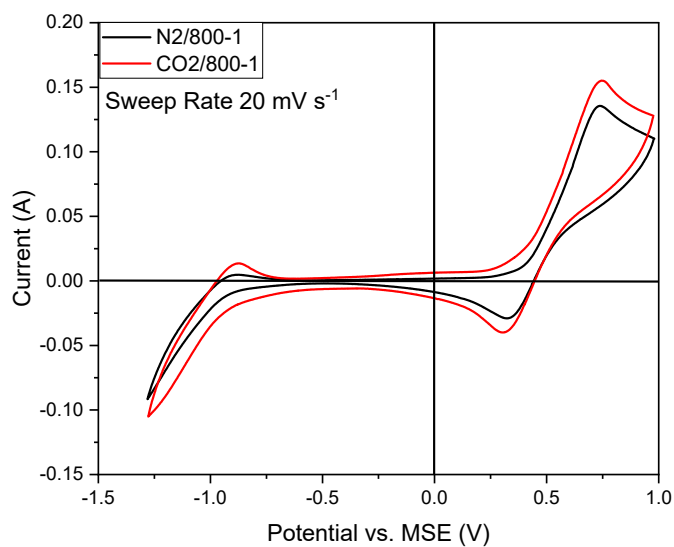

b)

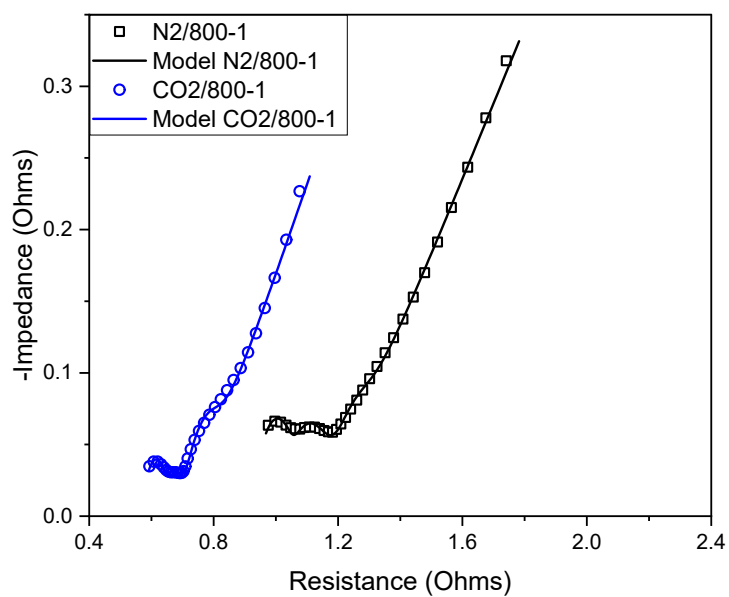



c)

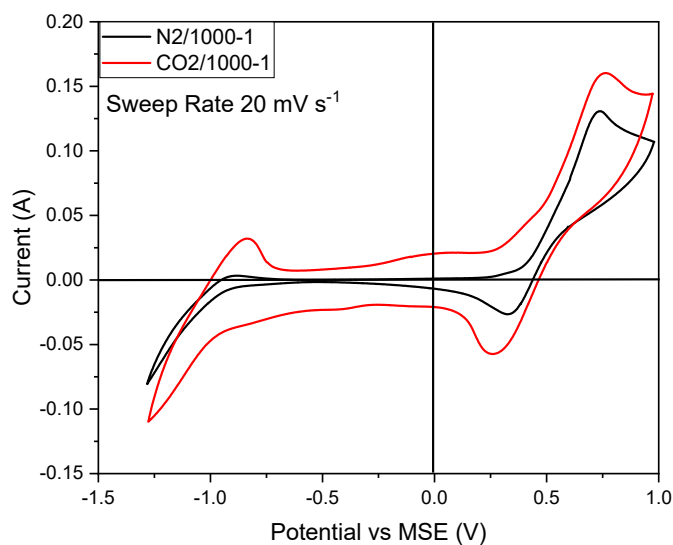

d)

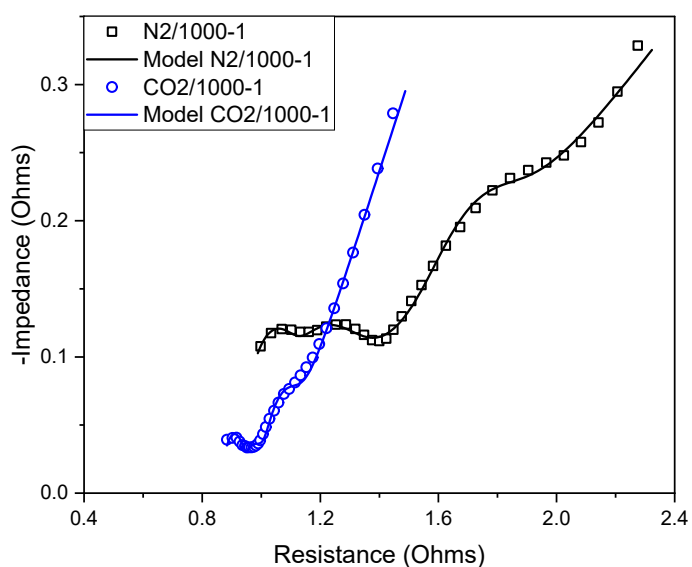

Figure S15 Comparison of cyclic voltammograms (CVs) and Nyquist graphs for vanadium redox reactions for electrodes fabricated from PVDF and carbons prepared under both nitrogen and carbon dioxide atmospheres at various temperatures a) CVs for electrodes with Carbons (HTT 800°C), b) Nyquist graphs for electrodes with Carbons (HTT 800°C), c) CVs for electrodes with Carbons (HTT 1000°C) and d) Nyquist graphs for electrodes with Carbons (HTT 1000°C)

## 2.1.2 Comparison of Cyclic Voltammograms for Carbon Electrodes as a Function of Sweep Rates for Carbons with a Range of Heat Treatment Temperatures

a)

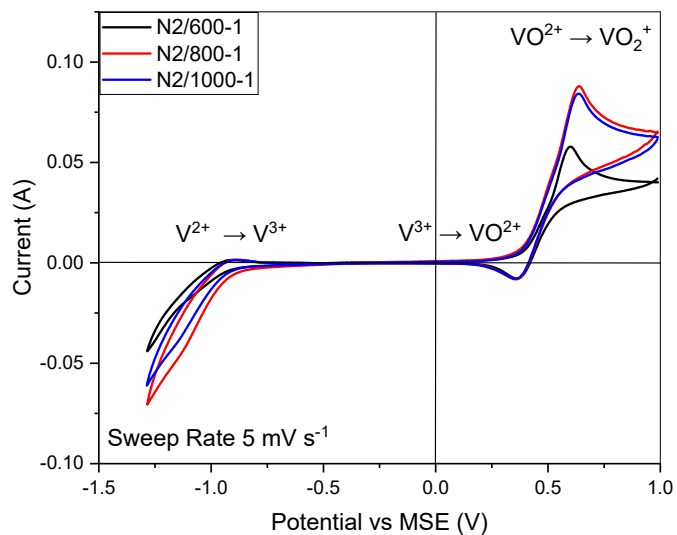

b)

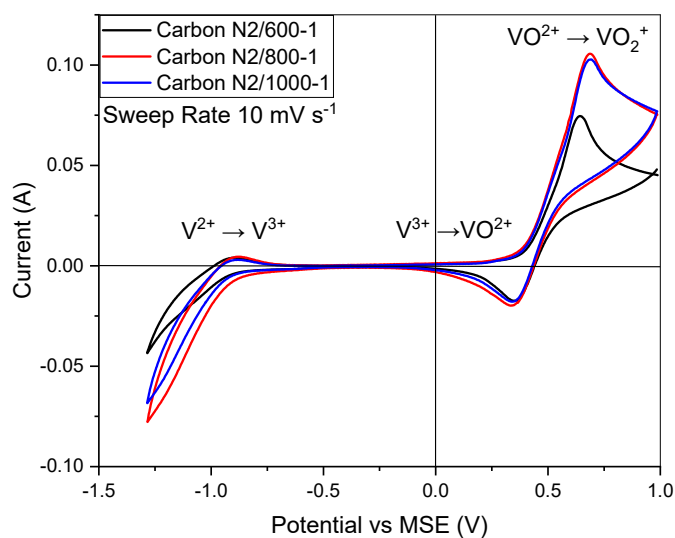

Figure S16. Comparison of cyclic voltammograms for vanadium redox reactions with carbon composite electrodes from carbonization in Nitrogen a) Sweep Rate 5mV s<sup>-1</sup> and b) Sweep rate 10 mV s<sup>-1</sup>

a)

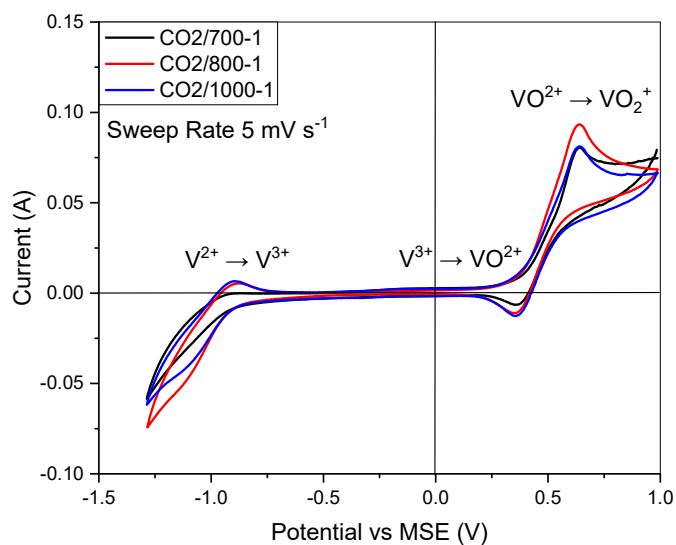

b)

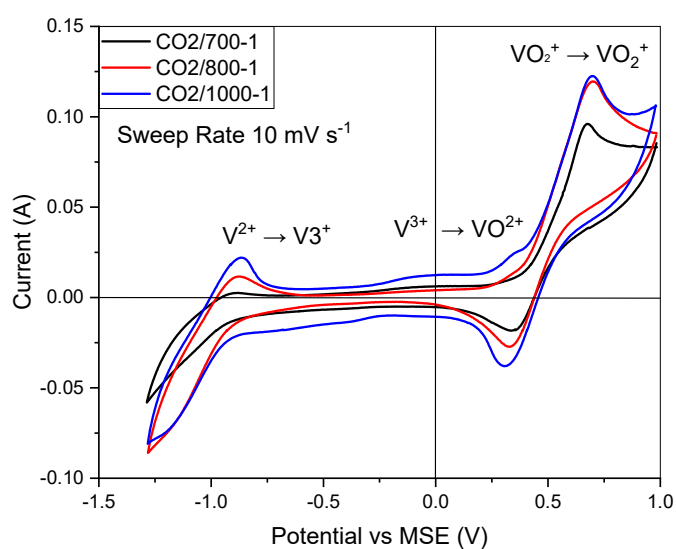

Figure S17. Comparison of cyclic voltammograms for vanadium redox reactions with carbon/PVDF composite electrodes made from carbons prepared in carbon dioxide atmosphere at various heat treatment temperatures a) Sweep Rate  $5 \text{ mV s}^{-1}$  and b) Sweep Rate  $10 \text{ mV s}^{-1}$ .

### 2.1.3 Cyclic Voltammograms as a Function of Sweep Rate

a)

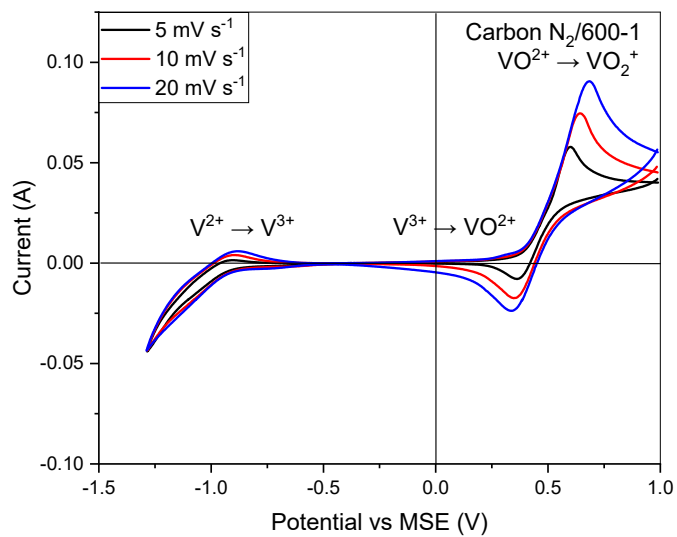

b)

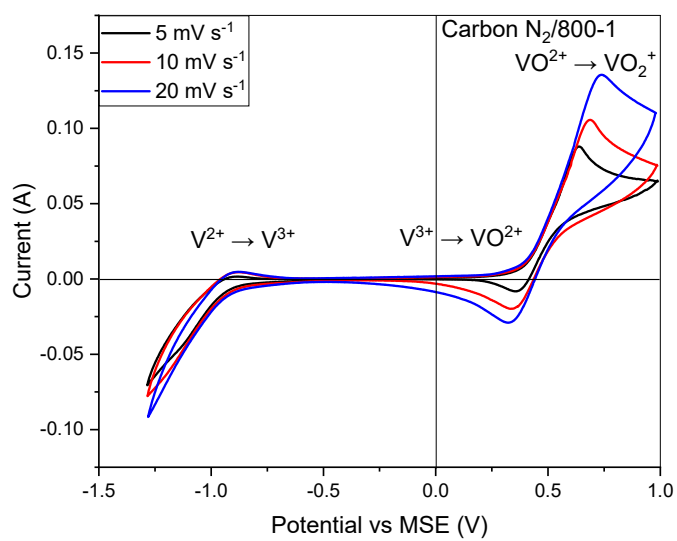

c)

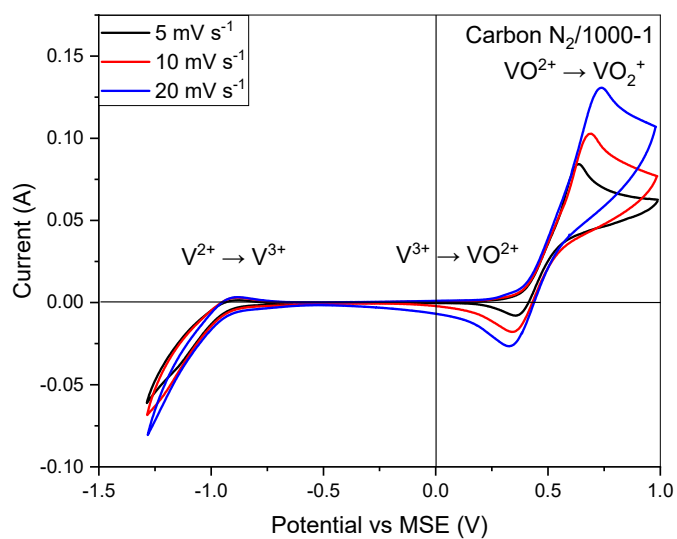

d)

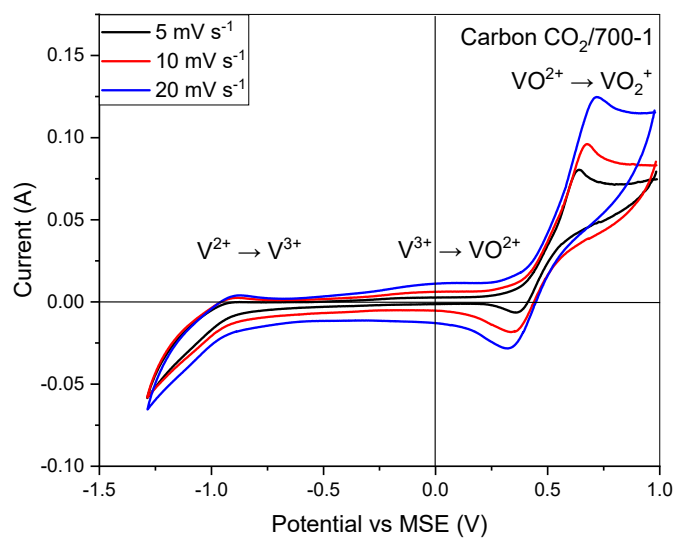

e)

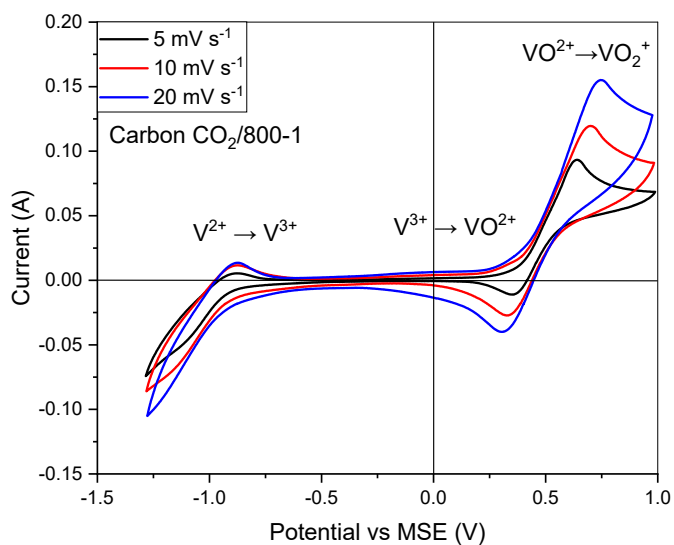

f)

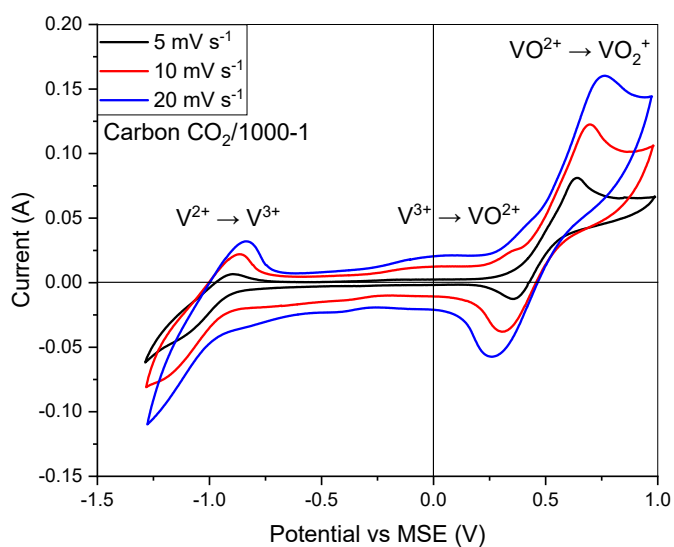

Figure S18 Comparison of cyclic voltammograms for vanadium redox reactions with carbon/PVDF composite electrodes made from carbons prepared in nitrogen and carbon dioxide atmospheres for sweep rates of 5, 10, and 20 mV s<sup>-1</sup> a) Carbon N<sub>2</sub>/600-1, b) Carbon N<sub>2</sub>/800-1, c) Carbon N<sub>2</sub>/1000-1, d) Carbon CO<sub>2</sub>/700-1, e) Carbon CO<sub>2</sub>/800-1, f) Carbon CO<sub>2</sub>/1000-1

### 2.1.4 Comparison of Cyclic Voltammograms (Sweep Rate 20 mV s<sup>-1</sup>) for Electrodes made from Carbons prepared under Nitrogen and Carbon Dioxide Atmospheres with corresponding Functionalized Carbons

a)

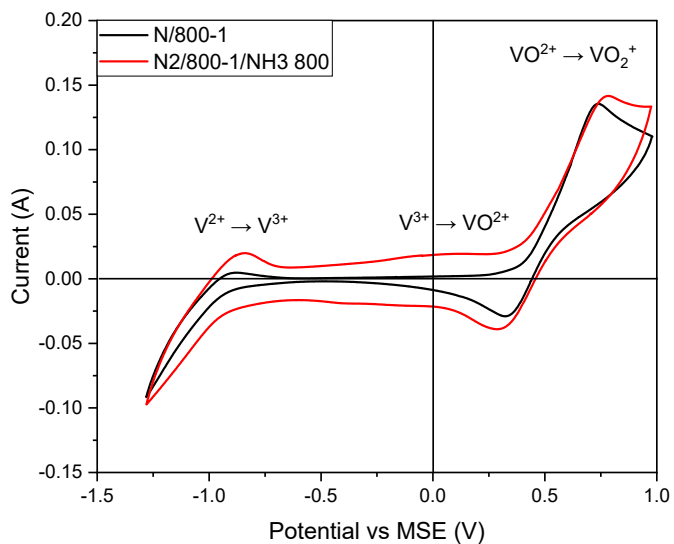

b)

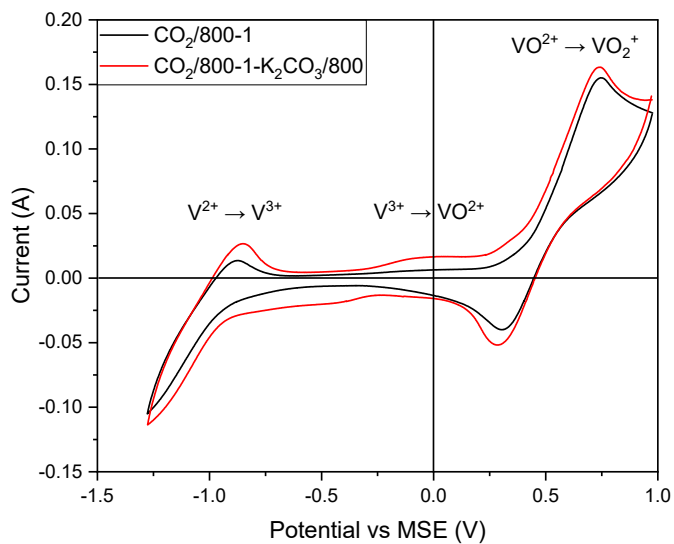

c)

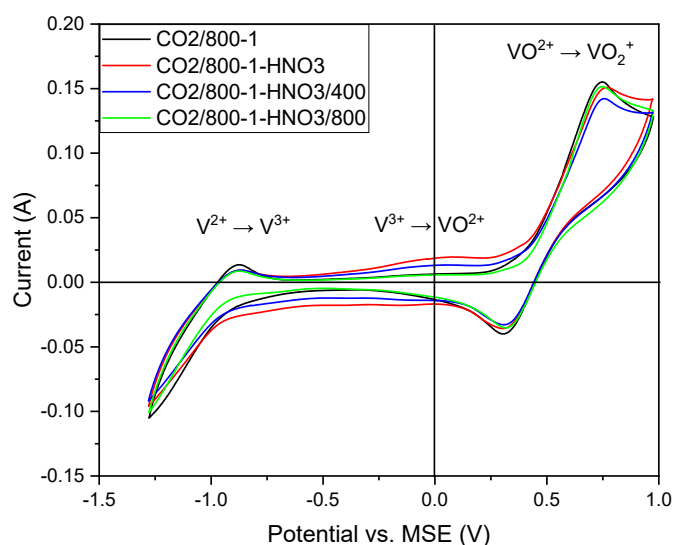

Figure S19. Comparison of cyclic voltammograms (Sweep Rate 20 mV s<sup>-1</sup>) for vanadium redox reactions with carbon/PVDF composite electrodes made from functionalized carbons a) Carbons N<sub>2</sub>/800-1 and N<sub>2</sub>/800-1-NH<sub>3</sub>/800; b) Carbons CO<sub>2</sub>/800-1 and CO<sub>2</sub>/800-1-K<sub>2</sub>CO<sub>3</sub> and c) Carbons CO<sub>2</sub>/800-1, CO<sub>2</sub>/800-1-HNO<sub>3</sub>, CO<sub>2</sub>/800-1-HNO<sub>3</sub>/400 and CO<sub>2</sub>/800-1-HNO<sub>3</sub>/800

## 2.2 Modeling of Electrical Impedance Spectra

EIS measurements probe the distribution of process timescales that the electrodes exhibit as the frequency of the probe signal in the range of 0.1 MHz to 100 kHz. The physical effects that may be observed include capacitance effects due to films, diffusion in bulk electrolytes, and the electrode structure, for example, porous structure, and distribution of timescales within heterogeneous samples. Many of the timescales are associated with specific length scales related to the thickness of electrode films, faradaic reactions at interfaces, diffusion over characteristic distances, etc.

The range of different carbons used to fabricate the electrodes suggests that modeling the EIS characteristics with a simple model is not anticipated. The model (see Figure S20a) used was applicable to all the samples investigated, but some components were not necessary for some electrodes (See Figure S20).



a)

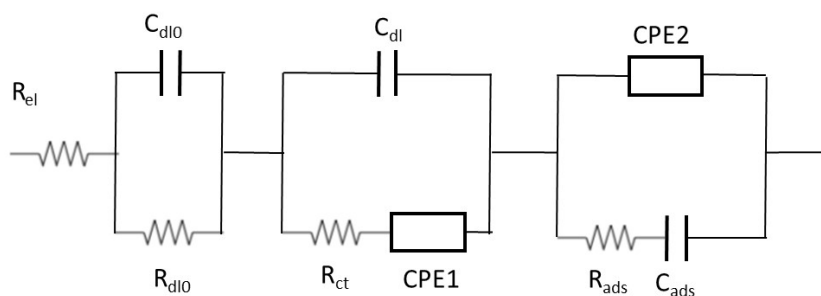

b)

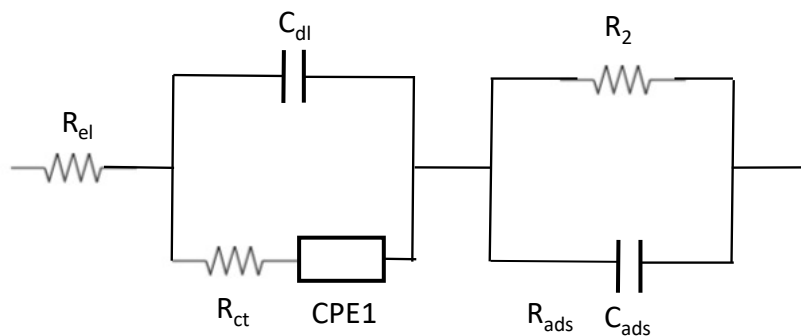

Figure S20. Electrical circuit models for electric impedance spectroscopy a) Full model b) Simplified model.

$C_{dl0}$ ,  $R_{dl0}$ , and  $R_{dl}$  are the resistances and capacitance of the double layer.  $R_{ads}$  and  $C_{ads}$  are adsorption resistance and capacitance, respectively.  $R_{ct}$  is the charge transfer resistance. CPE1 and CPE2 are constant phase elements, which have Warburg impedances of the form:

$$Z = \frac{Y_{inv}}{(j\omega)^\varphi} \quad (S1)$$

The angular frequency is  $\omega$ , and  $j$  is  $\sqrt{-1}$ . When the exponent  $\varphi$  approaches 1, the impedance  $Z$  becomes a capacitance with  $Y_{inv}$  equal to the inverse of the capacitance, whereas when  $\varphi$  approaches zero, it becomes a resistor with  $Y_{inv}$  equal to the resistance. The parameters are given in Supporting Information Table S1. However, in some cases, not all the parameters were required to reproduce the EIS graph (Table S1).

The carbon samples oxidized with  $\text{HNO}_3$  and thermally treated gave low  $|\text{Im}Z|$  values, and the capacitance behavior of the samples was different from the other samples in the series. The only fit obtained for the samples involved taking the complex conjugate of the normal expression for  $Z$  given above.

$$Z = Y_{inv} 2 ((i\omega)^{-\varphi}) \quad (S2)$$

$$= \frac{Y_{inv} 2}{\omega^\varphi} \left( \exp\left(\frac{-i\pi\varphi}{2}\right) \right) \quad (S3)$$

$$= \frac{Y_{inv} 2}{\omega^\varphi} \left( \cos\left(\frac{\pi\varphi}{2}\right) - i \sin\left(\frac{\pi\varphi}{2}\right) \right) \quad (S4)$$

The imaginary part of this equation is negative. However, where a negative capacitance might be expected, it is usually where more complex chemical reactions or adsorption effects are observed. It is possible for the imaginary part of the expression above to become positive, allowing the capacitance component to become negative. In this case, the equation for impedance is below.

$$Z = \frac{Y_{inv} 2}{\omega^\varphi} \left( \exp\left(\frac{i\pi\varphi}{2}\right) \right) \quad (S5)$$

This expression for the impedance of  $Y_{inv} 2$  in the circuit above allowed the  $\text{CO}_2/800\text{-1-HNO}_3$  and  $\text{CO}_2/800\text{-1-HNO}_3/400$  samples to be fitted; no other circuit was found to fit these data.

In the case of the electrode made from the NH<sub>3</sub> treated carbon (N<sub>2</sub>/800-1-NH<sub>3</sub>/800), a simplified model based on the above model provided a satisfactory description of the electrical impedance characteristics (See Figure 12b). The low frequency circuit is replaced by a simple parallel resistance/capacitance in which  $R_{ads}$  and  $\phi 2$  in the circuit above are zero. CPE2 reverts to a resistor ( $R_2$ ) rather than  $Y_{inv2}$ .

In (R,C) circuits, the physical significance of the capacitance is not reflected directly in either the height or width of a feature; the response is represented by a semicircle whose diameter is equal to the value of  $R$  and whose height is  $R/2$ . The capacitance reflects the frequency at which the maximum in the semicircle is observed. At this maximum  $\omega_{max}CR = 1$ , particularly for lower frequency structures, there is often a relationship between  $\omega_{max}$  and some characteristic distance  $\delta$ . The relationship is of the form

$$\delta^2 = D/\omega_{max}^2 \quad (S6)$$

where  $D$  is the diffusion coefficient. Given the values of  $R_2$  and  $C_{ads}$ ,  $\omega_{max} = 11:8$ , and assuming that the diffusion coefficient is approximately  $10^{-5} \text{ cm}^2 \text{ sec}^{-1}$ , a length of  $9 \mu\text{m}$  is obtained. This is possibly a pore length. The value of  $\phi 1$  is significantly lower than 0.45, which is expected for a Warburg component, reflecting the porous nature of the composite electrode.

Table S1. EIS model parameters a) Carbonization under nitrogen; b) Carbonization under carbon dioxide; c) CO<sub>2</sub>/800-1-HNO<sub>3</sub> and CO<sub>2</sub>/800-1-HNO<sub>3</sub>/400; d) NH<sub>3</sub> treated carbon N<sub>2</sub>/800-1-NH<sub>3</sub>/800 e) K<sub>2</sub>CO<sub>3</sub> treated carbon CO<sub>2</sub>/800-1-K<sub>2</sub>CO<sub>3</sub>/800

a) Carbonization under Nitrogen

| Electrode Carbon | N <sub>2</sub> /600-1            | N <sub>2</sub> /800-1            | N <sub>2</sub> /1000-1           |
|------------------|----------------------------------|----------------------------------|----------------------------------|
| Parameter        |                                  |                                  |                                  |
| $R_{el}$         | $1.021 \pm 0.006$                | $0.9359 \pm 0.0028$              | $0.9825 \pm 0.0055$              |
| $C_{dl0}$        |                                  | $9.984 \pm 0.535 \times 10^{-5}$ | $5.812 \pm 0.379 \times 10^{-5}$ |
| $R_{dl0}$        |                                  | $0.1186 \pm 0.0026$              | $0.1858 \pm 0.0056$              |
| $R_{ct}$         | $0.2729 \pm 0.0051$              | $0.0749 \pm 0.0023$              |                                  |
| $C_{dl}$         | $3.282 \pm 0.136 \times 10^{-5}$ | $1.438 \pm 0.007 \times 10^{-3}$ | $4.050 \pm 0.324 \times 10^{-4}$ |
| $\phi 1$         | $0.2649 \pm 0.0023$              | $0.3105 \pm 0.0031$              | $0.1793 \pm 0.0015$              |
| $Y_{inv1}$       | $0.9352 \pm 0.0071$              | $0.5751 \pm 0.0043$              | $1.031 \pm 0.0085$               |
| $R_{ads}$        |                                  |                                  |                                  |
| $C_{ads}$        | $0.4972 \pm 0.0397$              | $0.3344 \pm 0.0399$              | $0.5276 \pm 0.0278$              |
| $\phi 2$         |                                  |                                  |                                  |
| $Y_{inv2}$       | $0.08759 \pm 0.00442$            | $0.02911 \pm 0.00265$            | $0.9332 \pm 0.00346$             |

b) Carbonization under Carbon dioxide

| Electrode Carbon  | CO <sub>2</sub> /700-1           | CO <sub>2</sub> /800-1           | CO <sub>2</sub> /1000-1         |
|-------------------|----------------------------------|----------------------------------|---------------------------------|
| <b>Parameter</b>  |                                  |                                  |                                 |
| R <sub>el</sub>   | 7.992 ± 0.073 x 10 <sup>-1</sup> | 5.767 ± 0.014 x 10 <sup>-1</sup> | 8.661 ± 0.038 x10 <sup>-1</sup> |
| C <sub>dlo</sub>  |                                  | 1.951 ± 0.084 x10 <sup>-4</sup>  | 1.697 ± 0.184 x10 <sup>-4</sup> |
| R <sub>dlo</sub>  |                                  | 7.271 ± 0.128 x10 <sup>-2</sup>  | 7.962 ± 0.352x10 <sup>-2</sup>  |
| R <sub>ct</sub>   | 1.603 ± 0.033 x10 <sup>-1</sup>  | 4.683 ± 0.115 x 10 <sup>-2</sup> | 4.276 ± 0.284 x10 <sup>-2</sup> |
| C <sub>dl</sub>   | 6.268 ± 0.266 x10 <sup>-5</sup>  | 4.644 ± 0.257 x 10 <sup>-3</sup> | 4.018 ± 0.536 x10 <sup>-3</sup> |
| φ <sub>1</sub>    | 8.111 ± 0.718 x 10 <sup>-1</sup> | 8.448 ± 0.598 x10 <sup>-1</sup>  | 3.778 ± 0.060 x10 <sup>-1</sup> |
| Y <sub>inv1</sub> | 7.348 ± 1.412 x 10 <sup>-2</sup> | 4.558 ± 0.718 x 10 <sup>-2</sup> | 4.103 ± 0.047x10 <sup>-1</sup>  |
| R <sub>ads</sub>  | 1.982 ± 0.106                    | Constrained to zero              |                                 |
| C <sub>ads</sub>  | 3.761 ± 0.254 x 10 <sup>-3</sup> | 4.714 ± 0.223 x 10 <sup>-2</sup> | 1.510 ± 0.13 x10 <sup>-1</sup>  |
| φ <sub>2</sub>    | 1.859 ± 0.070 x 10 <sup>-1</sup> | 2.586 ± 0.052 x10 <sup>-1</sup>  |                                 |
| Y <sub>inv2</sub> | 8.537 ± 0.080 x 10 <sup>-1</sup> | 3.528 ± 0.082 x 10 <sup>-1</sup> | 6.308 ± 0.365x10 <sup>-2</sup>  |

c) HNO<sub>3</sub> treated CO<sub>2</sub>/800-1 series.

| Electrode Carbon  | CO <sub>2</sub> /800-1-HNO <sub>3</sub> | CO <sub>2</sub> /800-1-HNO <sub>3</sub> /400 |
|-------------------|-----------------------------------------|----------------------------------------------|
| Parameter         |                                         |                                              |
| R <sub>el</sub>   | 5.469 ± 0.043 x 10 <sup>-1</sup>        | 6.047 ± 0.045 x10 <sup>-1</sup>              |
| C <sub>dlo</sub>  | 2.476 ± 0.21 x 10 <sup>-4</sup>         | 1.840 ± 0.248x10 <sup>-4</sup>               |
| R <sub>dlo</sub>  | 5.305 ± 0.225 x 10 <sup>-2</sup>        | 6.443 ± 0.389x10 <sup>-2</sup>               |
| R <sub>ct</sub>   | 2.136 ± 0.209 x 10 <sup>-2</sup>        | 1.492 ± 0.339 x10 <sup>-2</sup>              |
| C <sub>dl</sub>   | 2.848 ± 0.471 x 10 <sup>-3</sup>        | 3.035 ± 0.956 x10 <sup>-3</sup>              |
| φ <sub>1</sub>    | 3.175 ± 0.057 x 10 <sup>-3</sup>        | 3.364 ± 0.069 x10 <sup>-1</sup>              |
| Y <sub>inv1</sub> | 3.044 ± 0.040 x 10 <sup>-1</sup>        | 4.519 ± 0.061x10 <sup>-1</sup>               |
| R <sub>ads</sub>  | 1.534 ± 0.183 x 10 <sup>-1</sup>        | 2.298 ± 0.396x10 <sup>-1</sup>               |
| C <sub>ads</sub>  | 6.998 ± 0.697 x 10 <sup>-2</sup>        | 3.731 ± 0.668x10 <sup>-2</sup>               |
| φ <sub>2</sub>    | 1.025 ± 0.056 x10 <sup>-1</sup>         | 2.413 ± 0.064x10 <sup>-1</sup>               |
| Y <sub>inv2</sub> | 1.337 ± 0.048 x 10 <sup>-1</sup>        | 2.247 ± 050x 10 <sup>-1</sup>                |

**Note: The complex conjugate was used to calculate Y<sub>inv2</sub>.**

d) NH<sub>3</sub> treated N<sub>2</sub>/800-1 at 800°C

| Electrode Carbon  | N <sub>2</sub> /800-1-NH <sub>3</sub> /800 |
|-------------------|--------------------------------------------|
| Parameter         |                                            |
| R <sub>el</sub>   | 1.123 ± 0.003                              |
| R <sub>ct</sub>   | 8.892 ± 0.28 x 10 <sup>-3</sup>            |
| C <sub>dl</sub>   | 1.057 ± 0.071 x 10 <sup>-4</sup>           |
| φ <sub>1</sub>    | 3.134 ± 0.022 x 10 <sup>-1</sup>           |
| Y <sub>inv1</sub> | 5.719 ± 0.038 x 10 <sup>-1</sup>           |
| R <sub>2</sub>    | 4.913 ± 0.278 x 10 <sup>-2</sup>           |
| C <sub>ads</sub>  | 1.726 ± 0.149                              |

e) K<sub>2</sub>CO<sub>3</sub> treated Carbon CO<sub>2</sub>/800-1-K<sub>2</sub>CO<sub>3</sub>/800

| Electrode Carbon | CO <sub>2</sub> /800-1-K <sub>2</sub> CO <sub>3</sub> /800 |
|------------------|------------------------------------------------------------|
| Parameter        |                                                            |
| Rel              | 5.986 ± 0.016x10 <sup>-1</sup>                             |
| Cdl0             | 7.657 ± 0.351x10 <sup>-5</sup>                             |
| Rdl0             | 8.477 ± 0.209x10 <sup>-2</sup>                             |
| Rct              | 1.518 ± 0.192x10 <sup>-2</sup>                             |
| Cdl              | 2.227 ± 0.421x10 <sup>-3</sup>                             |
| φ1               | 3.425 ± 0.040x10 <sup>-1</sup>                             |
| Yinv1            | 4.466 ± 0.041x10 <sup>-1</sup>                             |
| Rads             |                                                            |
| Cads             | 5.852 ± 0.563x10 <sup>-1</sup>                             |
| φ2               |                                                            |
| Yinv2            | 3.253 ± 0.260 x10 <sup>-2</sup>                            |

Note: The additional (Rdl0, Cdl0) circuit was needed to get a good fit for the high-frequency data.

### 2.3 Cell Performance Repeatability Measurements

#### Cell Construction Details

The order of assembly from outside to inside (for 1 side):

Cell frame – Insulator – Current collector – Bipolar plate – Felt holder and carbon felt.

Table S2 Cell Performance and repeatability studies

a) Cell parameters

| Component                                          | Mass (g)   | Percentage (wt%) | Dimensions                                |
|----------------------------------------------------|------------|------------------|-------------------------------------------|
| Cell frame                                         | 260.712    | 62.36            |                                           |
| Bolts                                              | 36.5398    | 8.74             |                                           |
| Insulator                                          | 24.58      | 5.88             |                                           |
| Current collector                                  | 81.24      | 19.43            |                                           |
| Bipolar plate,                                     | 1.89       | 0.45             | Active area<br>2 x 2 cm <sup>2</sup>      |
| PAN Felt holder/<br>case                           | 7.368      | 1.76             |                                           |
| Carbon felt                                        | 0.3312     | 0.08             | 2 x 2 cm <sup>2</sup><br>Thickness 4.6 mm |
| Electrolyte                                        | 5.4 (4 mL) | 1.29             |                                           |
| Carbon material<br>and PVDF on<br>bipolar plate    | 0.024      | 0.01             |                                           |
| Fumatech Fap-<br>450 Anion<br>Exchange<br>membrane |            |                  |                                           |

**Data for both sides**

Table S3a. Repeatability studies for average overall, coulombic, and voltage efficiencies for various carbons in cell performance cycle measurements a) average values for various current densities and b) individual cycle measurements

| Carbon<br>Current<br>Density<br>mA cm <sup>-2</sup> | N <sub>2</sub> /800-1       |            | N <sub>2</sub> /800-1-NH <sub>3</sub> /800 |            | CO <sub>2</sub> /800-1-HNO <sub>3</sub> |            |
|-----------------------------------------------------|-----------------------------|------------|--------------------------------------------|------------|-----------------------------------------|------------|
|                                                     | Efficiency<br>%             | Error<br>% | Efficiency<br>%                            | Error<br>% | Efficiency<br>%                         | Error<br>% |
|                                                     | <b>Overall efficiency</b>   |            |                                            |            |                                         |            |
| 10                                                  | 90.48                       | 0.12       | 90.23                                      | 0.93       | 89.60                                   | 0.46       |
| 15                                                  | 90.90                       | 0.09       | 90.17                                      | 0.99       | 89.47                                   | 0.33       |
| 20                                                  | 90.10                       | 0.13       | 88.98                                      | 1.17       | 88.43                                   | 0.26       |
|                                                     | <b>Coulombic Efficiency</b> |            |                                            |            |                                         |            |
| 10                                                  | 94.18                       | 0.16       | 94.42                                      | 0.66       | 93.99                                   | 0.50       |
| 15                                                  | 96.51                       | 0.21       | 96.41                                      | 0.42       | 95.96                                   | 0.35       |
| 20                                                  | 97.61                       | 0.12       | 97.35                                      | 0.37       | 97.06                                   | 0.26       |
|                                                     | <b>Voltage Efficiency</b>   |            |                                            |            |                                         |            |
| 10                                                  | 96.07                       | 0.10       | 95.56                                      | 0.55       | 95.33                                   | 0.03       |
| 15                                                  | 94.18                       | 0.21       | 93.52                                      | 0.69       | 93.23                                   | 0.04       |
| 20                                                  | 92.31                       | 0.22       | 91.40                                      | 0.91       | 91.11                                   | 0.03       |



Table S3b. Repeatability studies for overall efficiencies for various current densities in cell performance cycle measurements for various carbons.

| Carbon sample<br>Runs<br>Cycle<br>number | Current<br>Density<br>mA cm <sup>-2</sup> | N <sub>2</sub> /800-1 |            | N <sub>2</sub> /800-1-NH <sub>3</sub> /800 |            | CO <sub>2</sub> /800-1-HNO <sub>3</sub> |            |
|------------------------------------------|-------------------------------------------|-----------------------|------------|--------------------------------------------|------------|-----------------------------------------|------------|
|                                          |                                           | Efficiency<br>%       | Error<br>% | Efficiency<br>%                            | Error<br>% | Efficiency<br>%                         | Error<br>% |
| 1                                        | 10                                        | 89.31                 | 0.05       | 89.63                                      | 0.63       | 88.94                                   | 1.26       |
| 2                                        | 10                                        | 90.34                 | 0.13       | 90.11                                      | 0.59       | 90.02                                   | 0.59       |
| 3                                        | 10                                        | 90.43                 | 0.04       | 90.33                                      | 0.64       | 89.58                                   | 0.56       |
| 4                                        | 10                                        | 90.55                 | 0.02       | 90.28                                      | 0.59       | 89.51                                   | 0.60       |
| 5                                        | 10                                        | 90.59                 | 0.00       | 90.22                                      | 0.59       | 89.51                                   | 0.60       |
| 6                                        | 15                                        | 90.38                 | 0.28       | 89.95                                      | 0.77       | 89.17                                   | 0.62       |
| 7                                        | 15                                        | 90.85                 | 0.13       | 90.16                                      | 0.75       | 89.49                                   | 0.44       |
| 8                                        | 15                                        | 90.84                 | 0.09       | 90.20                                      | 0.74       | 89.42                                   | 0.50       |
| 9                                        | 15                                        | 90.91                 | 0.05       | 90.19                                      | 0.76       | 89.48                                   | 0.41       |
| 10                                       | 15                                        | 90.98                 | 0.02       | 90.12                                      | 0.75       | 89.47                                   | 0.41       |
| 11                                       | 20                                        | 89.75                 | 0.23       | 88.86                                      | 0.93       | 88.20                                   | 0.38       |
| 12                                       | 20                                        | 90.09                 | 0.16       | 89.13                                      | 0.95       | 88.45                                   | 0.33       |
| 13                                       | 20                                        | 90.13                 | 0.20       | 89.11                                      | 0.93       | 88.43                                   | 0.40       |
| 14                                       | 20                                        | 90.12                 | 0.08       | 88.91                                      | 1.11       | 88.44                                   | 0.31       |
| 15                                       | 20                                        | 90.06                 | 0.19       | 88.76                                      | 0.92       | 88.39                                   | 0.32       |

Figure S21 Cell Performance characteristics a) Repeatability of charge -Discharge data for carbon N<sub>2</sub>/800-1-NH<sub>3</sub>/800 as a function of number b) Charge-Discharge data for the four carbons used in the study

### 3. X-ray Photoelectron Spectroscopy

#### 3.1 Repeatability studies

a)

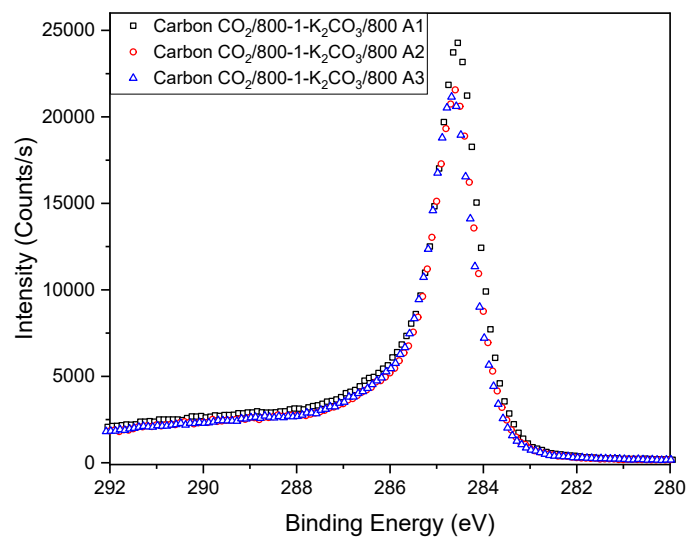

b)

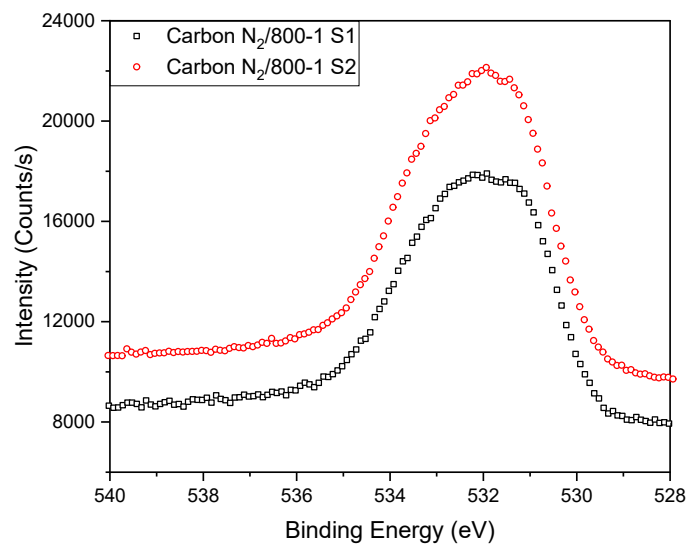

c)

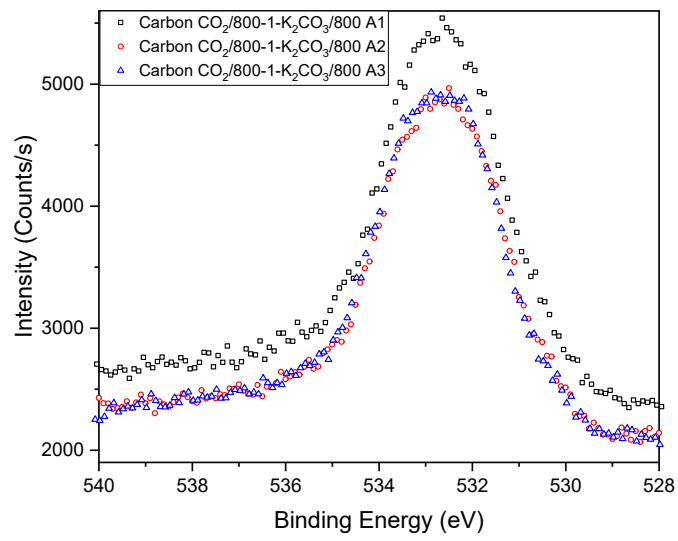

d)

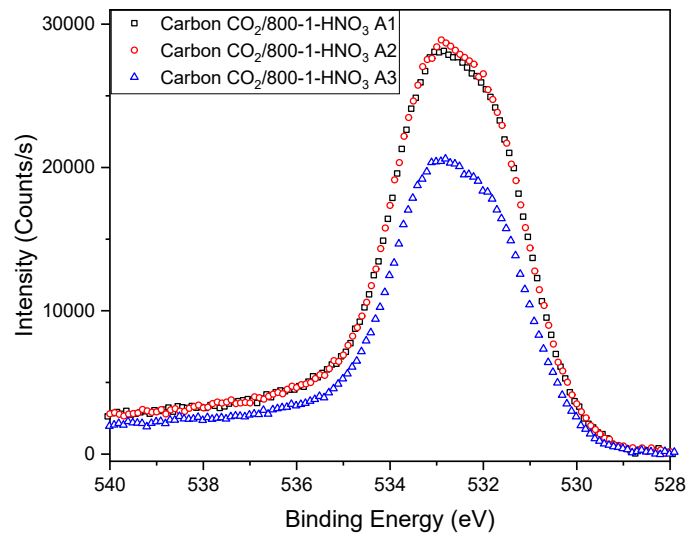

e)

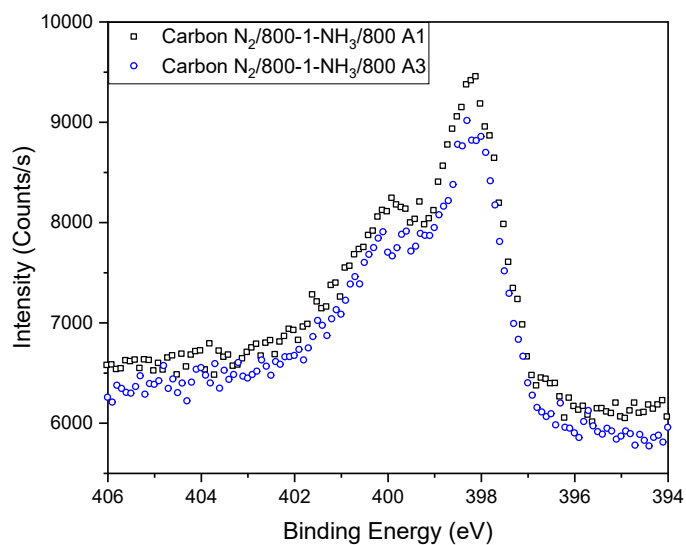

f)

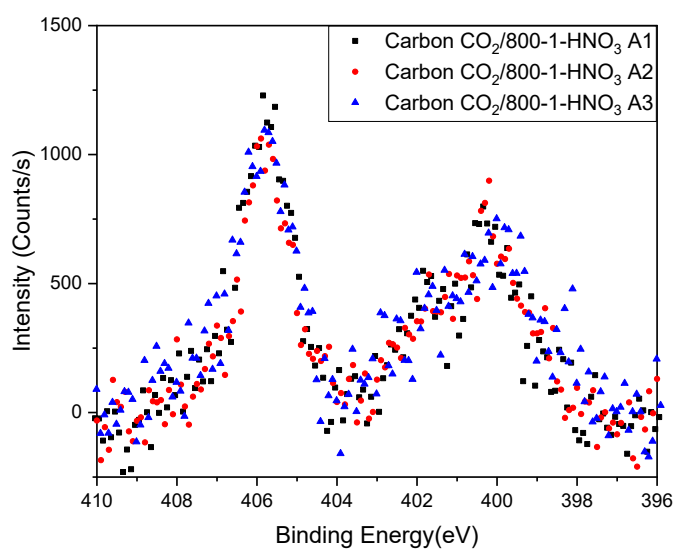

Figure S21. Repeatability comparisons for XPS spectra for the following samples a) C 1s Carbon CO<sub>2</sub>/800-1-K<sub>2</sub>CO<sub>3</sub>/800, b) O 1s Carbon N<sub>2</sub>/800-1, c) O 1s Carbon CO<sub>2</sub>/800-1-K<sub>2</sub>CO<sub>3</sub>/800, d) O 1s Carbon CO<sub>2</sub>/800-1-HNO<sub>3</sub>, e) N 1s Carbon N<sub>2</sub>/800-1-NH<sub>3</sub>/800 and f) N 1s Carbon CO<sub>2</sub>/800-1-HNO<sub>3</sub>

### 3.2 Comparison of X-ray Photoelectron O 1s Spectra for various Hold Times

a)

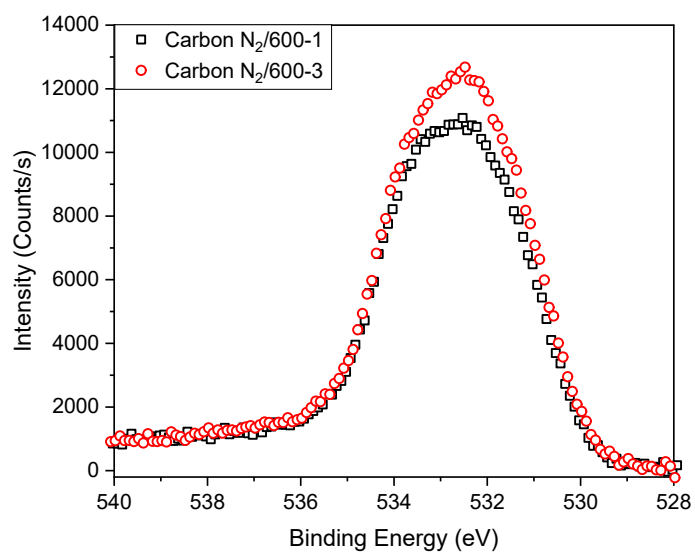

b)

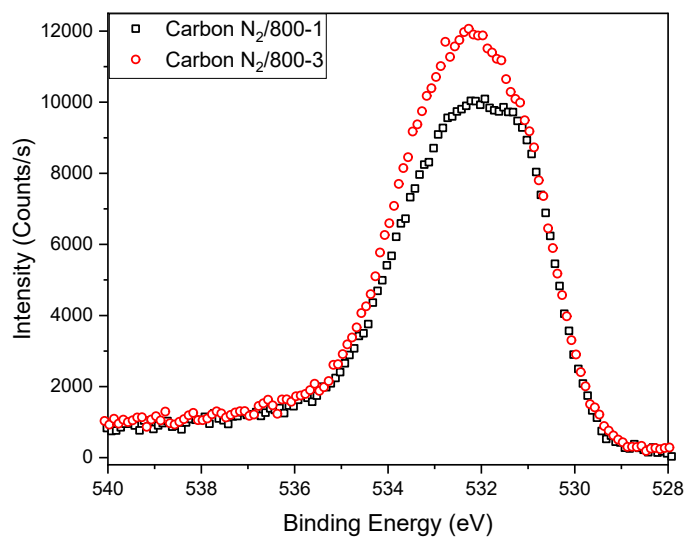

c)

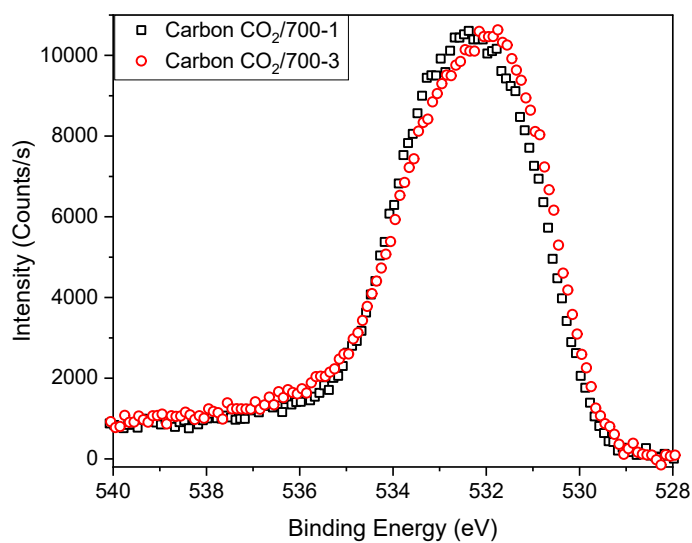

d)

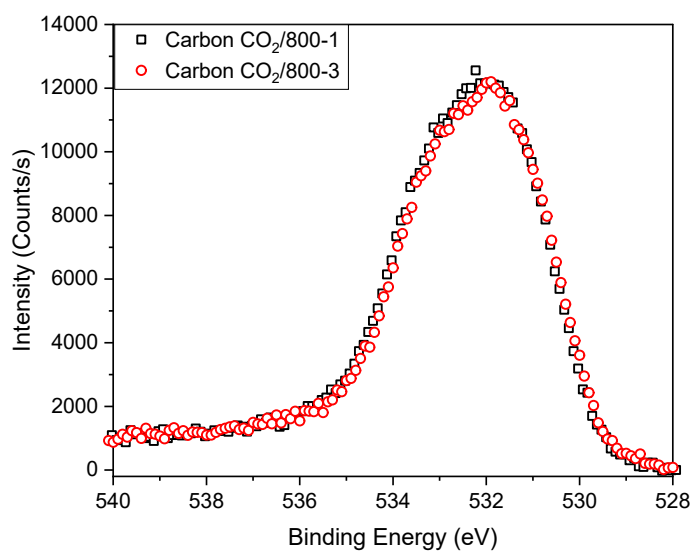

Figure S22. Comparison of XPS O1s spectra for samples with various hold times a) Carbons N<sub>2</sub>/600-1 and N<sub>2</sub>/600-3, b) Carbons N<sub>2</sub>/800-1 and N<sub>2</sub>/800-3, c) Carbons CO<sub>2</sub>/700-1 and CO<sub>2</sub>/700-3, and d) Carbons CO<sub>2</sub>/800-1 and CO<sub>2</sub>/800-3. Spectra have been amended by background subtraction using average intensity at 525 - 525.5 eV in order to compare peak shapes.

### 3.3 Comparison of X-ray Photoelectron O 1s Spectra for Series 1 (N<sub>2</sub> Atmosphere) and Series 2 (CO<sub>2</sub> Atmosphere) as a function of Heat Treatment Temperature

a)

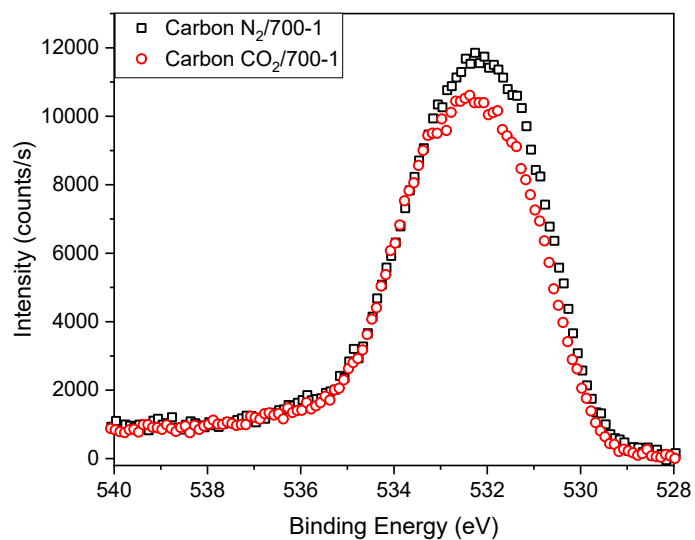

b)

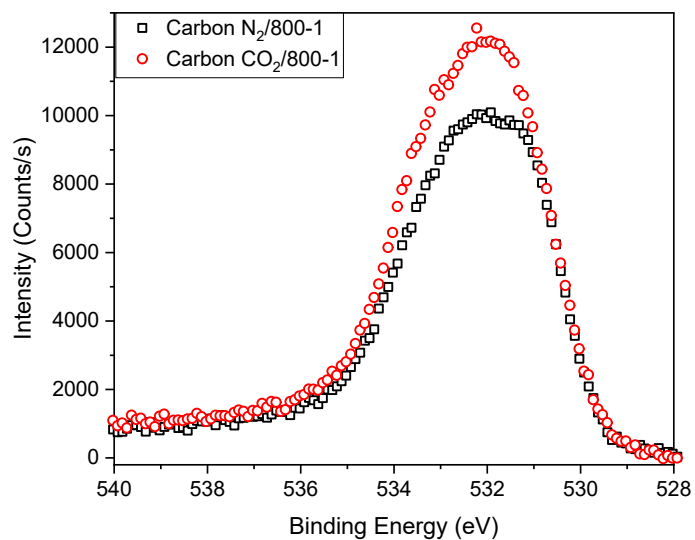

c)

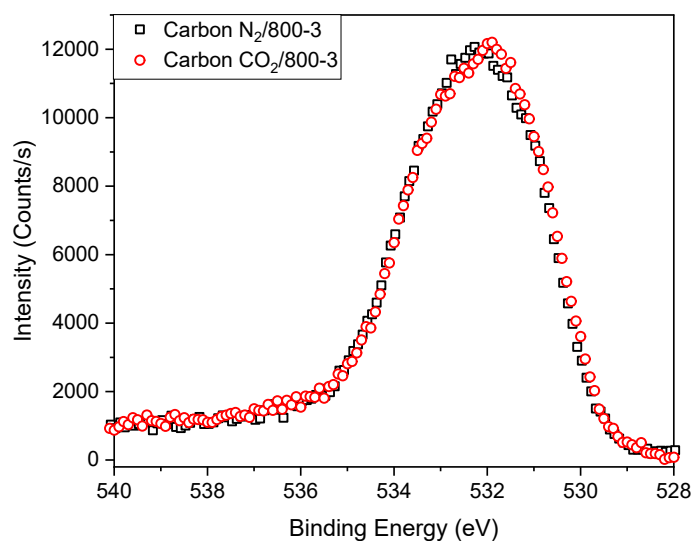

d)

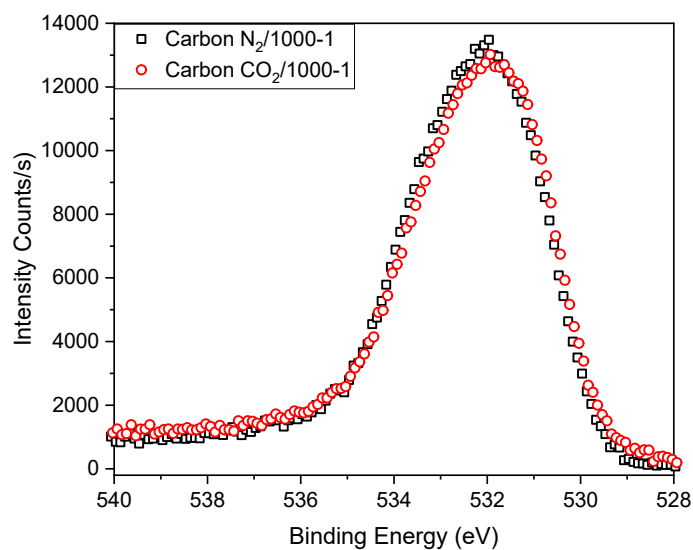

Figure S23. Comparison of X-ray Photoelectron O1s Spectra for Series1 ( $N_2$  Atmosphere) and Series 2 ( $CO_2$  Atmosphere) as a function of Heat Treatment Temperature a) Carbons  $N_2/700-1$  and  $CO_2/700-1$ , b) Carbons  $N_2/800-1$  and  $CO_2/800-1$ , c) Carbons  $N_2/800-3$  and  $CO_2/800-3$ , and d) Carbons  $N_2/1000-1$  and  $CO_2/1000-1$ , Spectra have been amended by background subtraction using average intensity at 525 - 525.5 eV in order to compare peak shapes.



### 3.4 Comparison of X-ray Photoelectron Spectra for Various Treatment Methods with Original Materials

a)

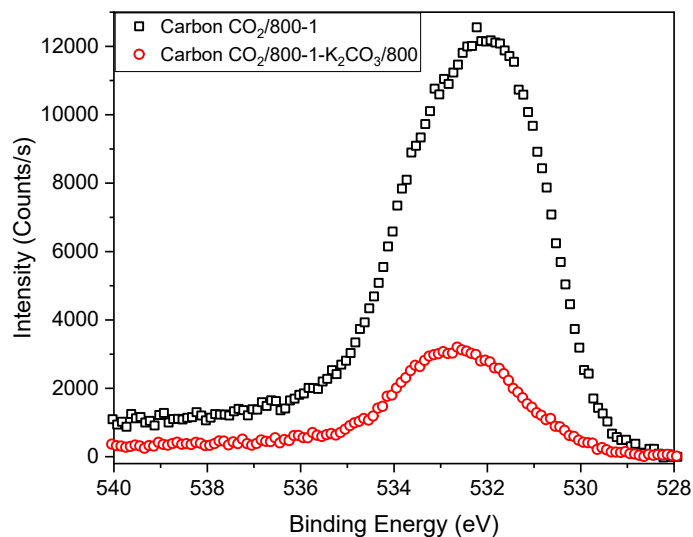

b)

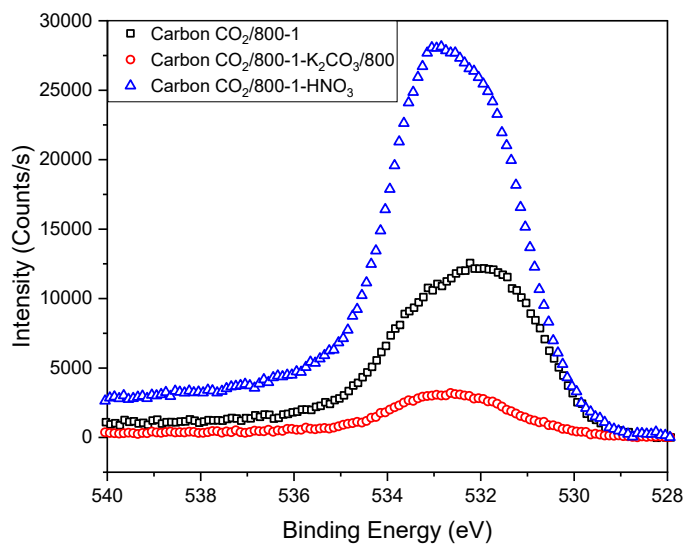

v

Figure S24. Comparison of X-ray Photoelectron O 1s Spectra for a) Carbons CO<sub>2</sub>/800-1 and CO<sub>2</sub>/800-1-K<sub>2</sub>CO<sub>3</sub>/800 and b) Carbons CO<sub>2</sub>/800-1, CO<sub>2</sub>/800-1-K<sub>2</sub>CO<sub>3</sub>/800 and CO<sub>2</sub>/800-1-HNO<sub>3</sub>. Spectra have been displayed after subtraction of the background, which was taken as the average intensity at 525 - 525.5 eV to compare peak shapes.

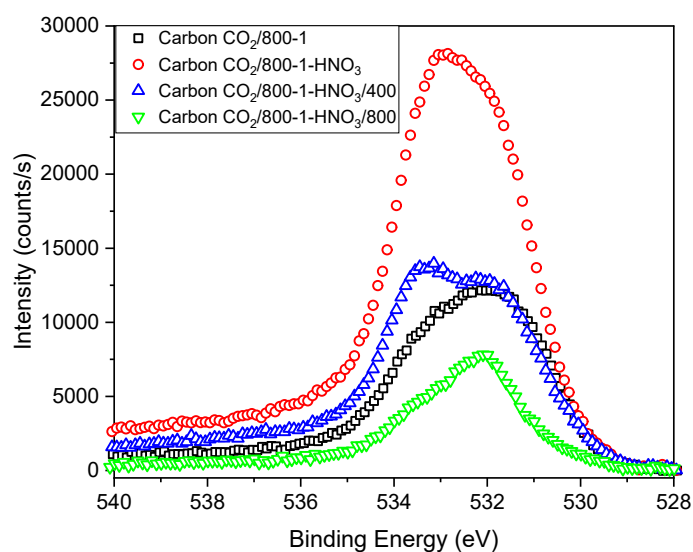

Figure S25. Comparison of X-ray Photoelectron O 1s Spectra for the HNO<sub>3</sub> oxidized and Heat-Treated Series of Carbons CO<sub>2</sub>/800-1, CO<sub>2</sub>/800-1-HNO<sub>3</sub>, CO<sub>2</sub>/800-1-HNO<sub>3</sub>/400 and CO<sub>2</sub>/800-1-HNO<sub>3</sub>/800. Spectra have been amended by background subtraction using average intensity at 525 - 525.5 eV to allow comparison of peak shapes.

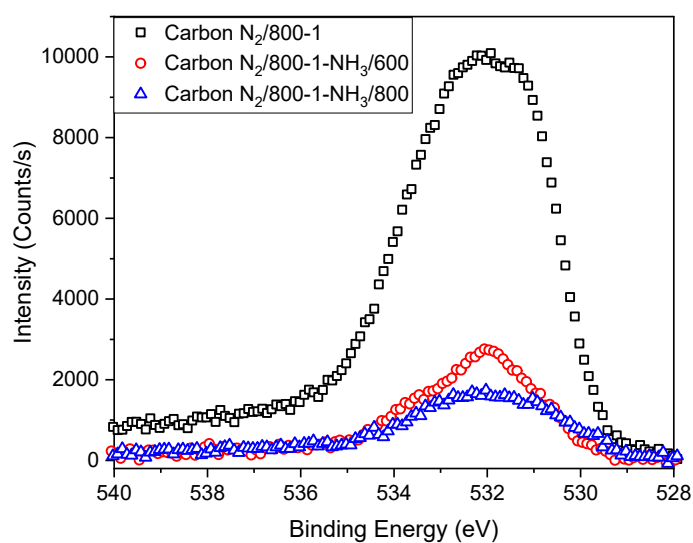

Figure S26. Comparison of X-ray Photoelectron O 1s Spectra for NH<sub>3</sub> Treated series Carbons N<sub>2</sub>/800-1, N<sub>2</sub>/800-1-NH<sub>3</sub>/600 and N<sub>2</sub>/800-1-NH<sub>3</sub>/800. Spectra have been subjected to background subtraction using average intensity at 525 - 525.5 eV to allow comparison of peak shapes.

### 3.5 XPS N 1s Spectra for Chemically Treated and Original Carbons.

a)

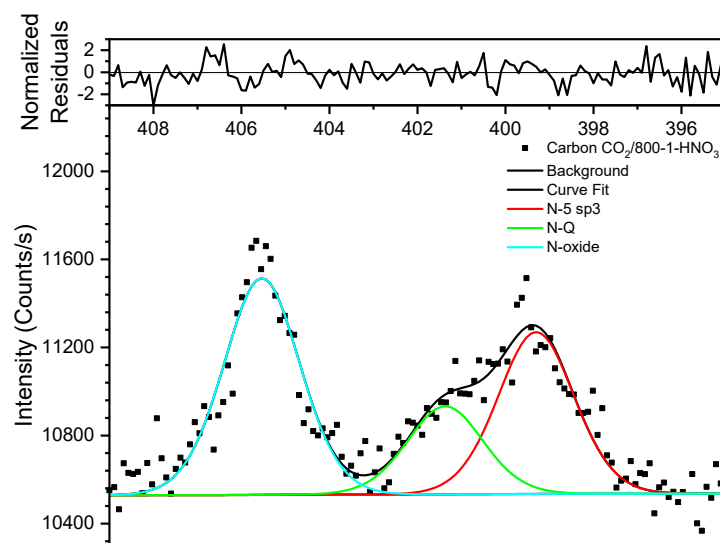

b)

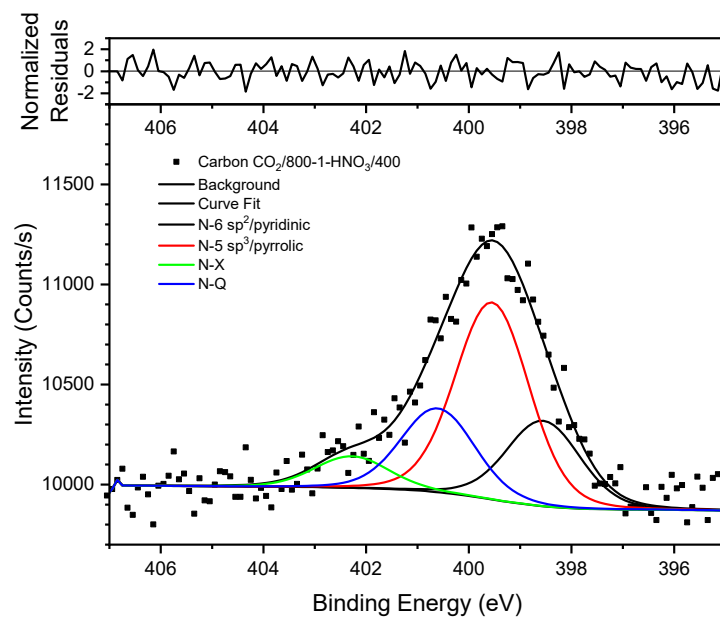

c)

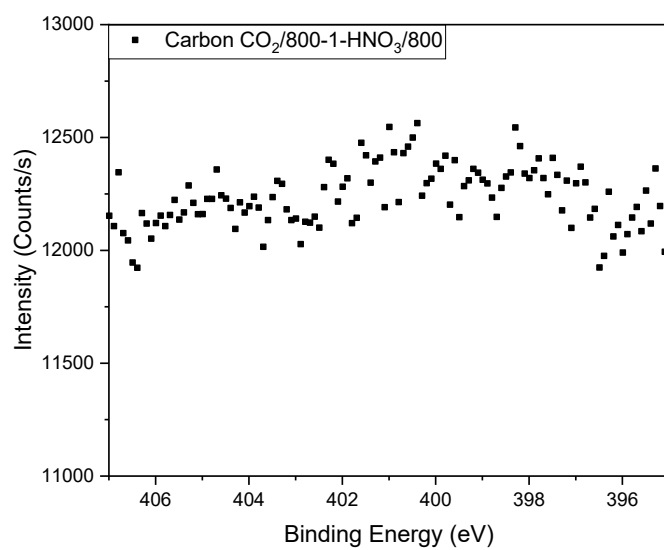

Figure S27. XPS N 1s spectra of a) Carbon CO<sub>2</sub>/800-1-HNO<sub>3</sub>, b) Carbon CO<sub>2</sub>/800-1-HNO<sub>3</sub>/400 and c) Carbon CO<sub>2</sub>/800-1-HNO<sub>3</sub>/800

a)

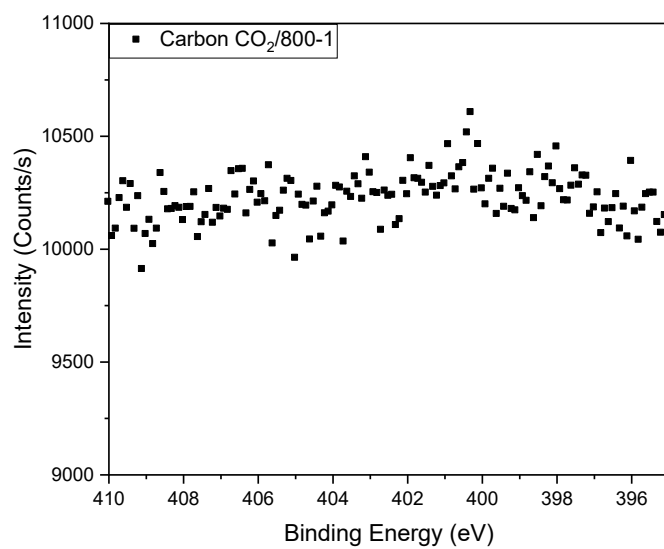

b)

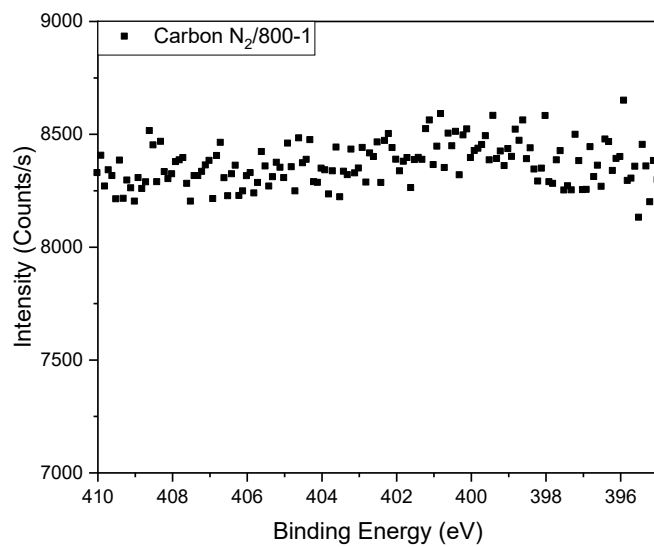

Figure S28. XPS N 1s spectra of a) Carbon CO<sub>2</sub>/800-1 and b) Carbon N<sub>2</sub>/800-1

### 3.6 Curve Resolution Data for X-ray Photoelectron Spectra

**Table S4 Repeatability Studies for Curve Fitting XPS data a) C 1s, b) O 1s, c) N 1s and d) N 1s NH<sub>3</sub> treatment**

**a)**

| C 1s spectra<br>Carbon<br>Sample                            | Distribution of Peak Areas<br>(%) |               |                 | Peak Binding Energies (eV) |               |                 | FWHM<br>(eV) | Casi $\chi^2$ |
|-------------------------------------------------------------|-----------------------------------|---------------|-----------------|----------------------------|---------------|-----------------|--------------|---------------|
|                                                             | Peak 1<br>C-O/OH                  | Peak 2<br>C=O | Peak 3<br>O-C=O | Peak 1<br>C-O/OH           | Peak 2<br>C=O | Peak 3<br>O-C=O |              |               |
| <b>N<sub>2</sub>/800-1</b>                                  |                                   |               |                 |                            |               |                 |              |               |
| S 1                                                         | 53.53                             | 30.27         | 16.20           | 286.52                     | 287.97        | 289.27          | 1.44         | 3.15          |
| S 2                                                         | 60.81                             | 28.14         | 11.05           | 286.28                     | 287.58        | 290.08          | 1.37         | 3.07          |
| Average                                                     | 57.17                             | 29.21         | 13.62           | 286.40                     | 287.78        | 289.68          | 1.41         |               |
| Standard Deviation                                          | 5.15                              | 1.50          | 3.64            | 0.17                       | 0.28          | 0.57            | 0.05         |               |
| <b>CO<sub>2</sub>/800-1-K<sub>2</sub>CO<sub>3</sub>/800</b> |                                   |               |                 |                            |               |                 |              |               |
| A 1                                                         | 57.04                             | 24.04         | 18.92           | 286.30                     | 287.90        | 289.40          | 1.61         | 2.07          |
| A 2                                                         | 56.16                             | 24.84         | 18.99           | 286.35                     | 287.90        | 289.25          | 1.38         | 2.08          |
| A 3                                                         | 54.96                             | 25.01         | 20.03           | 286.33                     | 287.68        | 289.03          | 1.23         | 2.76          |
| Average                                                     | 56.05                             | 24.63         | 19.31           | 286.32                     | 287.82        | 289.22          | 1.40         |               |
| Standard Deviation                                          | 1.05                              | 0.52          | 0.62            | 0.03                       | 0.12          | 0.18            | 0.19         |               |
| <b>CO<sub>2</sub>/800-1-HNO<sub>3</sub></b>                 |                                   |               |                 |                            |               |                 |              |               |
| A 1                                                         | 55.49                             | 0.02          | 44.49           | 286.65                     | 287.15        | 288.65          | 1.53         | 8.32          |
| A 2                                                         | 55.76                             | 0.02          | 44.22           | 286.65                     | 287.10        | 288.60          | 1.56         | 8.13          |
| A 3                                                         | 55.15                             | 0.00          | 44.85           | 286.71                     | -             | 288.61          | 1.57         | 7.11          |
| Average                                                     | 55.47                             | 0.019         | 44.52           | 286.67                     | 287.12        | 288.62          | 1.55         |               |
| Standard Deviation                                          | 0.31                              | 0.001         | 0.32            | 0.04                       | 0.03          | 0.02            | 0.02         |               |
| <b>N<sub>2</sub>/800-1-NH<sub>3</sub>/800</b>               |                                   |               |                 |                            |               |                 |              |               |
| A 1                                                         | 63.01                             | 22.326        | 14.66           | 286.28                     | 287.98        | 289.78          | 1.61         | 3.27          |
| A 2                                                         | 63.02                             | 23.294        | 13.69           | 286.21                     | 287.96        | 289.91          | 1.61         | 2.67          |
| A 3                                                         | 62.62                             | 24.426        | 12.95           | 286.16                     | 287.71        | 289.11          | 1.57         | 2.67          |
| Average                                                     | 62.88                             | 23.35         | 13.77           | 286.21                     | 287.88        | 289.60          | 1.53         |               |
| Standard Deviation                                          | 0.23                              | 1.05          | 0.86            | 0.06                       | 0.15          | 0.43            | 0.04         |               |

b)

| O 1s spectra<br>Peak 1<br>Sample                            | Distribution of Peak Areas (%) |        |        |        |        | Peak Binding Energies (eV) |        |        |        |        | FW<br>HM<br>(eV) | Casi $\chi^2$ | Abbe  |
|-------------------------------------------------------------|--------------------------------|--------|--------|--------|--------|----------------------------|--------|--------|--------|--------|------------------|---------------|-------|
|                                                             | Peak 1                         | Peak 2 | Peak 3 | Peak 4 | Peak 5 | Peak 1                     | Peak 2 | Peak 3 | Peak 4 | Peak 5 |                  |               |       |
|                                                             | C=O                            | CO/OH  | C-O    |        |        | C=O                        | C-O/OH | O-C    |        |        |                  |               |       |
| <b>N<sub>2</sub>/800-1</b>                                  |                                |        |        |        |        |                            |        |        |        |        |                  |               |       |
| S 1                                                         | 38.91                          | 35.48  | 20.40  | 3.62   | 1.59   | 531.07                     | 532.47 | 533.72 | 535.37 | 537.32 | 1.75             | 0.849         | 0.912 |
| S 2                                                         | 37.62                          | 33.16  | 24.73  | 3.35   | 1.14   | 531.04                     | 532.24 | 533.44 | 535.09 | 536.79 | 1.82             | 0.646         | 0.800 |
| Average                                                     | 38.27                          | 34.32  | 22.57  | 3.49   | 1.36   | 531.06                     | 532.36 | 533.58 | 535.23 | 537.06 | 1.79             |               |       |
| Standard Deviation                                          | 0.91                           | 1.64   | 3.06   | 0.19   | 0.32   | 0.03                       | 0.17   | 0.20   | 0.20   | 0.38   | 0.05             |               |       |
| <b>CO<sub>2</sub>/800-1-K<sub>2</sub>CO<sub>3</sub>/800</b> |                                |        |        |        |        |                            |        |        |        |        |                  |               |       |
| A 1                                                         | 11.89                          | 43.39  | 35.98  | 5.84   | 2.90   | 530.90                     | 532.20 | 533.45 | 535.80 | 538.30 | 1.96             | 0.890         | 0.934 |
| A 2                                                         | 13.68                          | 42.08  | 36.48  | 5.46   | 2.30   | 531.05                     | 532.20 | 533.50 | 535.60 | 537.65 | 1.83             | 0.855         | 0.791 |
| A 3                                                         | 9.66                           | 45.80  | 36.08  | 5.67   | 2.79   | 530.83                     | 532.23 | 533.58 | 535.73 | 537.93 | 1.87             | 0.840         | 0.850 |
| Average                                                     | 11.74                          | 43.76  | 36.18  | 5.66   | 2.66   | 530.93                     | 532.21 | 533.51 | 535.71 | 537.96 | 1.89             |               |       |
| Standard Deviation                                          | 2.01                           | 1.89   | 0.26   | 0.19   | 0.32   | 0.11                       | 0.02   | 0.07   | 0.10   | 0.32   | 0.07             |               |       |
| <b>CO<sub>2</sub>/800-1-HNO<sub>3</sub></b>                 |                                |        |        |        |        |                            |        |        |        |        |                  |               |       |
| A 1                                                         | 33.64                          | 13.48  | 46.43  | 4.68   | 1.78   | 531.55                     | 532.25 | 533.25 | 535.60 | 537.85 | 1.97             | 1.248         | 0.523 |
| A 2                                                         | 33.15                          | 13.88  | 47.26  | 4.12   | 1.58   | 531.60                     | 532.20 | 533.35 | 535.55 | 537.65 | 2.00             | 1.145         | 0.762 |
| A 3                                                         | 33.83                          | 12.60  | 47.12  | 4.60   | 1.86   | 531.56                     | 532.21 | 533.26 | 535.56 | 537.91 | 1.99             | 1.086         | 0.583 |
| Average                                                     | 33.54                          | 13.32  | 46.93  | 4.47   | 1.74   | 531.57                     | 532.22 | 533.29 | 535.57 | 537.80 | 1.99             |               |       |
| Standard Deviation                                          | 0.35                           | 0.66   | 0.45   | 0.30   | 0.14   | 0.03                       | 0.02   | 0.06   | 0.02   | 0.14   | 0.02             |               |       |

c)

| N 1s spectra<br>Carbon<br>Sample | Distribution of Peak Areas(%) |       |       | Peak Binding Energies (eV) |       |       | FWHM<br>(eV) | Casi $\chi^2$ | Abbe |
|----------------------------------|-------------------------------|-------|-------|----------------------------|-------|-------|--------------|---------------|------|
|                                  | N-sp <sup>3</sup>             | N-C-O | Nitro | N-sp <sup>3</sup>          | N-C-O | Nitro |              |               |      |

CO<sub>2</sub>/800-1-HNO<sub>3</sub>

|                    |       |       |        |        |        |        |      |       |       |
|--------------------|-------|-------|--------|--------|--------|--------|------|-------|-------|
| A 1                | 32.50 | 19.67 | 405.75 | 400.00 | 401.95 | 405.75 | 1.75 | 1.038 | 0.712 |
| A 2                | 34.70 | 18.87 | 405.80 | 400.00 | 401.90 | 405.80 | 1.89 | 0.969 | 0.788 |
| A 3                | 32.63 | 20.42 | 405.81 | 399.61 | 401.76 | 405.81 | 2.17 | 1.021 | 0.758 |
| Average            | 33.28 | 19.65 | 405.79 | 399.87 | 401.87 | 405.79 | 1.94 |       |       |
| Standard Deviation | 1.23  | 0.78  | 0.03   | 0.22   | 0.10   | 0.03   | 0.22 |       |       |



d)

| N 1s spectra<br>Carbon<br>Sample               | Distribution of Peak Areas (%) |                   |       |      |      |      | Peak Binding Energies (eV) |                   |        |        |        |        | FWHM<br>(eV) | Casi $\chi^2$ | Abbe  |
|------------------------------------------------|--------------------------------|-------------------|-------|------|------|------|----------------------------|-------------------|--------|--------|--------|--------|--------------|---------------|-------|
|                                                | N-sp <sup>2</sup>              | N-sp <sup>3</sup> | N-Q   | N-X  | N?   | NO   | N-sp <sup>2</sup>          | N-sp <sup>3</sup> | N-Q    | N-X    | N?     | NO     |              |               |       |
| N <sub>2</sub> /800-1-<br>NH <sub>3</sub> /800 |                                |                   |       |      |      |      |                            |                   |        |        |        |        |              |               |       |
| A 1                                            | 50.56                          | 26.56             | 11.47 | 4.73 | 3.75 | 2.93 | 398.18                     | 399.88            | 401.18 | 402.53 | 404.13 | 405.78 | 1.48         | 1.156         | 0.999 |
| A 2                                            | 48.52                          | 26.81             | 11.39 | 6.16 | 4.48 | 2.64 | 398.18                     | 399.96            | 401.26 | 402.96 | 404.61 | 406.26 | 1.56         | 1.346         | 0.865 |
| Average                                        | 49.54                          | 26.69             | 11.43 | 5.44 | 4.12 | 2.78 | 398.18                     | 399.92            | 401.22 | 402.74 | 404.37 | 406.02 | 1.52         |               |       |
| Standard<br>Deviation                          | 1.44                           | 0.18              | 0.06  | 1.01 | 0.52 | 0.20 | 0.01                       | 0.06              | 0.06   | 0.31   | 0.34   | 0.34   | 0.06         |               |       |

**Table S5 Curve Fitting Results for XPS data a) C 1s, b) O 1s, c) N 1s HNO<sub>3</sub> Oxidised series d) NH<sub>3</sub> treatment series**

**a)**

| C 1s spectra<br>Carbon<br>Sample                      | Distribution of Peak Areas (%) |                      |            | Peak Binding Energies (eV) |               |               | FWHM<br>(eV) | Casi $\chi^2$ |
|-------------------------------------------------------|--------------------------------|----------------------|------------|----------------------------|---------------|---------------|--------------|---------------|
|                                                       | C-O/OH                         | C=O                  | O-C=O      | C-O/OH                     | C=O           | O-C=O         |              |               |
| <b>Series 1</b>                                       |                                |                      |            |                            |               |               |              |               |
| N <sub>2</sub> /600-1                                 | 53.3                           | 27.4                 | 19.2       | 286.38                     | 287.43        | 288.58        | 1.25         | 1.40          |
| N <sub>2</sub> /600-3                                 | 57.0                           | 27.2                 | 15.7       | 286.58                     | 287.98        | 289.08        | 1.28         | 1.96          |
| 700-1                                                 | 56.2                           | 27.2                 | 16.5       | 286.51                     | 288.01        | 289.36        | 1.43         | 2.52          |
| N <sub>2</sub> /800-1                                 | 57.2 ± 5.2                     | 29.2 ± 1.5           | 13.6 ± 3.6 | 286.40 ± 0.17              | 287.78 ± 0.28 | 289.68 ± 0.57 | 1.41 ± 0.05  |               |
| N <sub>2</sub> /800-3                                 | 57.3                           | 26.3                 | 16.4       | 286.52                     | 288.02        | 289.32        | 1.53         | 2.45          |
| N <sub>2</sub> /1000-1                                | 61.2                           | 25.2                 | 13.6       | 286.52                     | 287.97        | 289.02        | 1.58         | 2.41          |
| <b>HTT 700-1000°C</b>                                 |                                |                      |            |                            |               |               |              |               |
| <b>Average</b>                                        | 58.0 ± 2.2                     | 27.0 ± 1.7           | 15.0 ± 1.6 | 286.49 ± 0.06              | 287.94 ± 0.11 | 289.34 ± 0.27 |              |               |
| <b>Series 2</b>                                       |                                |                      |            |                            |               |               |              |               |
| CO <sub>2</sub> /700-1                                | 60.7                           | 25.4                 | 13.9       | 286.48                     | 287.88        | 288.78        | 1.34         | 2.25          |
| CO <sub>2</sub> /700-3                                | 55.3                           | 28.4                 | 16.3       | 286.55                     | 288.00        | 288.75        | 1.47         | 2.77          |
| CO <sub>2</sub> /800-1                                | 60.1                           | 24.5                 | 15.4       | 286.53                     | 287.93        | 288.83        | 1.46         | 2.82          |
| CO <sub>2</sub> /800-3                                | 61.0                           | 27.3                 | 11.7       | 286.50                     | 288.10        | 288.95        | 1.53         | 2.81          |
| CO <sub>2</sub> /1000-1                               | 56.5                           | 27.2                 | 16.3       | 286.48                     | 288.08        | 289.48        | 1.62         | 2.04          |
| <b>HTT 700-1000°C</b>                                 |                                |                      |            |                            |               |               |              |               |
| <b>Average</b>                                        | 58.7 ± 2.6                     | 26.6 ± 1.6           | 14.7 ± 1.9 | 286.51 ± 0.03              | 288.00 ± 0.10 | 288.96 ± 0.30 |              |               |
| <b>Series 3</b>                                       |                                |                      |            |                            |               |               |              |               |
| <b>Chemical Treatment</b>                             |                                |                      |            |                            |               |               |              |               |
| CO <sub>2</sub> /800-1-K <sub>2</sub> CO <sub>3</sub> | 56.1 ± 1.0                     | 24.6 ± 0.5<br>0.02 ± | 19.3 ± 0.6 | 286.32 ± 0.03              | 287.82 ± 0.12 | 289.22 ± 0.18 | 1.40 ± 0.19  |               |
| CO <sub>2</sub> /800-1-HNO <sub>3</sub>               | 55.5 ± 0.3                     | 0.001                | 44.5 ± 0.3 | 286.67 ± 0.04              | 287.12 ± 0.03 | 288.62 ± 0.02 | 1.55 ± 0.02  |               |
| CO <sub>2</sub> /800-1-<br>HNO <sub>3</sub> /400      | 64.7                           | 19.7                 | 15.6       | 286.60                     | 288.40        | 288.80        | 1.56         | 6.96          |

|                                                  |            |            |            |               |               |               |             |       |
|--------------------------------------------------|------------|------------|------------|---------------|---------------|---------------|-------------|-------|
| CO <sub>2</sub> /800-1-<br>HNO <sub>3</sub> /800 | 93.1       | 0.2        | 6.7        | 287.14        | 288.29        | 288.74        | 1.93        | 10.04 |
| N <sub>2</sub> /800-1-NH <sub>3</sub> /600       | 57.6       | 24.7       | 17.6       | 286.51        | 288.01        | 289.46        | 1.67        | 2.84  |
| N <sub>2</sub> /800-1-NH <sub>3</sub> /800       | 62.9 ± 0.2 | 23.3 ± 1.1 | 13.8 ± 0.9 | 286.21 ± 0.06 | 287.88 ± 0.15 | 289.60 ± 0.43 | 1.57 ± 0.04 |       |

b)

| O 1s spectra<br>Carbon<br>Sample                      | Distribution of Peak<br>Area (%) |              |          |                                         |             | Binding Energies<br>(eV) |             |              |                                         |             | FWHM<br>(eV) | Casi $\chi^2$ | Abbe   |
|-------------------------------------------------------|----------------------------------|--------------|----------|-----------------------------------------|-------------|--------------------------|-------------|--------------|-----------------------------------------|-------------|--------------|---------------|--------|
|                                                       | C=O                              | CO/OH-<br>Al | CO/OH-Ar | Chem<br>H <sub>2</sub> O/O <sub>2</sub> | $\pi-\pi^*$ | C=O                      | CO/OH<br>Al | CO/OH-<br>Ar | Chem<br>H <sub>2</sub> O/O <sub>2</sub> | $\pi-\pi^*$ |              |               |        |
| <b>Series 1</b>                                       |                                  |              |          |                                         |             |                          |             |              |                                         |             |              |               |        |
| N <sub>2</sub> /600-1                                 | 25.1                             | 36.7         | 34.0     | 2.8                                     | 1.3         | 531.28                   | 532.48      | 533.78       | 535.63                                  | 537.63      | 1.77         | 0.887         | 1.031  |
| N <sub>2</sub> /600-3                                 | 24.2                             | 38.6         | 33.2     | 2.7                                     | 1.4         | 531.18                   | 532.38      | 533.73       | 535.48                                  | 537.28      | 1.79         | 0.903         | 0.951  |
| N <sub>2</sub> /700-1                                 | 36.3                             | 38.0         | 21.8     | 3.1                                     | 0.8         | 531.16                   | 532.46      | 533.66       | 535.86                                  | 538.71      | 1.89         | 0.978         | 0.917  |
| N <sub>2</sub> /800-1                                 | 38.27                            | 34.32        | 22.57    | 3.49                                    | 1.36        | 531.06                   | 532.36      | 533.58       | 535.23                                  | 537.06      | 1.79         | 0.849         | 0.912  |
|                                                       | 0.91                             | 1.64         | 3.06     | 0.19                                    | 0.32        | ± 0.03                   | ± 0.17      | ± 0.20       | ± 0.2                                   | ± 0.38      | ± 0.05       | 0.646         | 0.800  |
| N <sub>2</sub> /800-3                                 | 32.8                             | 37.8         | 24.3     | 3.6                                     | 1.5         | 531.07                   | 532.37      | 533.57       | 535.17                                  | 537.02      | 1.77         | 0.998         | 0.923  |
| N <sub>2</sub> /1000-1                                | 31.3                             | 38.0         | 25.8     | 3.6                                     | 1.3         | 531.07                   | 532.22      | 533.47       | 535.02                                  | 536.67      | 1.77         | 0.887         | 1.096  |
| <b>HTT 700-1000C</b>                                  |                                  |              |          |                                         |             |                          |             |              |                                         |             |              |               |        |
| Average                                               | 35.5                             | 36.6         | 23.5     | 3.5                                     | 1.3         | 531.08                   | 532.35      | 533.57       | 535.30                                  | 537.30      | 1.80         |               |        |
| St Dev                                                | 3.4                              | 2.1          | 2.1      | 0.2                                     | 0.3         | 0.05                     | 0.12        | 0.12         | 0.34                                    | 0.83        | 0.06         |               |        |
| <b>Series 2</b>                                       |                                  |              |          |                                         |             |                          |             |              |                                         |             |              |               |        |
| CO <sub>2</sub> /700-1                                | 29.3                             | 36.1         | 29.4     | 3.4                                     | 1.8         | 531.13                   | 532.33      | 533.53       | 535.08                                  | 536.78      | 1.73         | 0.923         | 0.911  |
| CO <sub>2</sub> /700-3                                | 36.4                             | 33.1         | 24.1     | 4.6                                     | 1.8         | 531.15                   | 532.40      | 533.60       | 535.65                                  | 537.85      | 1.87         | 1.002         | 0.730  |
| CO <sub>2</sub> /800-1                                | 30.6                             | 35.7         | 28.2     | 4.1                                     | 1.4         | 531.03                   | 532.23      | 533.53       | 535.28                                  | 537.23      | 1.80         | 0.975         | 1.015  |
| CO <sub>2</sub> /800-3                                | 29.7                             | 35.9         | 29.2     | 3.6                                     | 1.7         | 531.00                   | 532.10      | 533.40       | 535.10                                  | 536.90      | 1.82         | 0.993         | 0.903  |
| CO <sub>2</sub> /1000-1                               | 36.3                             | 36.4         | 23.2     | 3.2                                     | 0.8         | 531.03                   | 532.23      | 533.43       | 534.98                                  | 536.43      | 1.80         | 0.901         | 1.051  |
| <b>HTT 700-1000C</b>                                  |                                  |              |          |                                         |             |                          |             |              |                                         |             |              |               |        |
| Average                                               | 32.5                             | 35.4         | 26.8     | 3.8                                     | 1.5         | 531.07                   | 532.26      | 533.50       | 535.22                                  | 537.04      | 1.80         |               |        |
| St Dev                                                | 3.6                              | 1.3          | 2.9      | 0.6                                     | 0.4         | 0.07                     | 0.11        | 0.08         | 0.27                                    | 0.54        | 0.05         |               |        |
| <b>Series 3</b>                                       |                                  |              |          |                                         |             |                          |             |              |                                         |             |              |               |        |
| CO <sub>2</sub> /800-1-K <sub>2</sub> CO <sub>3</sub> | 11.74                            | 43.76        | 36.18    | 5.66                                    | 2.66        | 530.93                   | 532.21      | 533.51       | 535.71                                  | 537.96      | 1.89         | 0.840-        | 0.791- |
|                                                       | ± 2.01                           | ± 1.89       | ± 0.26   | ± 0.19                                  | ± 0.32      | ± 0.11                   | ± 0.02      | ± 0.07       | ± 0.10                                  | ± 0.32      | ± 0.07       | 0.890         | 0.934  |

|                                              |        |        |        |        |        |        |        |        |        |        |        |        |        |
|----------------------------------------------|--------|--------|--------|--------|--------|--------|--------|--------|--------|--------|--------|--------|--------|
| CO <sub>2</sub> /800-1-HNO <sub>3</sub>      | 33.54  | 13.32  | 46.93  | 4.47   | 1.74   | 531.57 | 532.22 | 533.29 | 535.57 | 537.80 | 1.99   | 1.086- | 0.523- |
|                                              | ± 0.35 | ± 0.66 | ± 0.45 | ± 0.30 | ± 0.14 | ± 0.03 | ± 0.02 | ± 0.06 | ± 0.02 | ± 0.14 | ± 0.02 | 1.249  | 0.762  |
| CO <sub>2</sub> /800-1-HNO <sub>3</sub> /400 | 29.96  | 18.78  | 43.68  | 5.01   | 2.57   | 531.35 | 532.20 | 533.50 | 535.95 | 537.95 | 2.00   | 1.494  | 0.418  |
| CO <sub>2</sub> /800-1-HNO <sub>3</sub> /800 | 13.32  | 56.19  | 23.75  | 4.32   | 2.42   | 530.95 | 532.21 | 533.67 | 535.63 | 537.80 | 1.63   | 1.501  | 0.571  |
| N <sub>2</sub> /800-1-NH <sub>3</sub> /600   | 27.84  | 47.21  | 21.61  | 3.34   | -      | 531.06 | 532.21 | 533.71 | 535.96 | -      | 1.67   | 0.875  | 0.868  |
| N <sub>2</sub> /800-1-NH <sub>3</sub> /800   | 32.91  | 39.58  | 20.12  | 5.28   | 2.11   | 530.68 | 532.23 | 533.53 | 535.73 | 537.58 | 2.00   | 0.830  | 0.924  |

c)

| Carbon Sample                                | Distribution of Peak Areas (%) |                    |              |                 |                 | Binding Energies (eV) |                   |              |                  |                  | FWHM (eV)      | Casi $\chi^2$   | Abbe            |
|----------------------------------------------|--------------------------------|--------------------|--------------|-----------------|-----------------|-----------------------|-------------------|--------------|------------------|------------------|----------------|-----------------|-----------------|
|                                              | N-sp <sup>2</sup>              | N- sp <sup>3</sup> | N-5 pyrrolic | NCO             | Nitro           | N-sp <sup>2</sup>     | N-sp <sup>3</sup> | N-5 pyrrolic | N-Q              | Nitro            |                |                 |                 |
| CO <sub>2</sub> /800-1-HNO <sub>3</sub>      |                                | 33.28<br>±1.23     |              | 19.65<br>± 0.78 | 47.07<br>± 0.71 |                       | 399.87<br>±0.22   |              | 401.87<br>± 0.10 | 405.79<br>± 0.03 | 1.94<br>± 0.22 | 0.968-<br>1.038 | 0.712-<br>0.789 |
| CO <sub>2</sub> /800-1-HNO <sub>3</sub> /400 | 21.46                          | 49.51              | 21.08        | 7.95            |                 | 398.55                | 399.55            | 400.60       | 402.30           |                  | 1.69           | 0.892           | 0.975           |

d)

| N 1s spectra                               | Distribution of Peak Areas (%) |                   |                              |       |       |       | Binding Energies (eV) |                   |                              |        |        |        |         | FWHM (eV) | Casi $\chi^2$ | Abbe |
|--------------------------------------------|--------------------------------|-------------------|------------------------------|-------|-------|-------|-----------------------|-------------------|------------------------------|--------|--------|--------|---------|-----------|---------------|------|
|                                            | Carbon                         | N-sp <sup>2</sup> | N-sp <sup>3</sup> , pyrrolic | N-Q   | N-X   | N?    | N-oxide               | N-sp <sup>2</sup> | N-sp <sup>3</sup> , pyrrolic | N-Q    | N-X    | N?     | N-oxide |           |               |      |
| Sample                                     |                                |                   |                              |       |       |       |                       |                   |                              |        |        |        |         |           |               |      |
| N <sub>2</sub> /800-1-NH <sub>3</sub> /600 | 48.31                          | 25.27             | 11.96                        | 6.78  | 4.40  | 3.27  | 398.36                | 399.91            | 401.18                       | 402.53 | 404.13 | 405.78 | 1.54    | 1.010     | 0.944         |      |
| N <sub>2</sub> /800-1-NH <sub>3</sub> /800 | 49.54                          | 26.69             | 11.43                        | 5.44  | 4.12  | 2.78  | 398.18                | 399.92            | 401.22                       | 402.74 | 404.37 | 406.02 | 1.52    | 1.156-    | 0.865-        |      |
|                                            | ±1.44                          | ±0.18             | ±0.06                        | ±1.01 | ±0.52 | ±0.20 | ±0.02                 | ±0.06             | ±0.06                        | ±0.31  | ±0.34  | ±0.34  | ±0.06   | 1.443     | 0.994         |      |

Some weak curve resolution peaks in the high energy tail of the spectra are within the noise level.

## 4. Temperature Programmed Desorption

a)

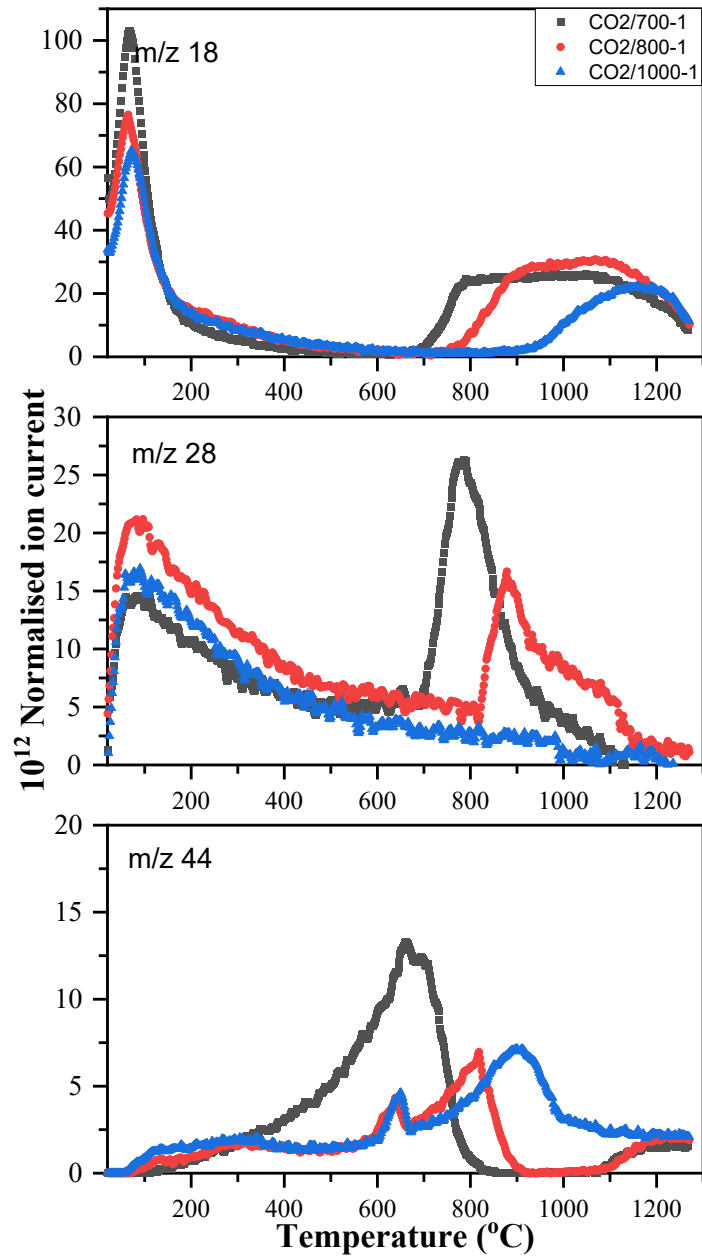



b)

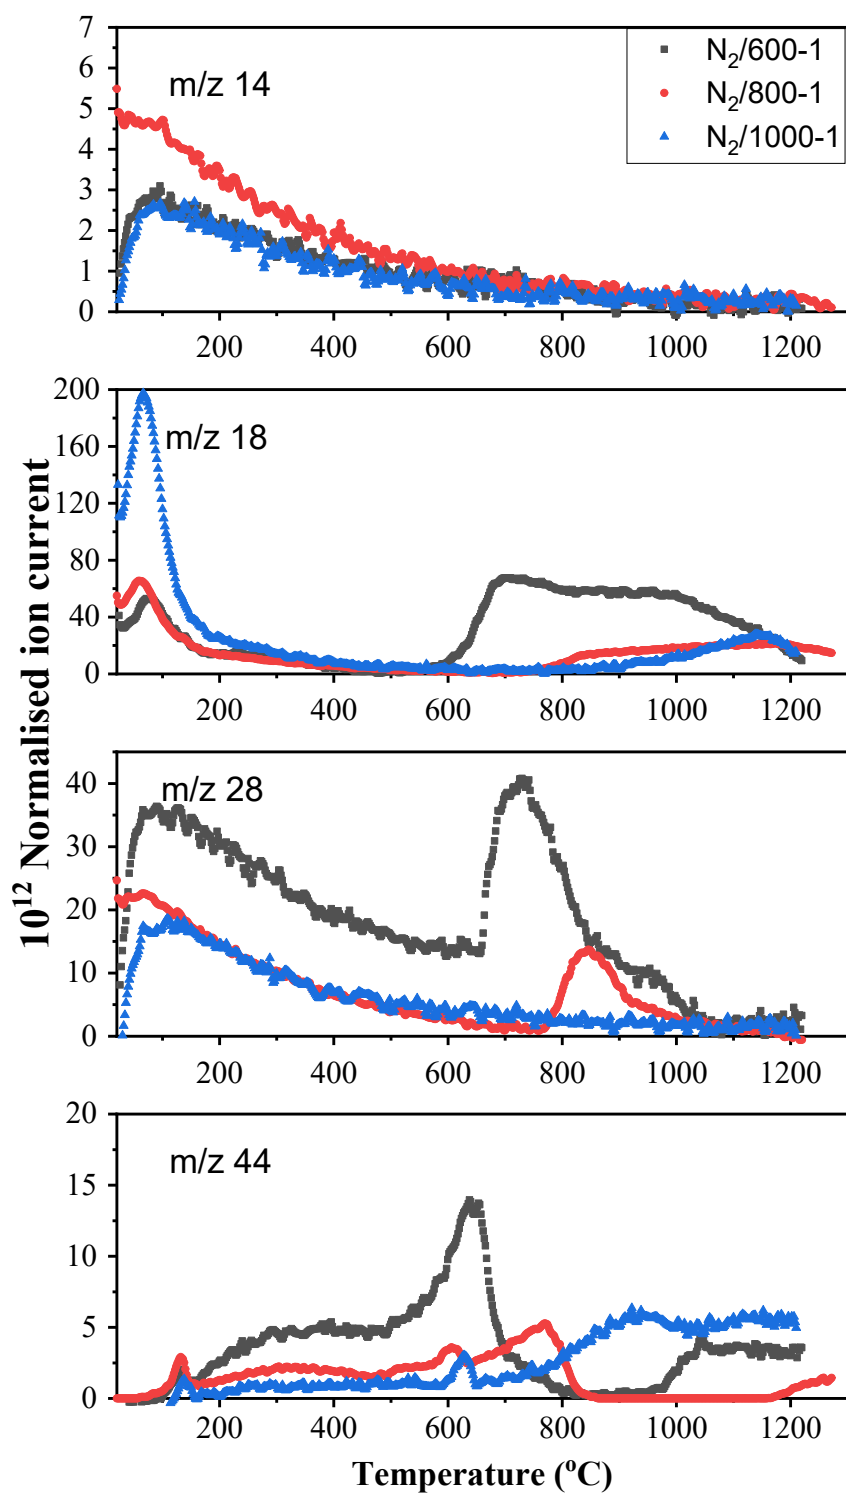

Figure S29 Comparison of TPD profiles for a) CO<sub>2</sub> series carbonization series 2, carbon CO<sub>2</sub>/700-1, CO<sub>2</sub>/800-1 and CO<sub>2</sub>/1000-1, and b) nitrogen carbonization series 1: carbons N<sub>2</sub>/600-1, N<sub>2</sub>/800-1 and N<sub>2</sub>/1000-1

## 5. Thermogravimetric Analysis

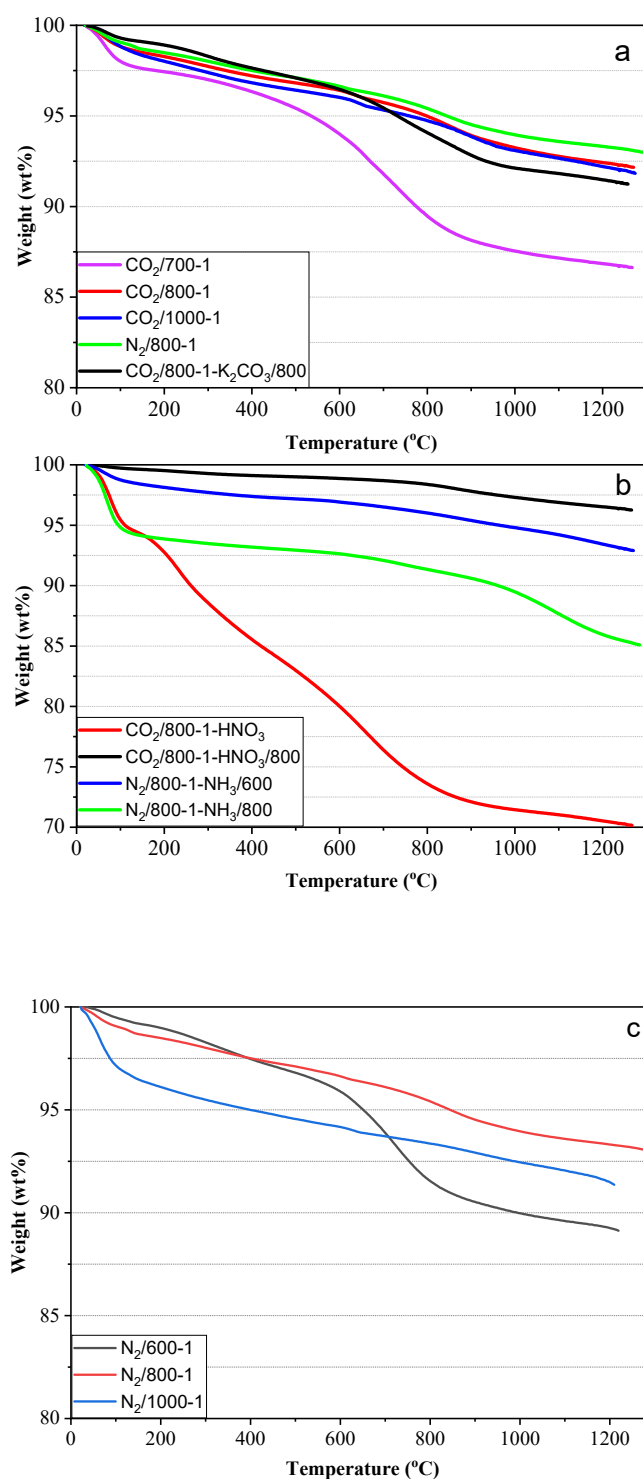

Figure S30 Comparison of thermogravimetric profiles for a) carbons CO<sub>2</sub>/700-1, CO<sub>2</sub>/800-1, CO<sub>2</sub>/1000-1, N<sub>2</sub>/800-1 and CO<sub>2</sub>/800-1-K<sub>2</sub>CO<sub>3</sub>/800 b) carbons CO<sub>2</sub>/800-1-HNO<sub>3</sub>, CO<sub>2</sub>/800-1-HNO<sub>3</sub>/800, N<sub>2</sub>/800-1-NH<sub>3</sub>/600 and N<sub>2</sub>/800-1-NH<sub>3</sub>/800 and c) carbons N<sub>2</sub>/600-1, N<sub>2</sub>/800-1 and N<sub>2</sub>/1000-1

## 6. Powder X-ray diffraction

a)

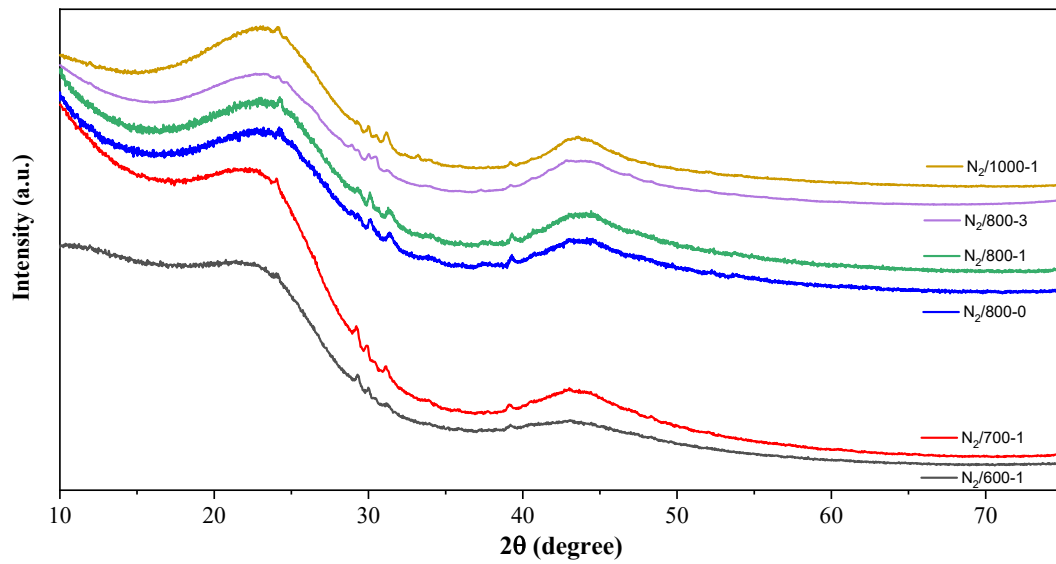

b)

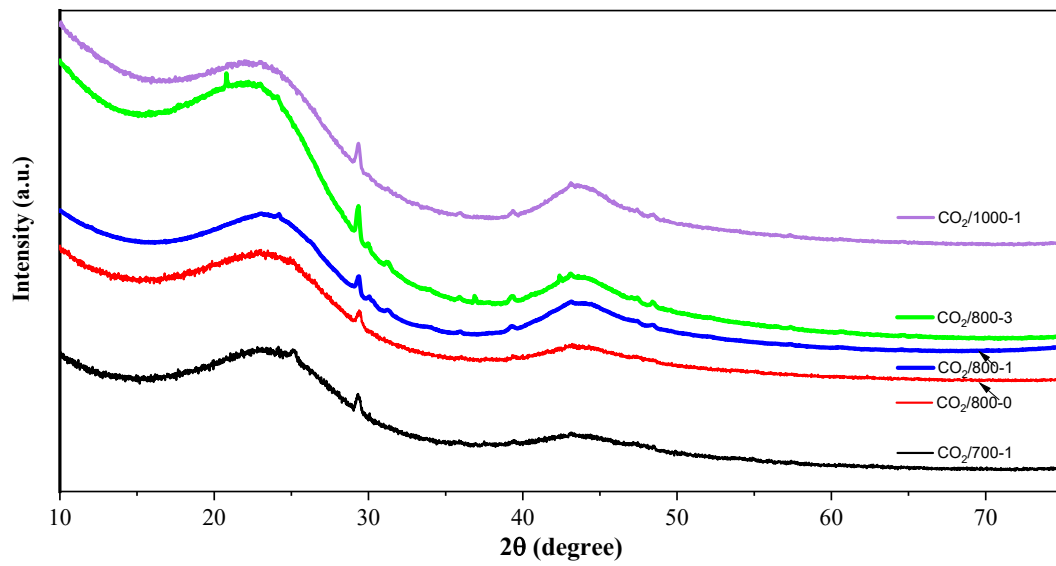

c)

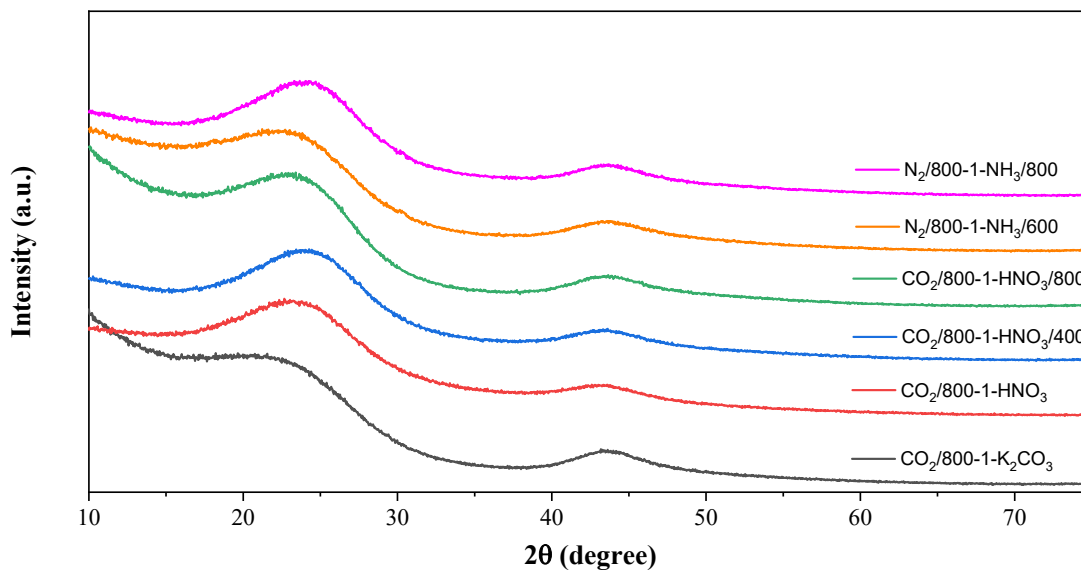

Figure S31 Comparison of powder X-ray diffraction profiles for a) Carbons prepared in a nitrogen atmosphere (Series 1), b) Carbons prepared in a carbon dioxide atmosphere (Series 2), and c) Functionalized carbons.

Table S6. Repeatability Studies for XRD Parameters (Å)

Series 1

| Sample    | N <sub>2</sub> /800-3 |       |         |        |
|-----------|-----------------------|-------|---------|--------|
|           | Run 1                 | Run 2 | Average | St dev |
| $L_c$     | 9.79                  | 10.17 | 9.98    | 0.26   |
| $d_{002}$ | 3.83                  | 3.83  | 3.83    | 0.001  |
| $L_a$     | 23.26                 | 23.89 | 23.57   | 0.44   |

Series 2

| Sample    | CO <sub>2</sub> /800-1 |       |         |        |
|-----------|------------------------|-------|---------|--------|
|           | Run 1                  | Run 2 | Average | St dev |
| $L_c$     | 9.91                   | 10.36 | 10.14   | 0.32   |
| $d_{002}$ | 3.86                   | 3.85  | 3.86    | 0.005  |
| $L_a$     | 23.15                  | 23.92 | 23.53   | 0.54   |

| Sample    | CO <sub>2</sub> /800-3 |       |         |        |
|-----------|------------------------|-------|---------|--------|
|           | Run 1                  | Run 2 | Average | St dev |
| $L_c$     | 9.28                   | 9.37  | 9.32    | 0.06   |
| $d_{002}$ | 3.86                   | 3.86  | 3.86    | 0.00   |
| $L_a$     | 24.65                  | 23.97 | 24.31   | 0.48   |

## 7. Raman Spectroscopy

### 7.1 Repeatability of peak curve fitting

Table S7. Repeatability Studies for Curve Resolution of the Raman Spectra of Carbons

| Series Sample             | $I_D/I_G$ | $A_D/A_G$ | D Raman Peak<br>FWHM <sub>D</sub><br>cm <sup>-1</sup> | G Raman Peak<br>FWHM <sub>G</sub><br>cm <sup>-1</sup> | D Raman Peak<br>cm <sup>-1</sup> | G Raman Peak<br>cm <sup>-1</sup> | $\chi^2$ | R <sup>2</sup> |
|---------------------------|-----------|-----------|-------------------------------------------------------|-------------------------------------------------------|----------------------------------|----------------------------------|----------|----------------|
| <b>Series 1</b>           |           |           |                                                       |                                                       |                                  |                                  |          |                |
| N <sub>2</sub> /700-0 R1  | 0.828     | 1.440     | 163.8                                                 | 63.8                                                  | 1337.8                           | 1597.5                           | 87.2     | 0.993          |
| N <sub>2</sub> /700-0 R2  | 0.798     | 1.492     | 164.6                                                 | 59.7                                                  | 1337.2                           | 1597.5                           | 61.3     | 0.990          |
| Average                   | 0.813     | 1.466     | 164.2                                                 | 61.7                                                  | 1337.5                           | 1597.5                           |          |                |
| St Dev                    | 0.021     | 0.037     | 0.6                                                   | 2.9                                                   | 0.5                              | 0.03                             |          |                |
|                           |           |           |                                                       |                                                       |                                  |                                  |          |                |
| N <sub>2</sub> /700-1 R1  | 0.847     | 1.534     | 163.3                                                 | 61.1                                                  | 1336.6                           | 1598.5                           | 66.0     | 0.992          |
| N <sub>2</sub> /700-1 R2  | 0.855     | 1.537     | 162.3                                                 | 61.2                                                  | 1336.0                           | 1597.8                           | 54.5     | 0.990          |
| Average                   | 0.851     | 1.535     | 162.8                                                 | 61.1                                                  | 1336.3                           | 1598.2                           |          |                |
| St Dev                    | 0.006     | 0.002     | 0.7                                                   | 0.1                                                   | 0.4                              | 0.5                              |          |                |
|                           |           |           |                                                       |                                                       |                                  |                                  |          |                |
| N <sub>2</sub> /700-3 R1  | 0.903     | 1.543     | 160.2                                                 | 63.5                                                  | 1337.6                           | 1597.5                           | 63.0     | 0.992          |
| N <sub>2</sub> /700-3 R2  | 0.928     | 1.599     | 161.6                                                 | 63.6                                                  | 1337.3                           | 1596.2                           | 52.9     | 0.985          |
| Average                   | 0.916     | 1.571     | 160.9                                                 | 63.6                                                  | 1337.4                           | 1596.9                           |          |                |
| St Dev                    | 0.018     | 0.039     | 1.0                                                   | 0.04                                                  | 0.3                              | 0.9                              |          |                |
|                           |           |           |                                                       |                                                       |                                  |                                  |          |                |
| N <sub>2</sub> /800-0 R1  | 0.941     | 1.670     | 155.0                                                 | 59.2                                                  | 1336.8                           | 1599.5                           | 60.5     | 0.991          |
| N <sub>2</sub> /800-0 R2  | 1.042     | 1.751     | 151.1                                                 | 60.9                                                  | 1338.1                           | 1597.6                           | 46.8     | 0.976          |
| Average                   | 0.992     | 1.711     | 153.1                                                 | 60.1                                                  | 1337.5                           | 1598.6                           |          |                |
| St Dev                    | 0.071     | 0.057     | 2.7                                                   | 1.2                                                   | 0.9                              | 1.4                              |          |                |
|                           |           |           |                                                       |                                                       |                                  |                                  |          |                |
| N <sub>2</sub> /800-1 R1  | 0.972     | 1.617     | 156.1                                                 | 63.6                                                  | 1338.1                           | 1599.6                           | 34.8     | 0.992          |
| N <sub>2</sub> /800-1 R2  | 0.992     | 1.715     | 158.3                                                 | 62.1                                                  | 1339.0                           | 1597.1                           | 28.7     | 0.977          |
| Average                   | 0.982     | 1.666     | 157.2                                                 | 62.8                                                  | 1338.5                           | 1598.3                           |          |                |
| St Dev                    | 0.014     | 0.069     | 1.6                                                   | 1.0                                                   | 0.6                              | 1.8                              |          |                |
|                           |           |           |                                                       |                                                       |                                  |                                  |          |                |
| N <sub>2</sub> /800-3 R1  | 1.014     | 1.711     | 152.1                                                 | 61.1                                                  | 1338.9                           | 1599.6                           | 43.8     | 0.991          |
| N <sub>2</sub> /800-3 R2  | 1.018     | 1.598     | 157.1                                                 | 67.9                                                  | 1341.4                           | 1600.5                           | 37.5     | 0.987          |
| Average                   | 1.016     | 1.654     | 154.6                                                 | 64.5                                                  | 1340.1                           | 1600.0                           |          |                |
| St Dev                    | 0.003     | 0.080     | 3.5                                                   | 4.8                                                   | 1.8                              | 0.7                              |          |                |
|                           |           |           |                                                       |                                                       |                                  |                                  |          |                |
| <b>Series 2</b>           |           |           |                                                       |                                                       |                                  |                                  |          |                |
| CO <sub>2</sub> /700-1 R1 | 0.880     | 1.438     | 160.9                                                 | 66.8                                                  | 1339.5                           | 1599.2                           | 50.4     | 0.992          |

|                           |       |       |       |      |        |        |      |       |
|---------------------------|-------|-------|-------|------|--------|--------|------|-------|
| CO <sub>2</sub> /700-1 R2 | 0.903 | 1.600 | 162.5 | 62.2 | 1335.9 | 1594.7 | 41.3 | 0.991 |
| CO <sub>2</sub> /700-1 R3 | 0.907 | 1.578 | 160.4 | 62.4 | 1336.5 | 1597.0 | 45.3 | 0.991 |
| Average                   | 0.897 | 1.539 | 161.3 | 63.8 | 1337.3 | 1597.0 |      |       |
| St Dev                    | 0.014 | 0.088 | 1.1   | 2.6  | 2.0    | 2.3    |      |       |
| CO <sub>2</sub> /700-3 R1 | 0.926 | 1.583 | 159.1 | 63.1 | 1337.5 | 1597.3 | 42.9 | 0.991 |
| CO <sub>2</sub> /700-3 R2 | 0.952 | 1.641 | 158.5 | 62.3 | 1336.5 | 1596.8 | 55.0 | 0.993 |
| CO <sub>2</sub> /700-3 R3 | 0.958 | 1.626 | 158.3 | 63.2 | 1335.6 | 1594.8 | 39.2 | 0.987 |
| Average                   | 0.945 | 1.617 | 158.6 | 62.8 | 1336.5 | 1596.3 |      |       |
| St Dev                    | 0.017 | 0.030 | 0.4   | 0.5  | 1.0    | 1.3    |      |       |
| CO <sub>2</sub> /800-1 R1 | 0.987 | 1.667 | 151.3 | 60.7 | 1337.5 | 1598.1 | 40.7 | 0.992 |
| CO <sub>2</sub> /800-1 R2 | 1.015 | 1.688 | 155.4 | 63.4 | 1338.1 | 1596.6 | 35.2 | 0.985 |
| Average                   | 1.001 | 1.677 | 153.4 | 62.0 | 1337.8 | 1597.4 |      |       |
| St Dev                    | 0.020 | 0.015 | 2.9   | 1.9  | 0.4    | 1.1    |      |       |
| CO <sub>2</sub> /800-3 R1 | 1.052 | 1.748 | 138.7 | 56.5 | 1337.2 | 1597.9 | 53.4 | 0.990 |
| CO <sub>2</sub> /800-3 R2 | 1.048 | 1.692 | 145.8 | 61.2 | 1336.6 | 1596.6 | 38.6 | 0.985 |
| Average                   | 1.050 | 1.720 | 142.3 | 58.9 | 1336.9 | 1597.3 |      |       |
| St Dev                    | 0.002 | 0.040 | 5.0   | 3.3  | 0.4    | 0.9    |      |       |

FWHM = Full Width Half Maximum, R1 = Run 1, R2 = Run 2, R3 = Run 3.

a)

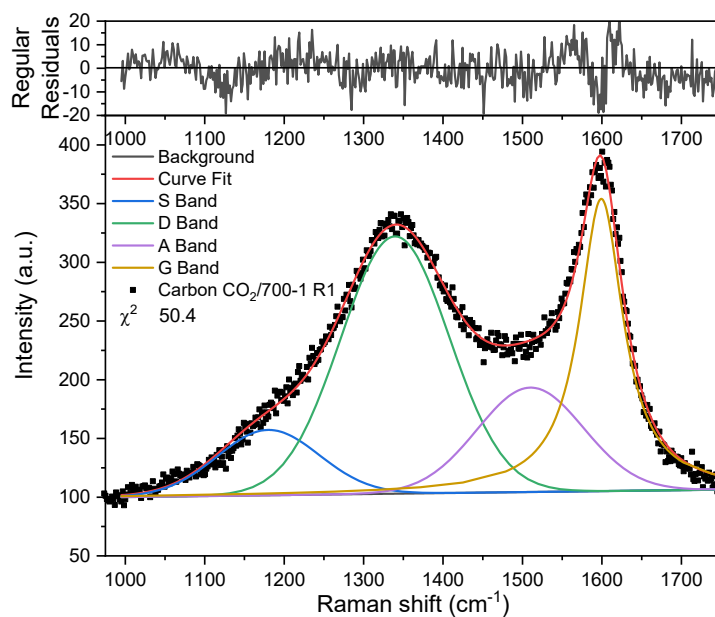

b)

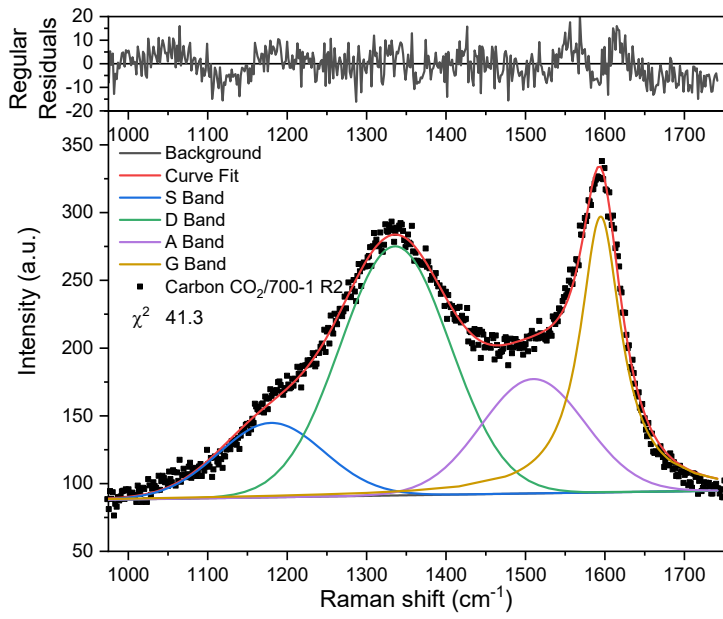

c)

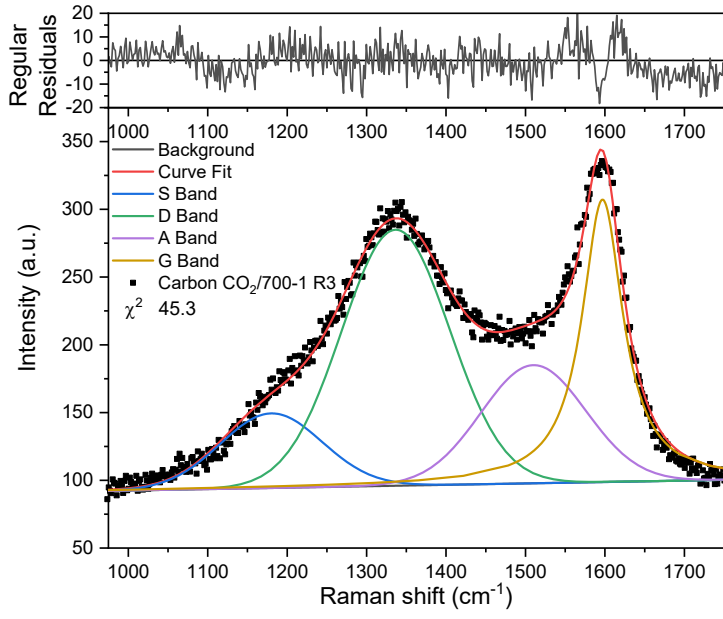

d)

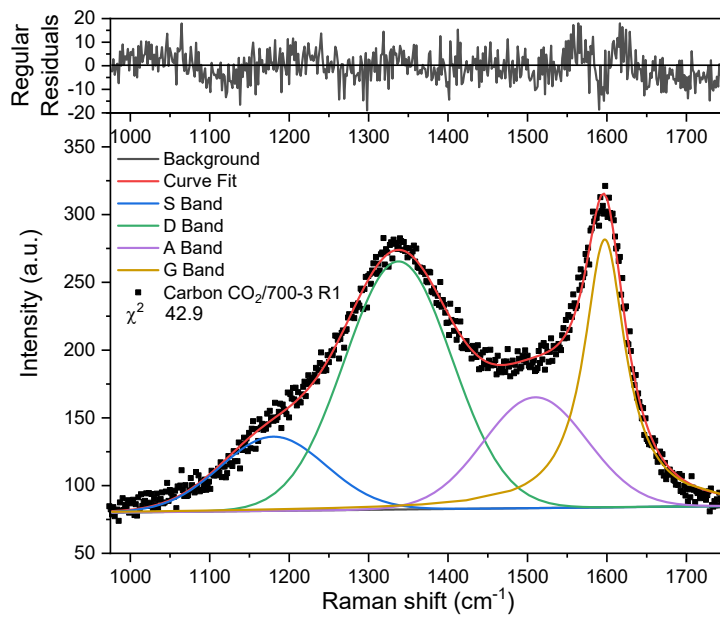

e)

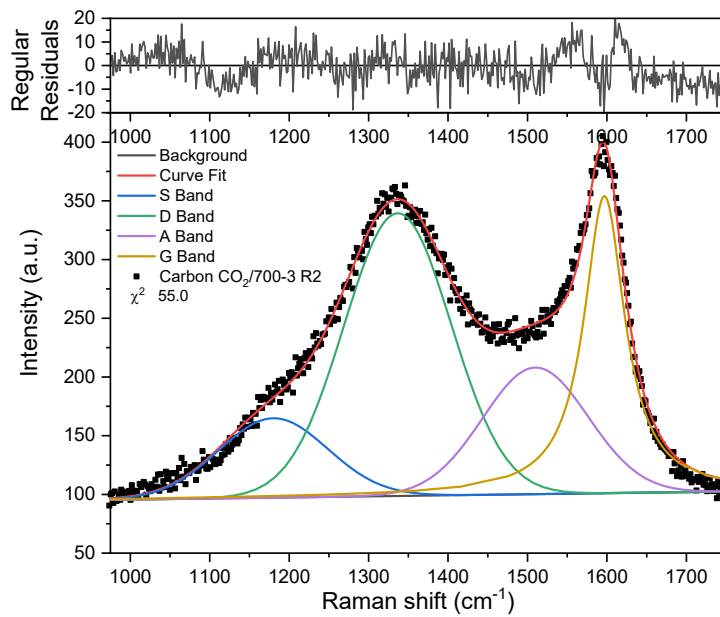



f)

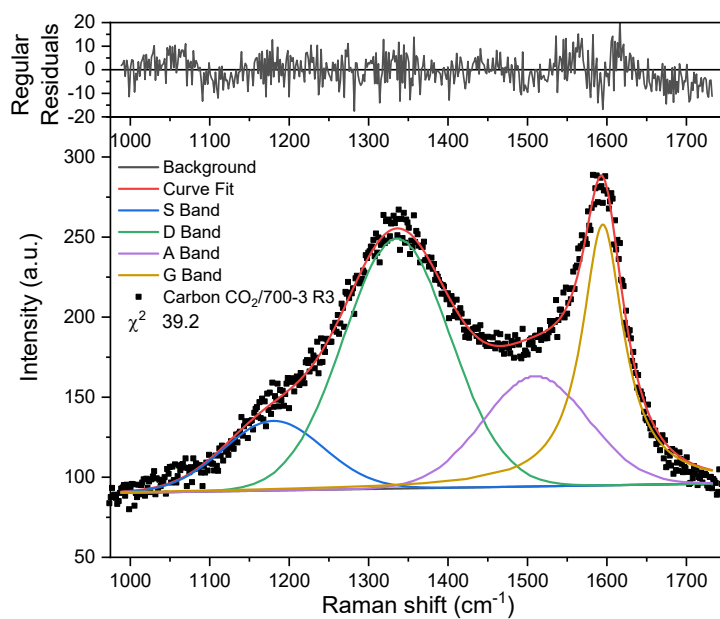

Figure S32. Repeatability of curve resolution of Raman spectra a) Carbon CO<sub>2</sub>/700-1 Run 1, b) Carbon CO<sub>2</sub>/700-1 Run 2, c) Carbon CO<sub>2</sub>/700-1 Run 3, d) Carbon CO<sub>2</sub>/700-3 Run 1, e) Carbon CO<sub>2</sub>/700-3 Run 2 and f) Carbon CO<sub>2</sub>/700-3 Run 3

## 7.2 Raman Spectra, Curve Fitting, and Residuals

a)

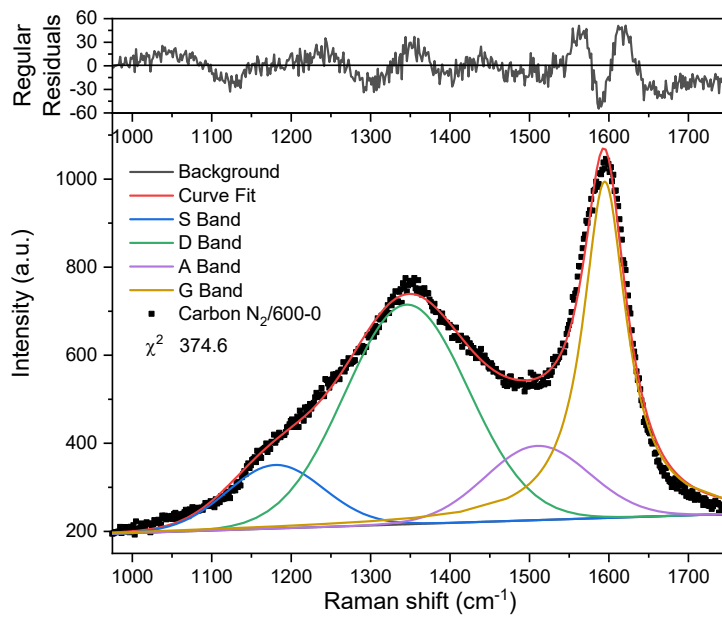

b)

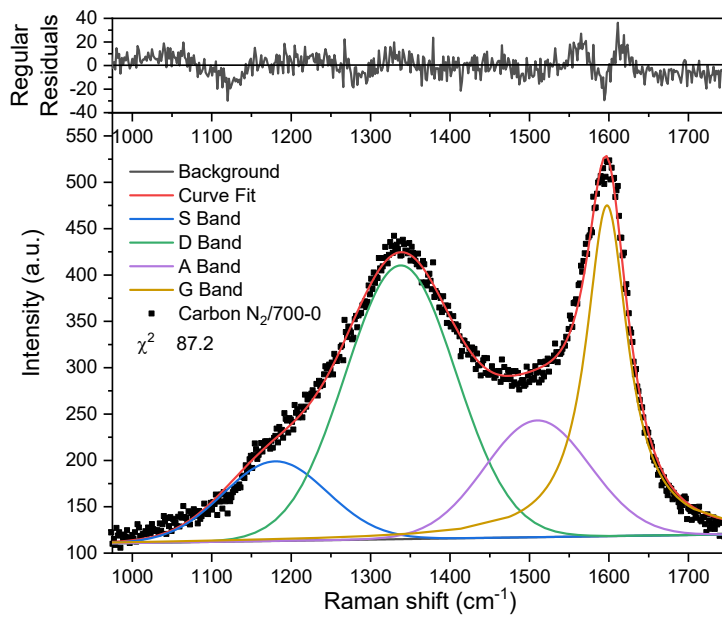

c)

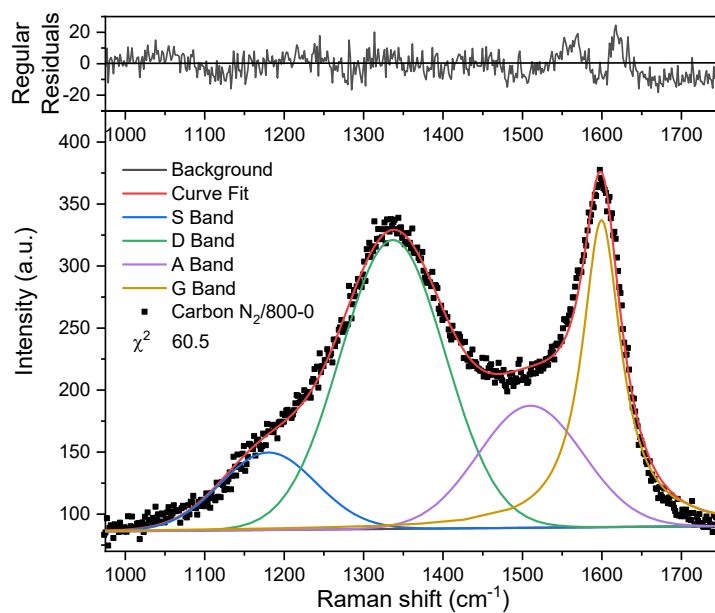

d)

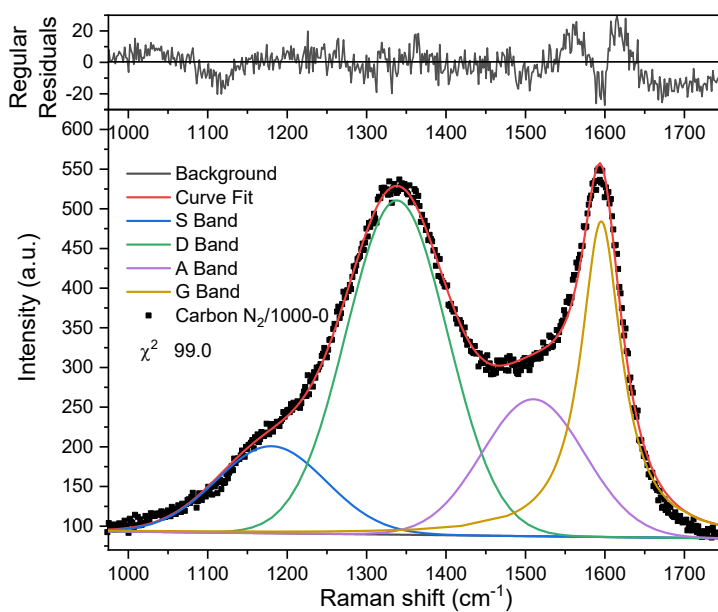

Figure S33. Raman spectra, peak fitting, and residuals for the Series 1 carbons prepared with a hold time of 0 h in a nitrogen atmosphere as a function of HTT a) Carbon N<sub>2</sub>/600-0, b) Carbon N<sub>2</sub>/700-0 c) Carbon N<sub>2</sub>/800-0 and d) Carbon N<sub>2</sub>/1000-0

a)

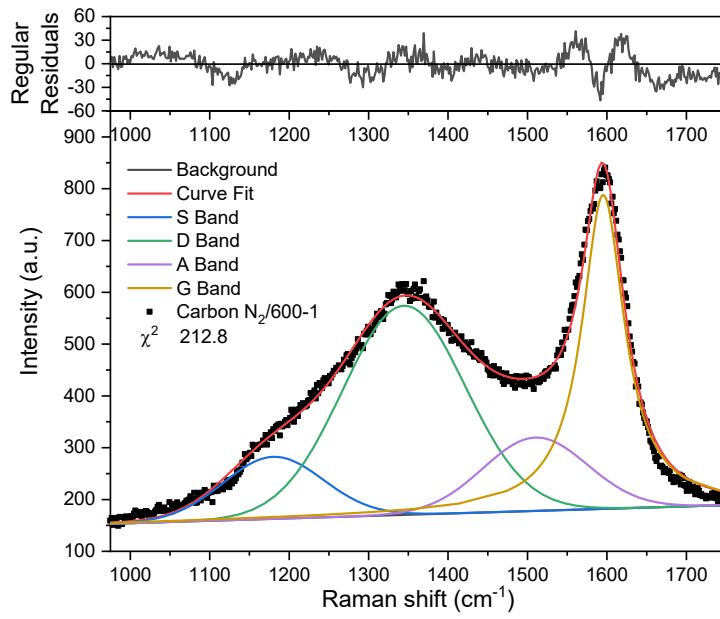

b)

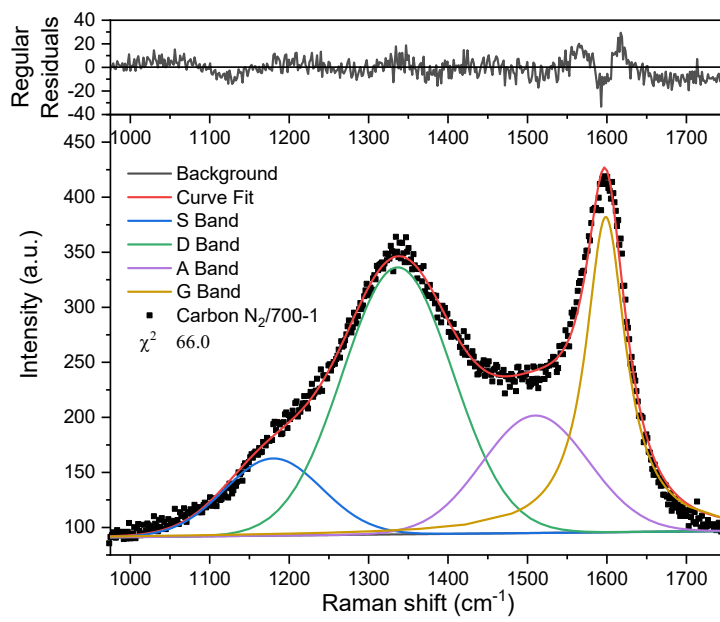

c)

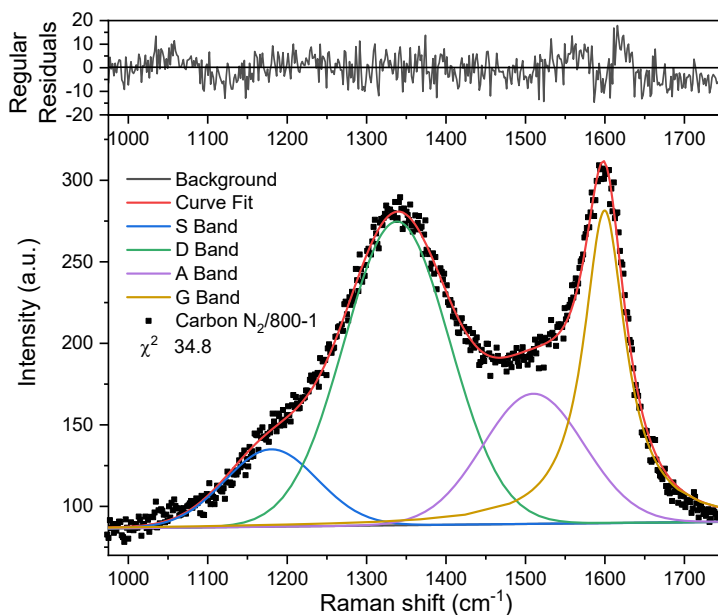

d)

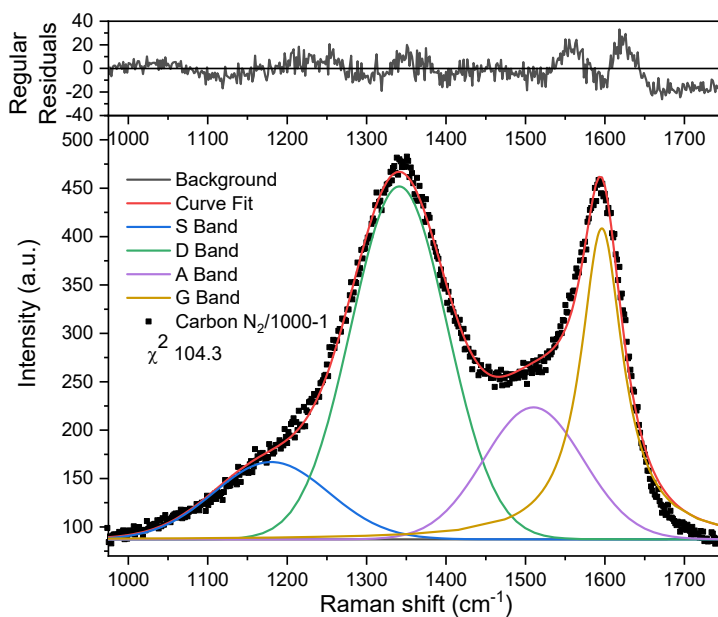

Figure S34. Raman spectra, peak fitting, and residuals for the Series 1 carbons prepared with a hold time of 1 h in a nitrogen atmosphere as a function of HTT a) Carbon N<sub>2</sub>/600-1, b) Carbon N<sub>2</sub>/700-1 c) Carbon N<sub>2</sub>/800-1 and d) Carbon N<sub>2</sub>/1000-1

a)

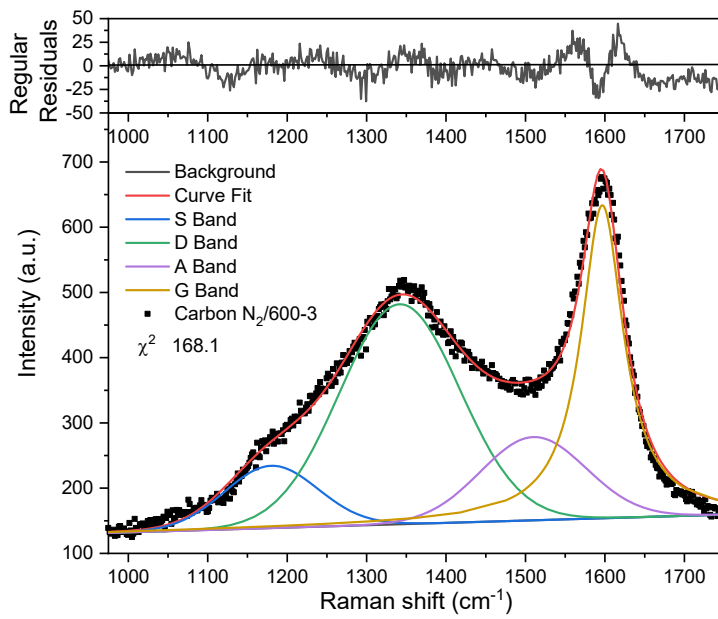

b)

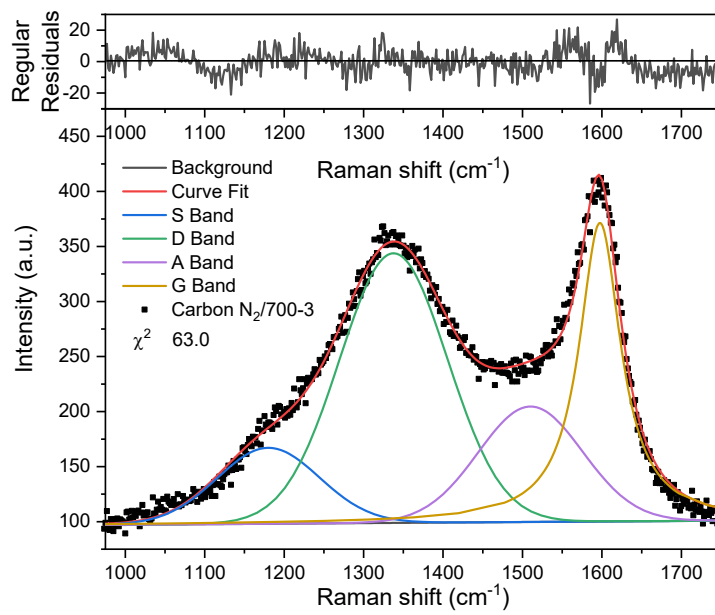

c)

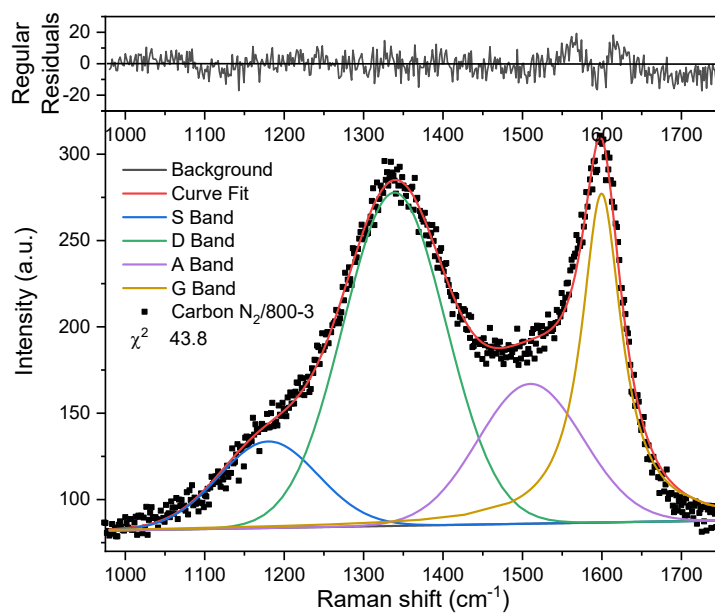

d)

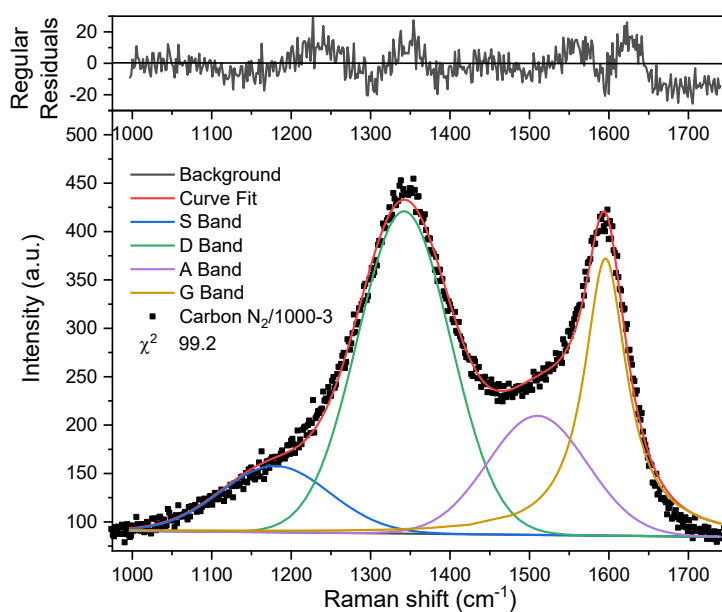

Figure S35. Raman spectra, peak fitting, and residuals for the Series 1 carbons prepared with a hold time of 3 h in a nitrogen atmosphere as a function of HTT a) Carbon N<sub>2</sub>/600-3, b) Carbon N<sub>2</sub>/700-3 c) Carbon N<sub>2</sub>/800-3, and d) Carbon N<sub>2</sub>/1000-3

a)

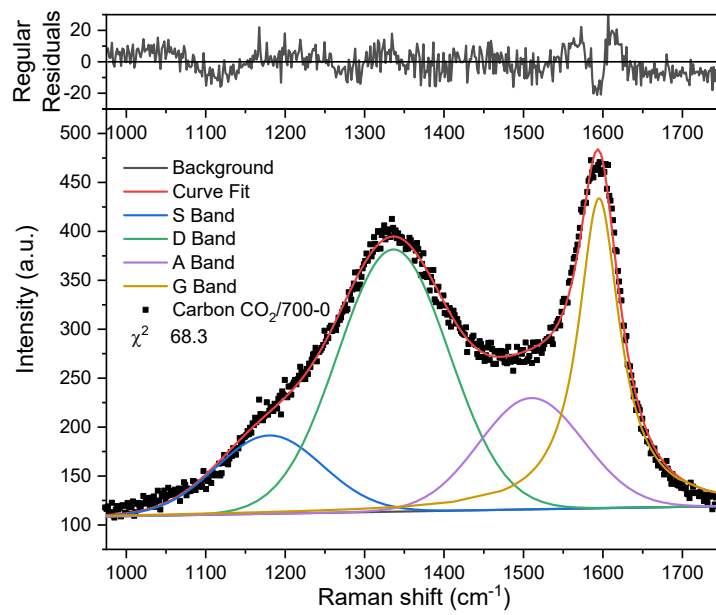

b)

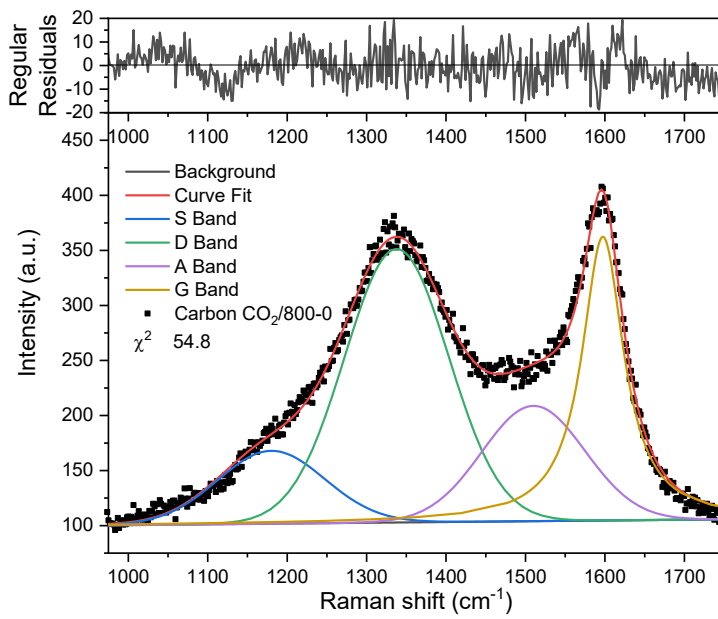



c)

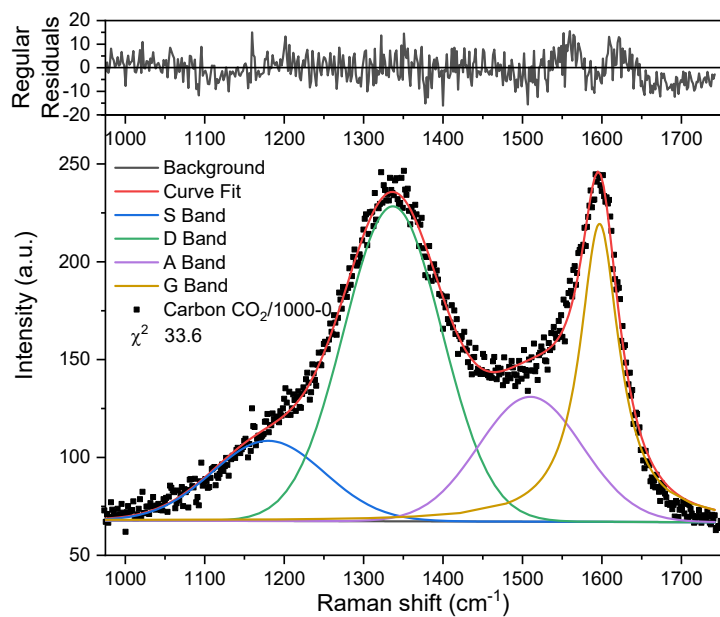

Figure S36. Raman spectra, peak fitting, and residuals for the Series 2 carbons with a hold time of 0 h prepared in a carbon dioxide atmosphere as a function of HTT a) Carbon CO<sub>2</sub>/700-0, b) Carbon CO<sub>2</sub>/800-0 and c) Carbon CO<sub>2</sub>/1000-0.

a)

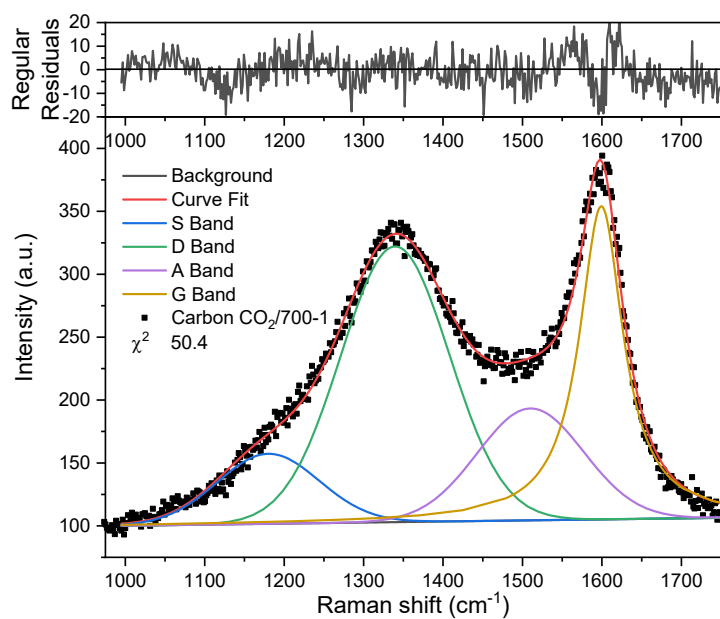

b)

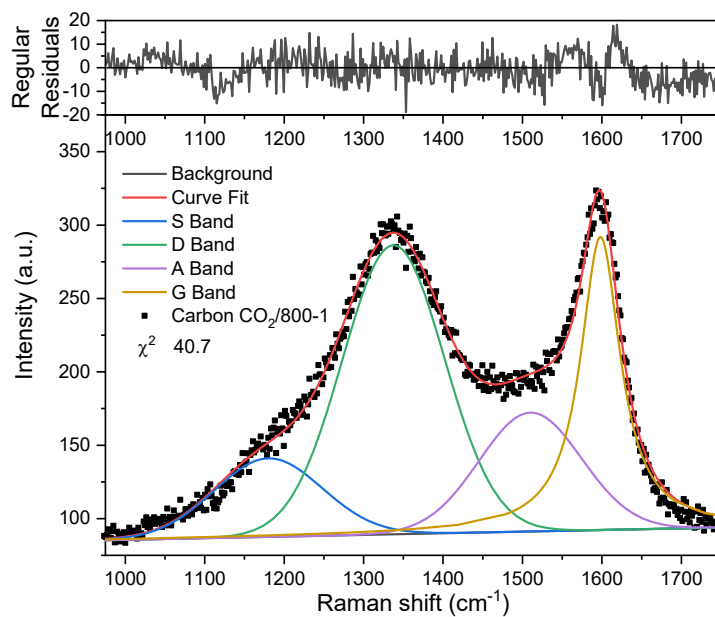

c)

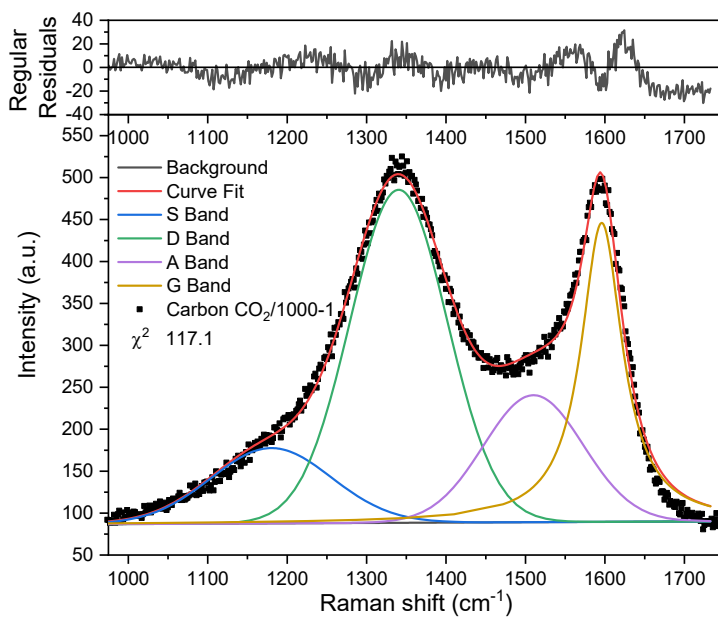

Figure S37. Raman spectra, peak fitting, and residuals for the Series 2 carbons with a hold time of 1 h prepared in a carbon dioxide atmosphere as a function of HTT a) Carbon  $\text{CO}_2/700-1$ , b) Carbon  $\text{CO}_2/800-1$  and c) Carbon  $\text{CO}_2/1000-1$ .

a)

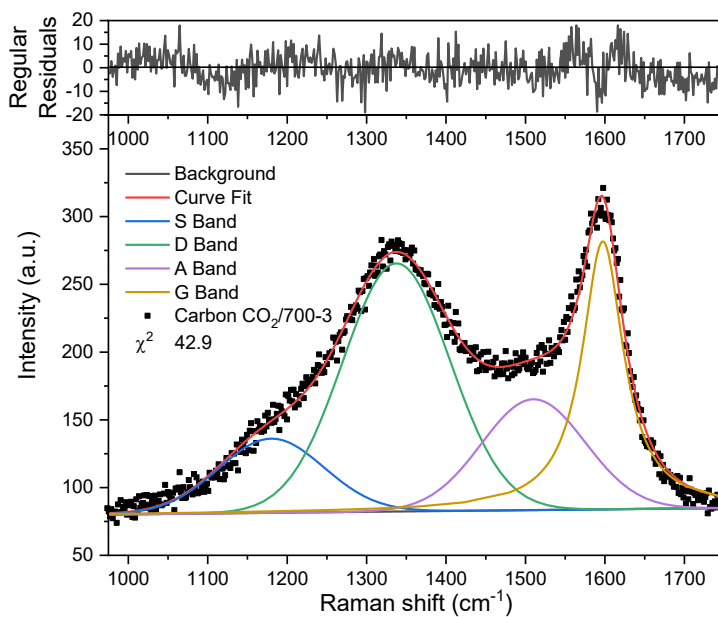

b)

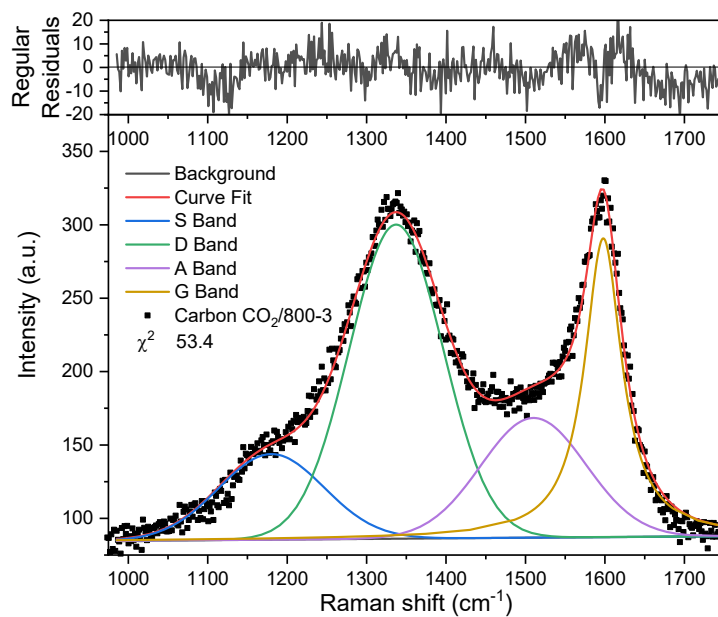

Figure S38. Raman spectra, peak fitting, and residuals for the Series 2 carbons with a hold time of 3 h prepared in a carbon dioxide atmosphere as a function of HTT a) Carbon  $\text{CO}_2/700-3$  and b) Carbon  $\text{CO}_2/800-3$ .

a)

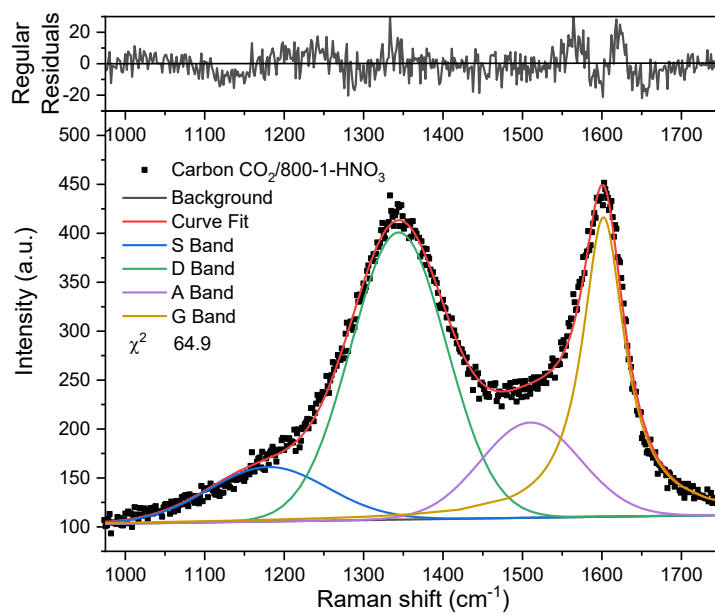

b)

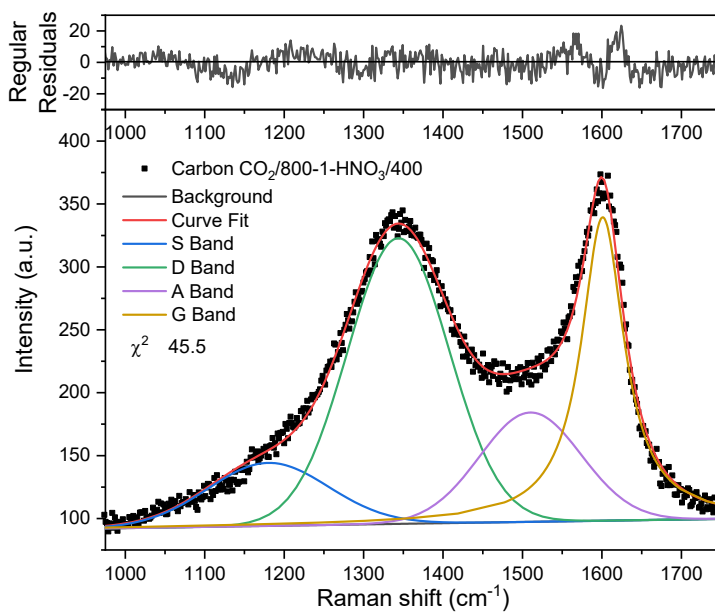

c)

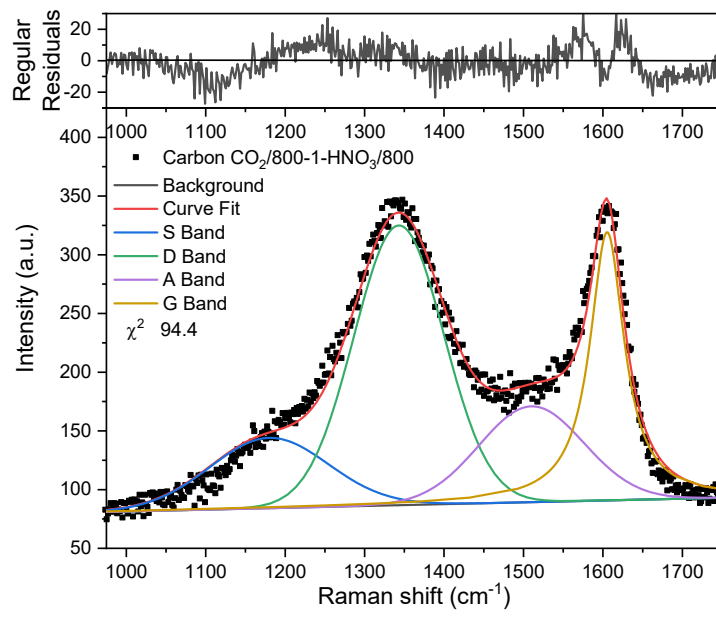

d)

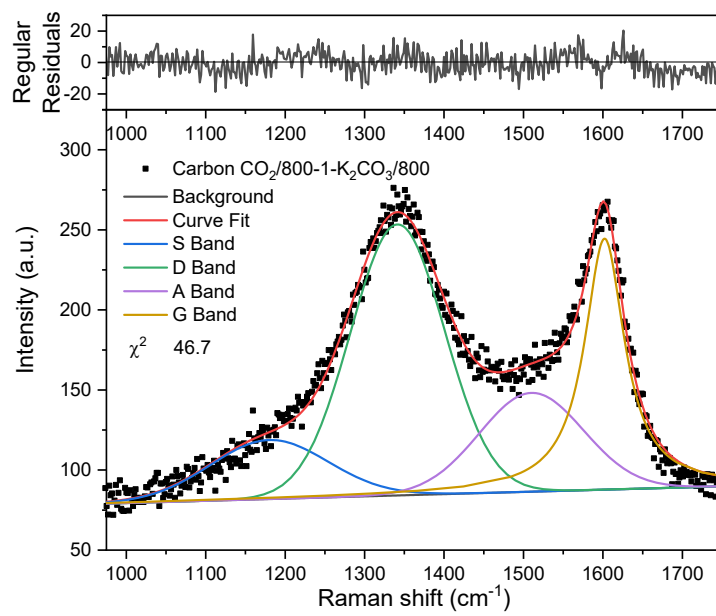

e)

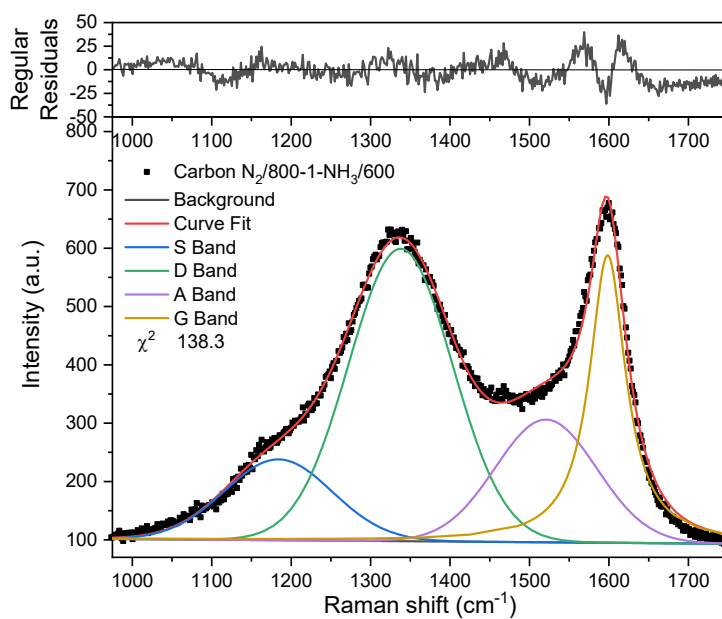

f)

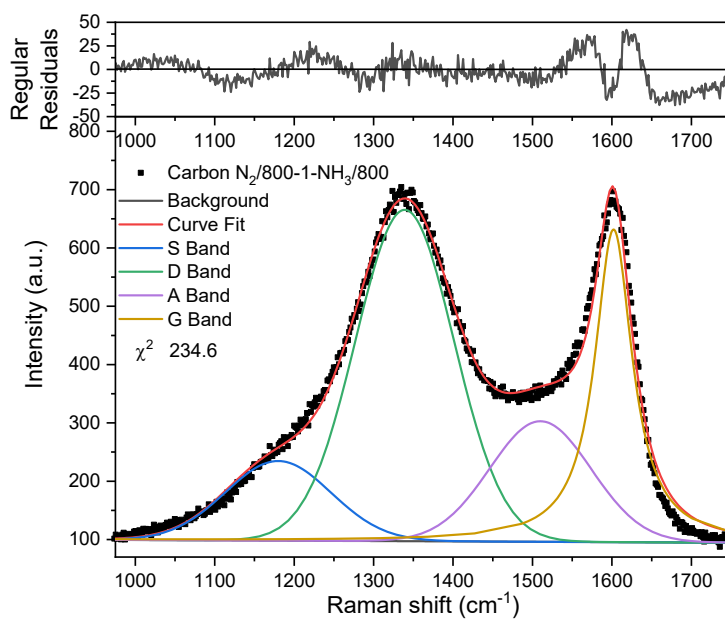

Figure S39. Raman spectra, peak fitting, and residuals for the functionalized carbons a) Carbon  $\text{CO}_2/800\text{-1-HNO}_3$ , b) Carbon  $\text{CO}_2/800\text{-1-HNO}_3/400$ , c) Carbon  $\text{CO}_2/800\text{-1-HNO}_3/800$ , d) Carbon  $\text{CO}_2/800\text{-1-K}_2\text{CO}_3/800$ , e) Carbon  $\text{N}_2/800\text{-1-NH}_3/600$  and f) Carbon  $\text{N}_2/800\text{-1-NH}_3/800$ .

### 7.3 Comparisons of Raman, X-ray Diffraction, and Carbonization Temperature Data

a)

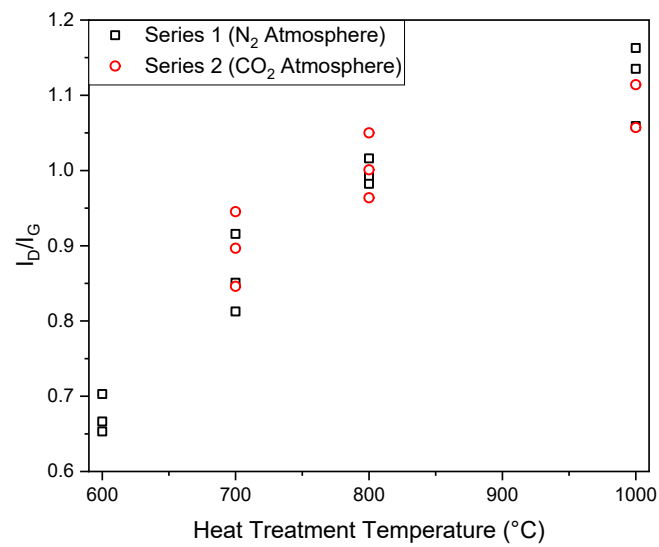

b)

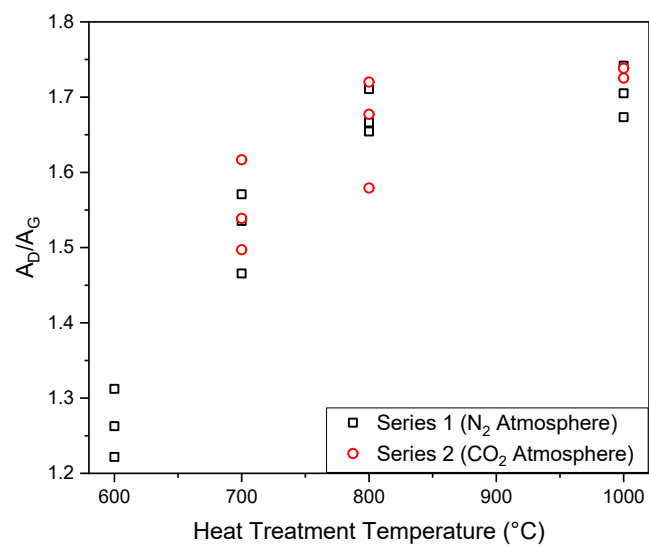

c)

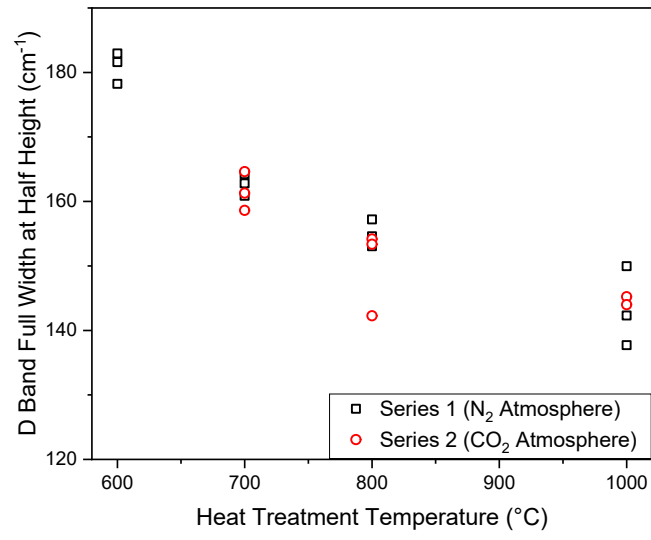

d)

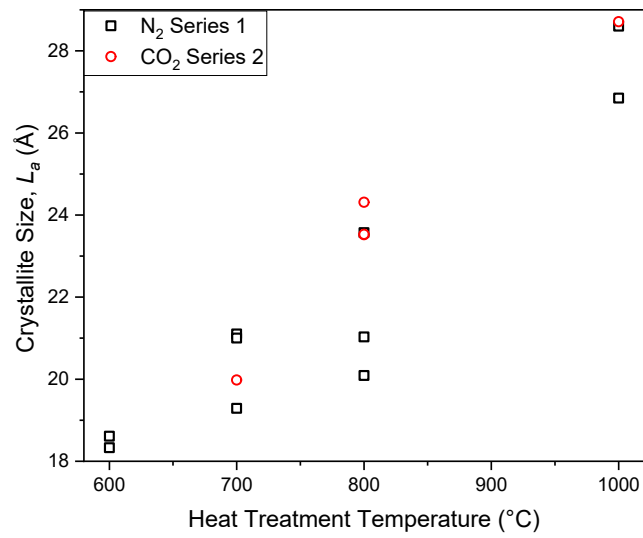



e)

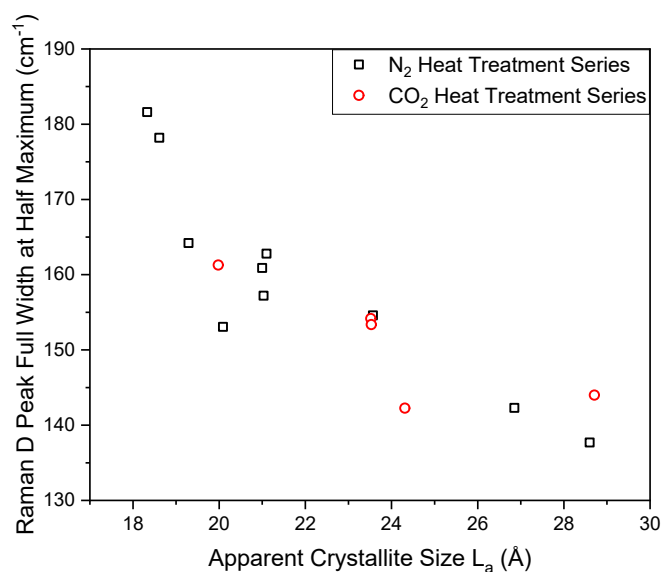

f)

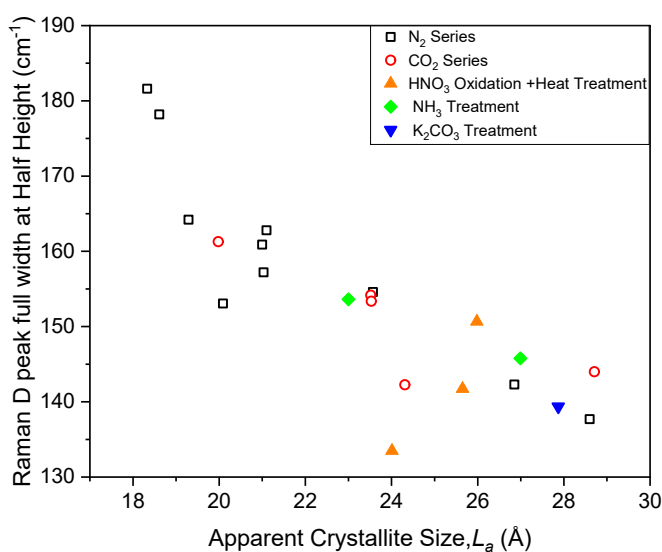

Figure S40. Comparison of the Raman D peak full width at half height, the apparent crystallite size ( $L_a$ ), and heat treatment temperature (HTT) for carbons prepared under carbon dioxide and nitrogen atmospheres a) The variation of  $I_D/I_G$  with HTT, b) The variation of  $A_G/A_G$  with HTT, c) The variation of Raman D peak full width at half height with HTT, d) The variation of apparent crystallite size ( $L_a$ ) with HTT, e) The variation of Raman D peak full width at half height with crystallite size ( $L_a$ ) for carbonization series and f) ) The variation of Raman D peak full width at half height with crystallite size ( $L_a$ ) for carbonization under N<sub>2</sub> and CO<sub>2</sub> series and chemical treatment of carbons CO<sub>2</sub>/800-1 and N<sub>2</sub>/800-1.

## 8 Fourier Transform Infrared Spectroscopy

a)

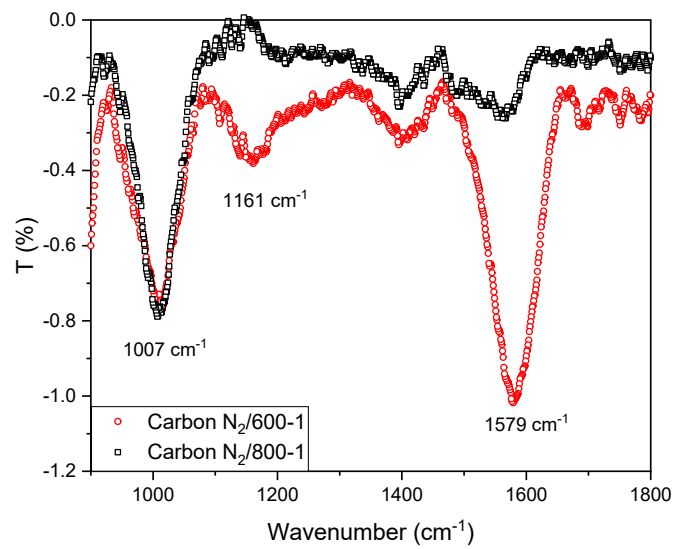

b)

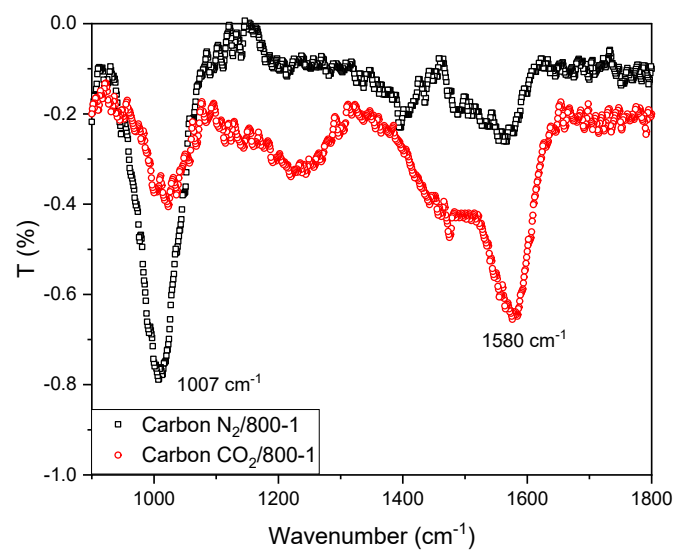

c)

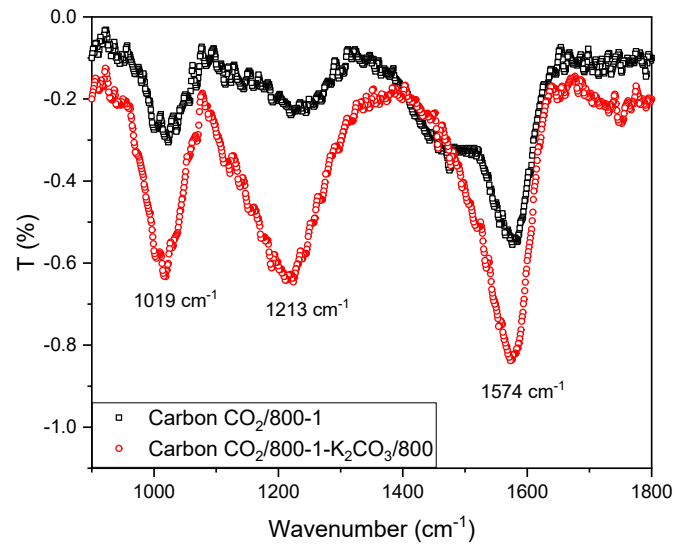

d)

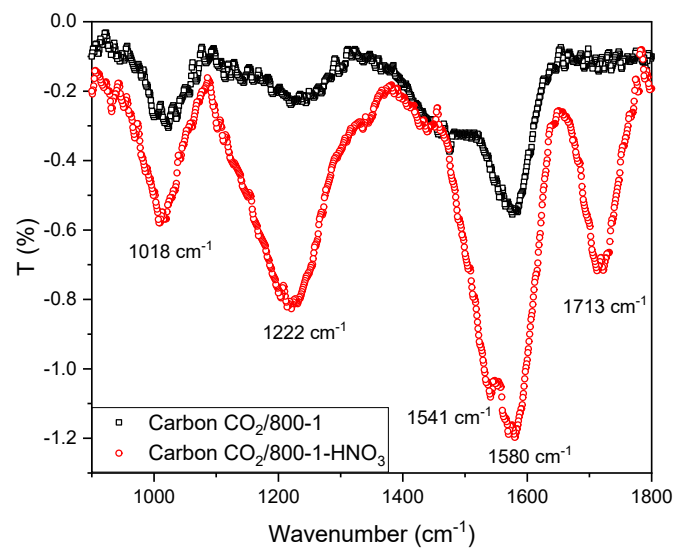

e)

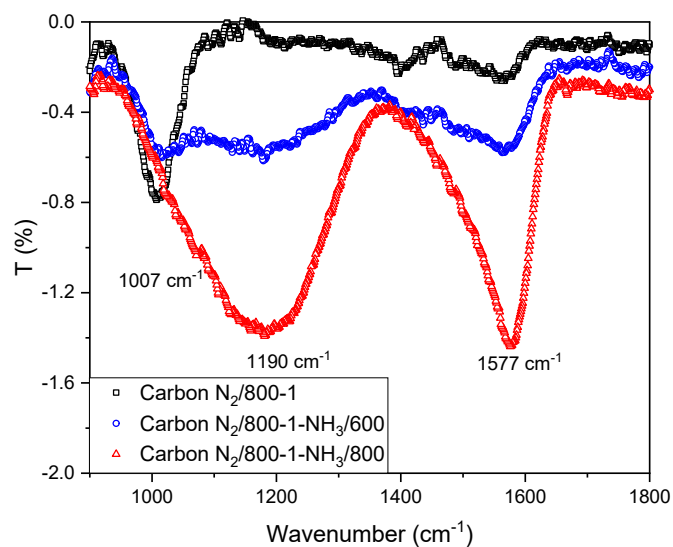

Figure S41 Comparison of infrared spectra of various carbons a) Carbons N<sub>2</sub>/600-1 and N<sub>2</sub>/800-1, b) Carbons N<sub>2</sub>/800-1 and CO<sub>2</sub>/800-1, c) Carbons CO<sub>2</sub>/800-1 and CO<sub>2</sub>/800-1-K<sub>2</sub>CO<sub>3</sub>/800, d) Carbons CO<sub>2</sub>/800-1 and CO<sub>2</sub>/800-1-HNO<sub>3</sub>, e) Carbons N<sub>2</sub>/800-1, N<sub>2</sub>/800-1-NH<sub>3</sub>/600 and N<sub>2</sub>/800-1-NH<sub>3</sub>/800. Spectra have been modified by background subtraction for comparison purposes.

## 9 Electron Microscopy

TEM-BF and TEM-DF images of carbon sample (CO<sub>2</sub>/800-0) are illustrated in Figures S41a and b. SAED pattern (Figure 41c) fits a graphite hexagonal structure ( $a = 0.242 \pm 0.005$  nm,  $c = 0.660 \pm 0.005$  nm). These values are similar to the values for the structure of hexagonal graphite ( $a = 0.2461$  nm,  $c = 0.6708$  nm)<sup>1</sup>. TEM-DF image (Figure S41b) of (002) diffraction beam shows the contrast from crystalline graphite appearing bright in the image. The distance between carbon layers is shown in Figure S41d. This confirms the presence of small carbon nanostructures randomly distributed throughout the carbon.

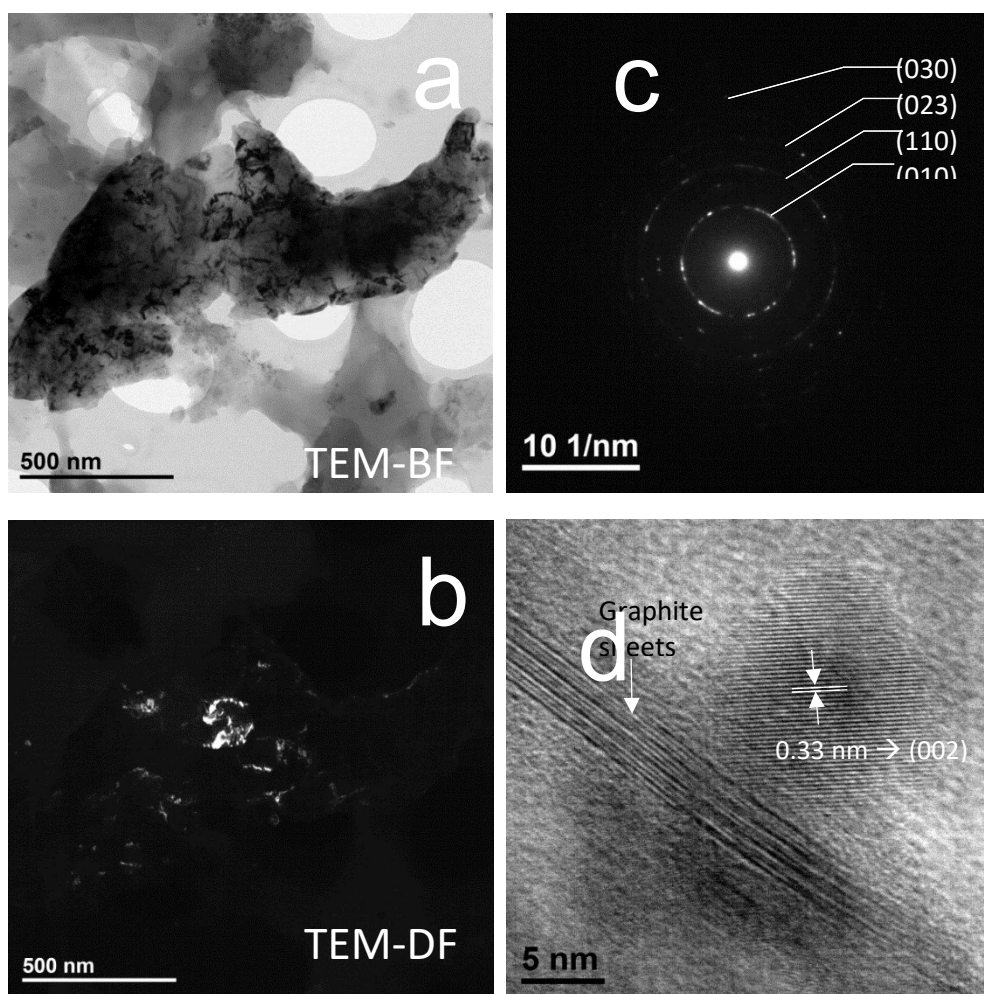

Figure S42. Electron micrographs (a) TEM-BF image, (b) TEM-DF image, (c) SAED pattern, and (d) HR-TEM of carbon CO<sub>2</sub>/800-0.

## 10. Comparison of Characterization Data for the HNO<sub>3</sub> Functionalized Carbons

a)

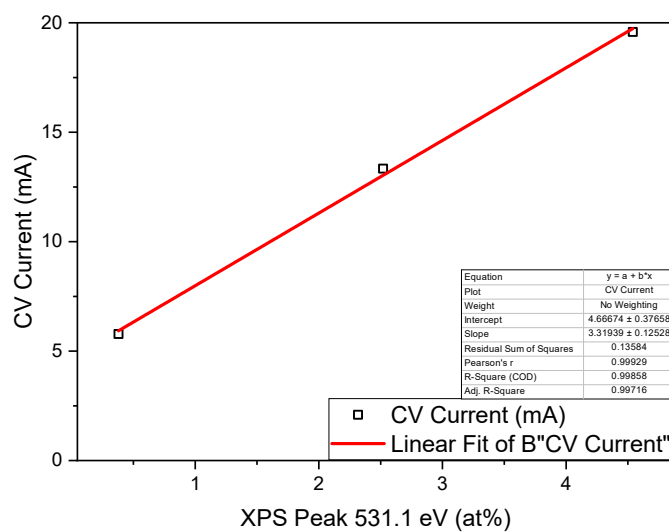

b)

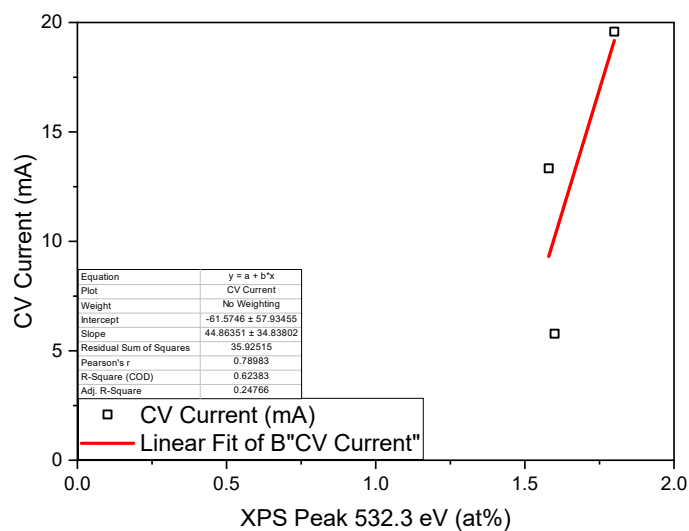

c)

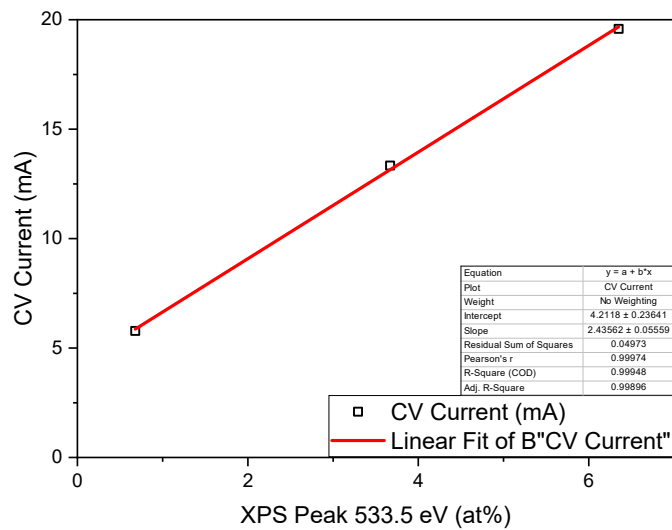

d)

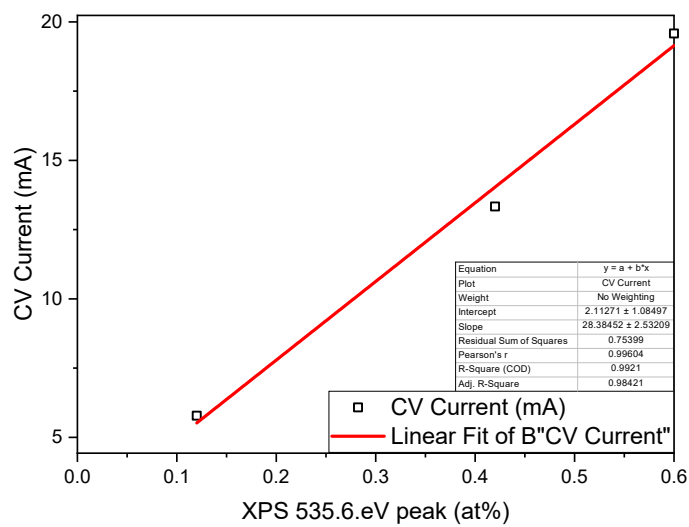

e)

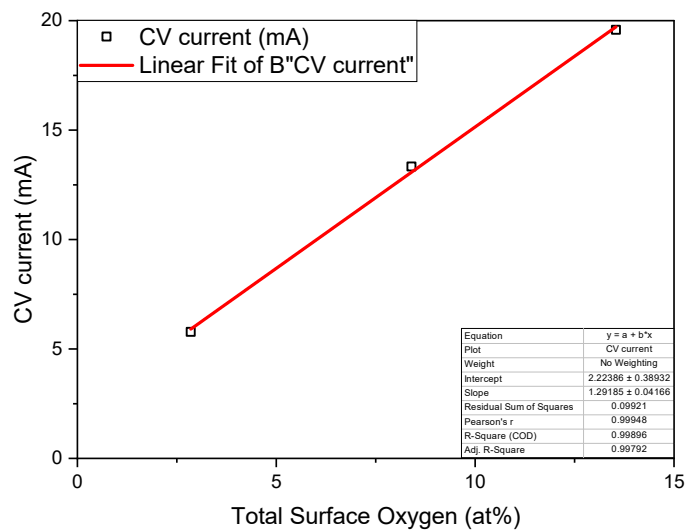

f)

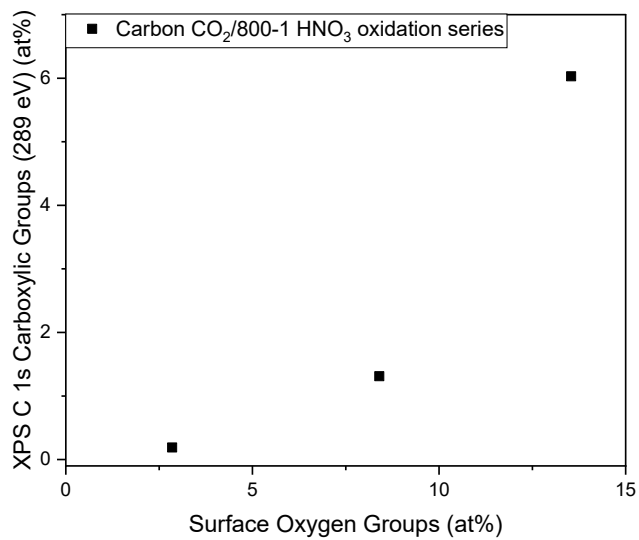



g)

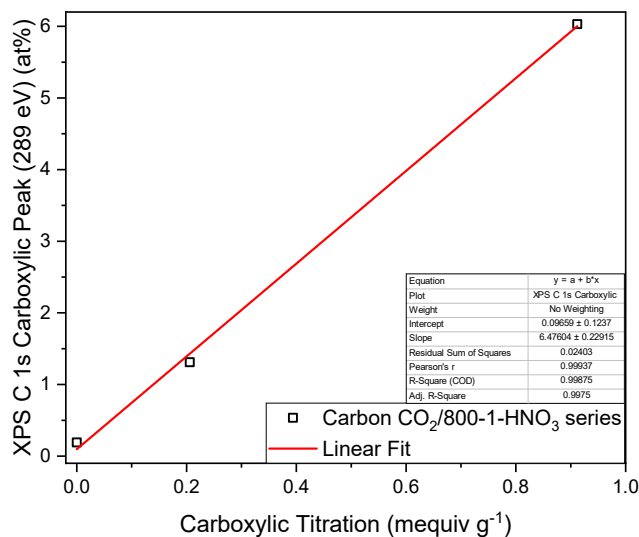

h)

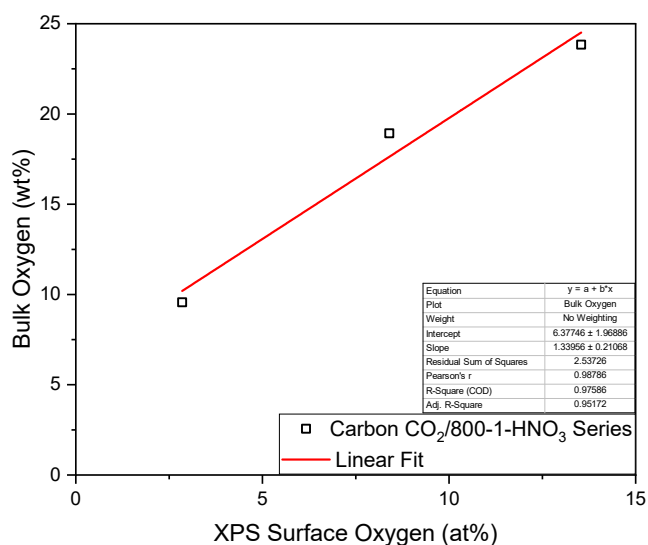

Figure S43. Comparison of characterization data for the HNO<sub>3</sub> functionalized carbons a) The variation of CV current with XPS 531.1 eV peak concentration, b) The variation of CV current with XPS 532.3 eV peak concentration, c) The variation of CV current with XPS 533.5 eV peak concentration, d) The variation of CV current with XPS 535.5 eV peak concentration, e) The variation of CV current with XPS surface oxygen concentration, f) The variation XPS C 1s carboxylic groups with XPS surface oxygen groups, g) The variation XPS C 1s carboxylic

groups with carboxylic groups obtained from titration measurements, h) The variation of bulk oxygen from chemical analysis with XPS surface oxygen group measurements.

## REFERENCES

1. M. Inagaki, in *Handbook of Advanced Ceramics*, ed. S. Somiya, Academic Press, Oxford, 2 edition., 2013, ch. 2, pp. 25-60.
